# Supplementary material for: Nucleophilicity of Glutathione: A Link to Michael Acceptor Reactivities
Source: PubMed Central journal article supplement (PMC6899611; doi:10.1002/anie.201909803), 2019-10-31
Supplement: ANIE-58-17704-s002.pdf [file ANIE-58-17704-s002.pdf]

## Supporting Information

### **Nucleophilicity of Glutathione: A Link to Michael Acceptor Reactivities**

*Robert J. Mayer and Armin R. Ofial\**

anie\_201909803\_sm\_miscellaneous\_information.pdf  
anie\_201909803\_sm\_geometries\_MAA.sdf

## – Supporting Information –

### CONTENT

|                                                                                                                         |            |
|-------------------------------------------------------------------------------------------------------------------------|------------|
| <b>General</b> .....                                                                                                    | <b>S2</b>  |
| <b>Product Analysis</b> .....                                                                                           | <b>S3</b>  |
| <b>GSH Microscopic Protonation Constants</b> .....                                                                      | <b>S9</b>  |
| <b>Relative Reactivity of GSH(NH<sub>3</sub><sup>+</sup>/S<sup>-</sup>) and GSH(NH<sub>2</sub>/S<sup>-</sup>)</b> ..... | <b>S11</b> |
| <b>Kinetics</b> .....                                                                                                   | <b>S15</b> |
| Kinetics of GSH with cationic and neutral reference electrophiles.....                                                  | S16        |
| Kinetics of AcCys with cationic and neutral reference electrophiles .....                                               | S21        |
| <b>Electrophilicity of Michael Acceptors towards GSH in Kinetic Assays</b> .....                                        | <b>S25</b> |
| <b>Quantum-Chemically Calculated Methyl Anion Affinities (<math>\Delta G_{MA}</math>) of Michael Acceptors</b> .....    | <b>S32</b> |
| <b>Applications</b> .....                                                                                               | <b>S42</b> |
| #1: Prediction of rate constants for the reactions of Michael acceptors with nucleophiles .....                         | S42        |
| #2: Estimating the electrophilicity of fluorescent thiol probes.....                                                    | S50        |
| #3: Quantitative structure/reactivity relationships for $\alpha,\beta$ -unsaturated carbonyl compounds ....             | S56        |
| #4: Rational prediction of Michael additions .....                                                                      | S57        |
| <b>References</b> .....                                                                                                 | <b>S59</b> |

## General

### Reagents

Glutathione (GSH) and acetyl cysteine (AcCys) were purchased from Sigma-Aldrich. Stock solutions of potassium hydroxide (KOH) were purchased from Bernd Kraft Laborchemikalien.

### Analytcs

Melting points were acquired using a Büchi Melting Point B-560 device and are not corrected.

Nuclear magnetic resonance spectra were recorded on 400 MHz NMR spectrometers. The following abbreviations and their combinations are used in the analysis of NMR spectra: s = singlet, d = doublet, t = triplet, q = quartet, m = multiplet, br s = broad singlet. NMR signals were assigned based on information from additional 2D NMR experiments (COSY, gHSQC, gHMBC, NOESY). Internal reference was set to the residual solvent signals ( $\delta_{\text{H}} = 4.79$  for  $\text{D}_2\text{O}$ ). The  $^{13}\text{C}$  NMR spectra were recorded under broad-band proton-decoupling.

Infrared (IR) spectra were recorded on a Perkin Elmer Spectrum BX-59343 instrument with a Smiths Detection DuraSamplIR II Diamond ATR sensor for detection in the range  $4500\text{--}600\text{ cm}^{-1}$ .

High resolution (HRMS) mass spectra were recorded on a Thermo Finnigan LTQ FT Ultra Fourier Transform ion cyclotron resonance mass spectrometer. For ionization of the samples, electrospray ionization (ESI) was applied.

### Kinetic measurements

Kinetics of reactions in alkaline, aqueous solution (degassed and prepared under an atmosphere of  $\text{N}_2$ ) were followed by employing stopped-flow UV/Vis photometry on Applied Photophysics SX20 systems. The temperature ( $20.0 \pm 0.2\text{ }^\circ\text{C}$ ) was controlled by using circulating bath cryostats. Acetonitrile was used as a co-solvent (0.5 or 11 vol-%) to solubilize the electrophiles.

## Product Analysis

### GS-E1·HBF<sub>4</sub> (RM551)

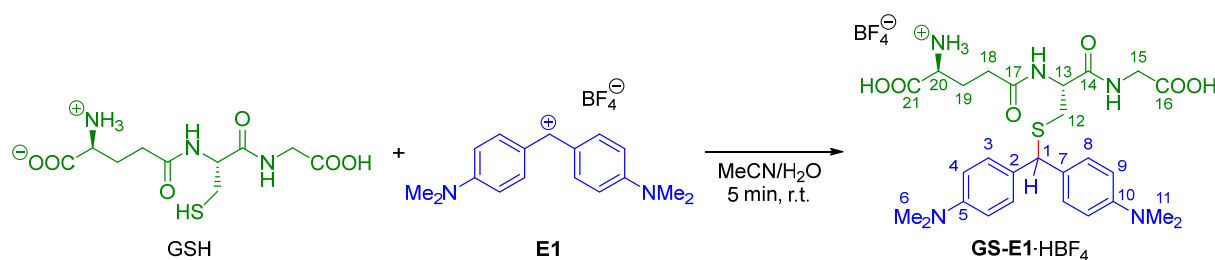

Glutathione (GSH, 35.2 mg, 0.115 mmol) was dissolved in water (5 mL). Under stirring, a solution of **E1**-BF<sub>4</sub> (39.0 mg, 0.115 mmol) in acetonitrile (2 mL) was added dropwise. The resulting pale greenish suspension was stirred for another 2 min. Then all solvents were removed in the vacuum. The residual highly viscous green oil slowly solidified to yield a pale green solid: **GS-E1**·HBF<sub>4</sub> (74.2 mg, yield: quant.).

<sup>1</sup>H NMR (400 MHz, D<sub>2</sub>O):  $\delta$  = 7.68–7.64 (m, 4 H, 3-H and 8-H), 7.55–7.51 (m, 4 H, 4-H and 9-H), 5.48 (s, 1 H, 1-H), 4.42 (dd,  $J$  = 8.7 Hz,  $J$  = 5.1 Hz, 1 H, 13-H), 3.84–3.81 (m, 2 H, 15-H), 3.79 (t,  $J$  = 6.4 Hz, 1 H, 20-H), 3.234 (s, 6 H, 6-H or 11-H), 3.230 (s, 6 H, 6-H or 11-H), 3.04 (dd,  $^2J$  = 14.3 Hz,  $^3J$  = 5.1, 1 H, 12-H<sup>a</sup>), 2.86 (dd,  $^2J$  = 14.2 Hz,  $^3J$  = 8.8 Hz, 1 H, 12-H<sup>b</sup>), 2.55–2.51 (m, 2 H, 18-H), 2.20–2.14 (m, 2 H, 19-H).

<sup>13</sup>C{<sup>1</sup>H} NMR (101 MHz, D<sub>2</sub>O):  $\delta$  = 174.9 (C<sub>q</sub>, C-16), 174.5 (C<sub>q</sub>, C-17), 173.7 (C<sub>q</sub>, C-21), 171.7 (C<sub>q</sub>, C-14), 142.2 (C<sub>q</sub>, C-5 and C-10), 141.6 (C-2), 141.3 (C-7), 130.0 (CH, C-3 and C-8), 120.3 (CH, C-4 and C-9), 53.9 (CH, C-20), 52.7 (CH, C-13), 52.0 (CH, C-1), 45.70 (CH<sub>3</sub>, C-6 or C-11), 45.66 (CH<sub>3</sub>, C-6 or C-11), 42.5 (CH<sub>2</sub>, C-15), 33.5 (CH<sub>2</sub>, C-12), 31.4 (CH<sub>2</sub>, C-18), 26.2 (CH<sub>2</sub>, C-19).

HRMS (ESI<sup>+</sup>): Calcd  $m/z$  for [C<sub>27</sub>H<sub>38</sub>N<sub>5</sub>O<sub>6</sub>S]<sup>+</sup> [M + H<sup>+</sup>]: 560.2537; Found: 560.2548.

IR (ATR, neat): 2934, 2509, 1726, 1609, 1518, 1448, 1410, 1351, 1228, 1054, 806, 764 cm<sup>-1</sup>.

mp 140–145 °C (the sample turned bright blue at 80 °C and then dark blue at 120 °C; the exact melting point could therefore not be determined).

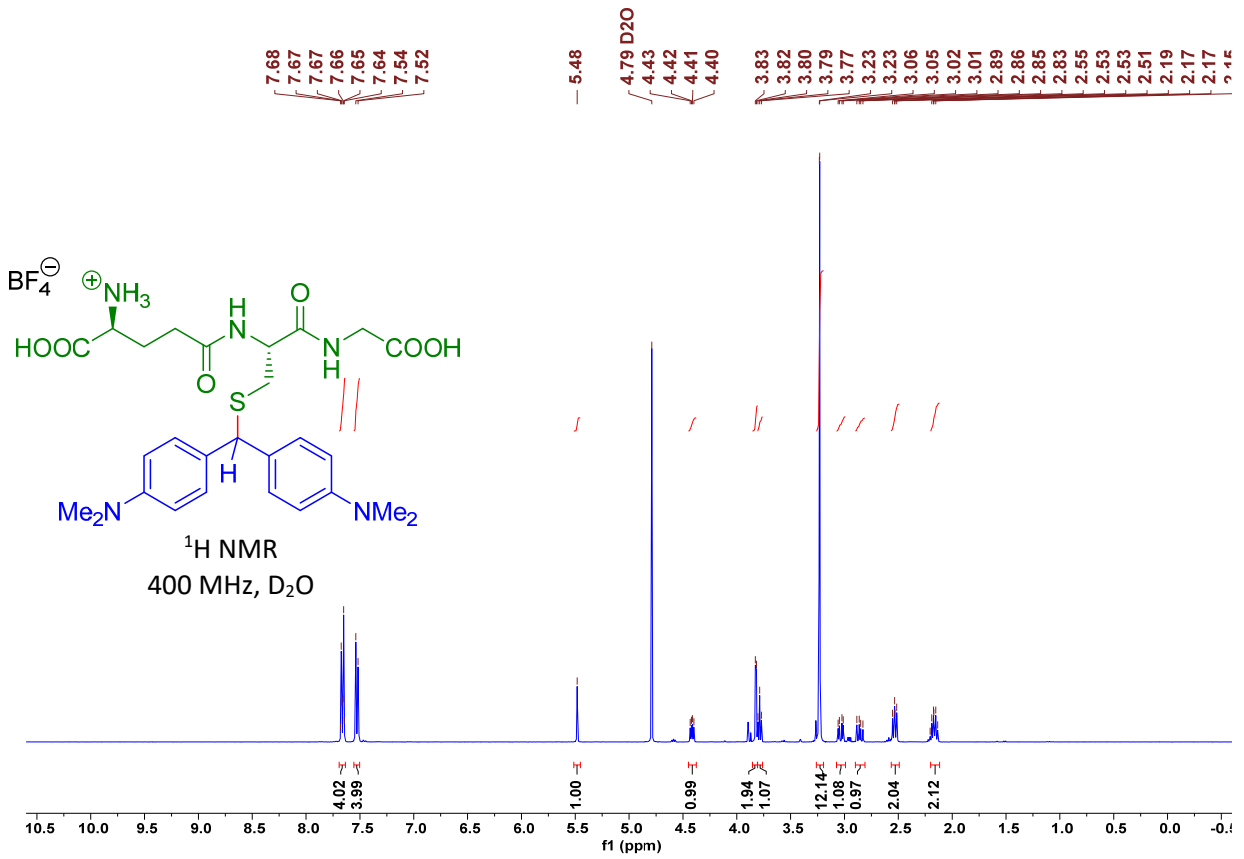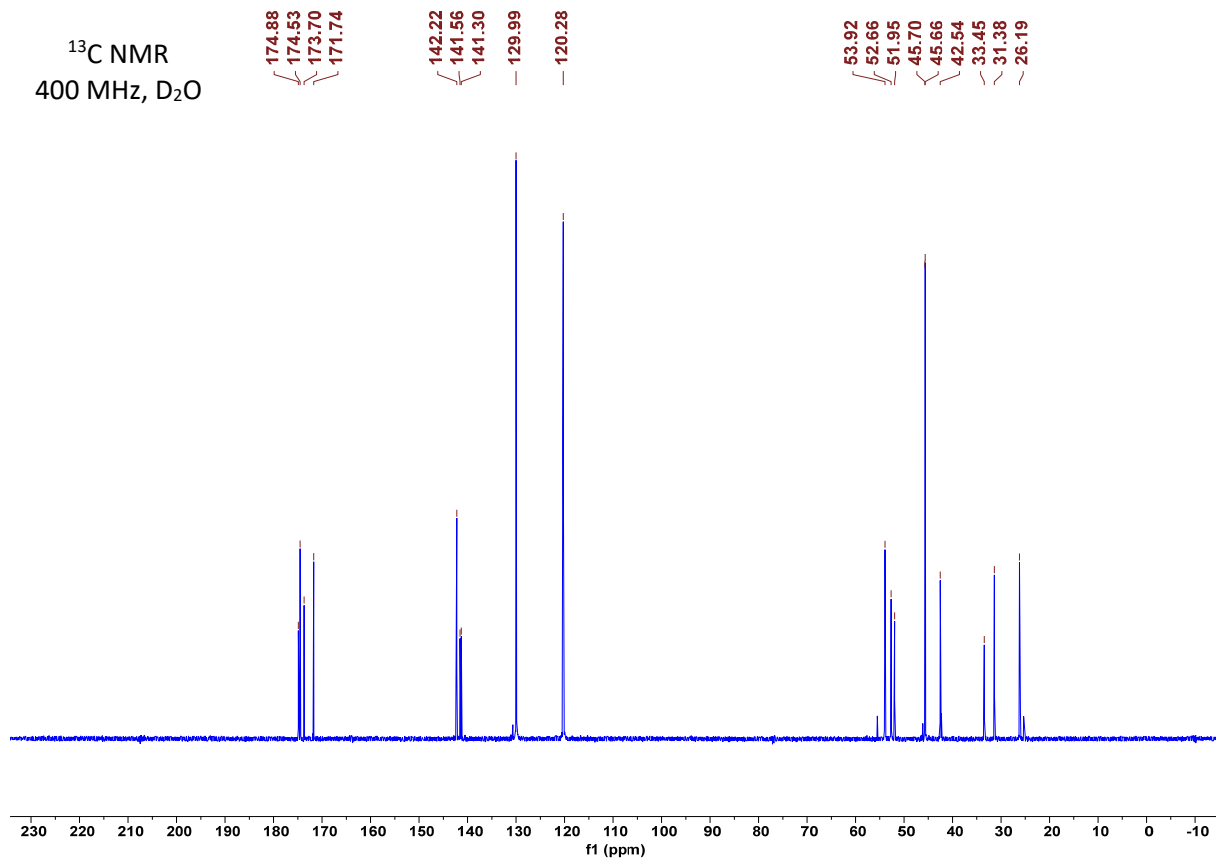

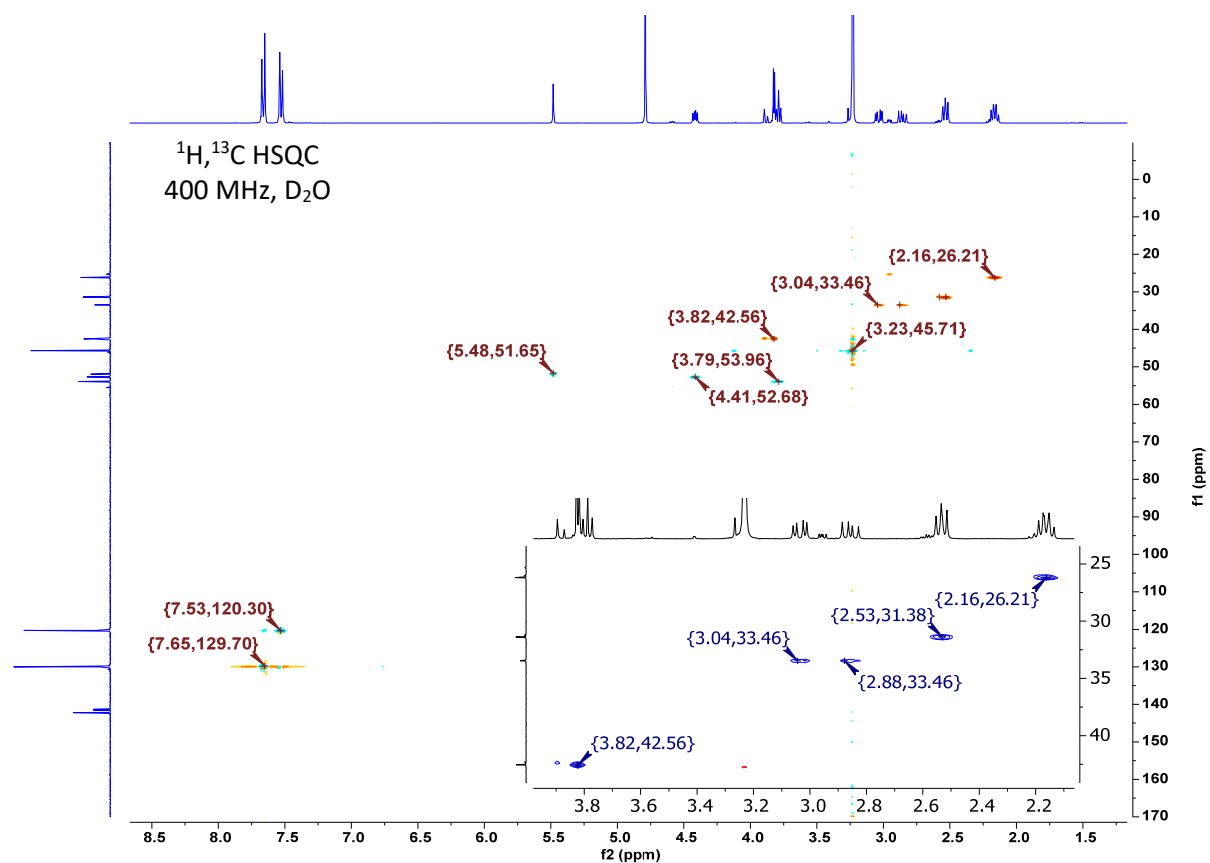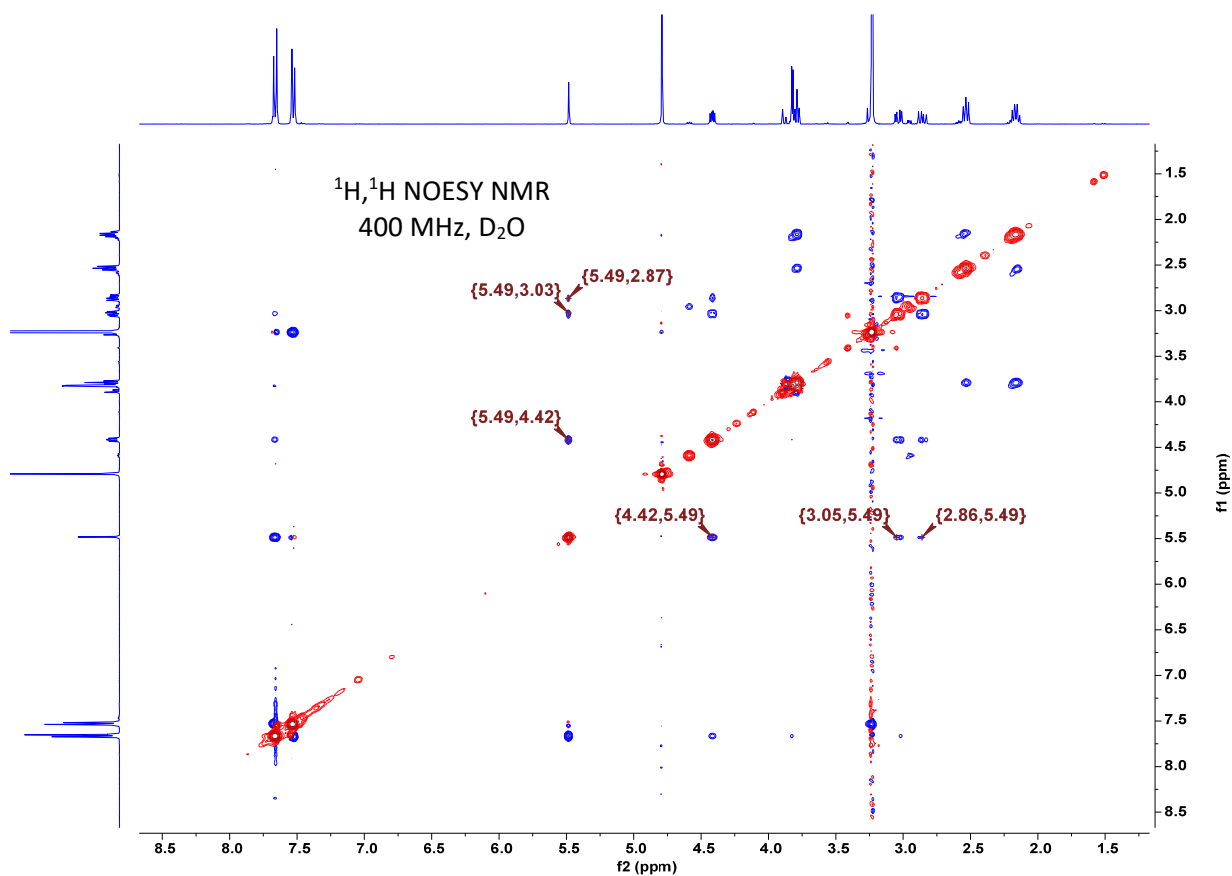

The marked resonances in the NOESY spectrum indicate the vicinity of 1-H with 12-H and 13-H.

### AcCys-E1·HBF<sub>4</sub> (RNH45)

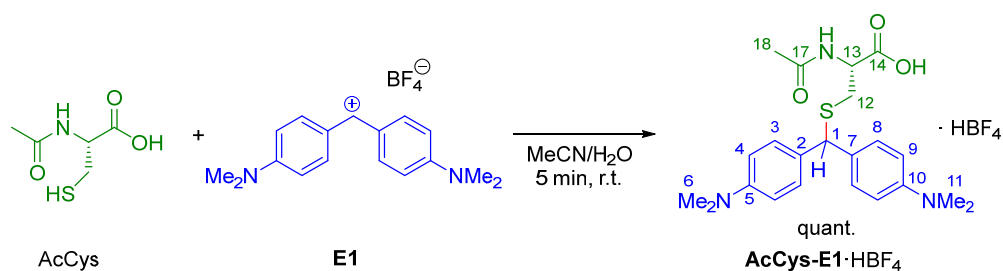

To a stirred solution of *N*-acetylcysteine (18.7 mg, 0.115 mmol) in water (5 mL) was added dropwise a solution of **E1**-BF<sub>4</sub> (39.0 mg, 0.115 mmol) in acetonitrile (2 mL). The resulting pale blue solution was stirred for another 2 min. Then all solvents were removed in the vacuum. The residual highly viscous green oil slowly solidified to yield a pale blue solid: **AcCys-E1**·HBF<sub>4</sub> (57.5 mg, 0.0114 mmol, yield: 99%).

<sup>1</sup>H NMR (400 MHz, D<sub>2</sub>O)  $\delta$  = 7.71–7.66 (m, 4 H, 3-H and 8-H), 7.58–7.54 (m, 4 H, 4-H and 9-H), 5.52 (s, 1 H, 1-H), 4.30 (dd, <sup>3</sup>*J* = 8.1 Hz, <sup>3</sup>*J* = 4.5 Hz, 1 H, 13-H), 3.26 (s, 12 H, 6-H and 11-H), 2.99 (dd, <sup>2</sup>*J* = 14.0 Hz, <sup>3</sup>*J* = 4.5 Hz, 1 H, 12-H<sup>a</sup>), 2.86 (dd, <sup>2</sup>*J* = 14.0 Hz, <sup>3</sup>*J* = 8.1 Hz, 1 H, 12-H<sup>b</sup>), 2.03 (s, 3 H, 18-H).

<sup>13</sup>C{<sup>1</sup>H} NMR (101 MHz, D<sub>2</sub>O)  $\delta$  = 175.8 (C<sub>q</sub>, C-14), 173.4 (C<sub>q</sub>, C-17), 142.1 (C<sub>q</sub>), 141.9 (C<sub>q</sub>), 141.83 (C<sub>q</sub>), 141.81 (C<sub>q</sub>), 130.09 (CH, C-3 or C-8), 130.07 (CH, C-3 or C-8), 120.44 (CH, C-4 or C-9), 120.39 (CH, C-4 or C-9), 53.7 (CH, C-13), 51.8 (CH, C-1), 45.88 (CH<sub>3</sub>, C-6 or C-11), 45.86 (CH<sub>3</sub>, C-6 or C-11), 34.0 (CH<sub>2</sub>, C-12), 21.8 (CH<sub>3</sub>, C-18).

HRMS (ESI<sup>-</sup>): Calcd *m/z* for [C<sub>22</sub>H<sub>28</sub>N<sub>3</sub>O<sub>3</sub>S]<sup>-</sup>: 414.1857; Found: 414.1864.

IR (ATR, neat): 2470, 1727, 1608, 1517, 1374, 1185, 1052, 900, 805, 763 cm<sup>-1</sup>.

mp 55–65 °C (the sample turned green-black when heated to > 50 °C).

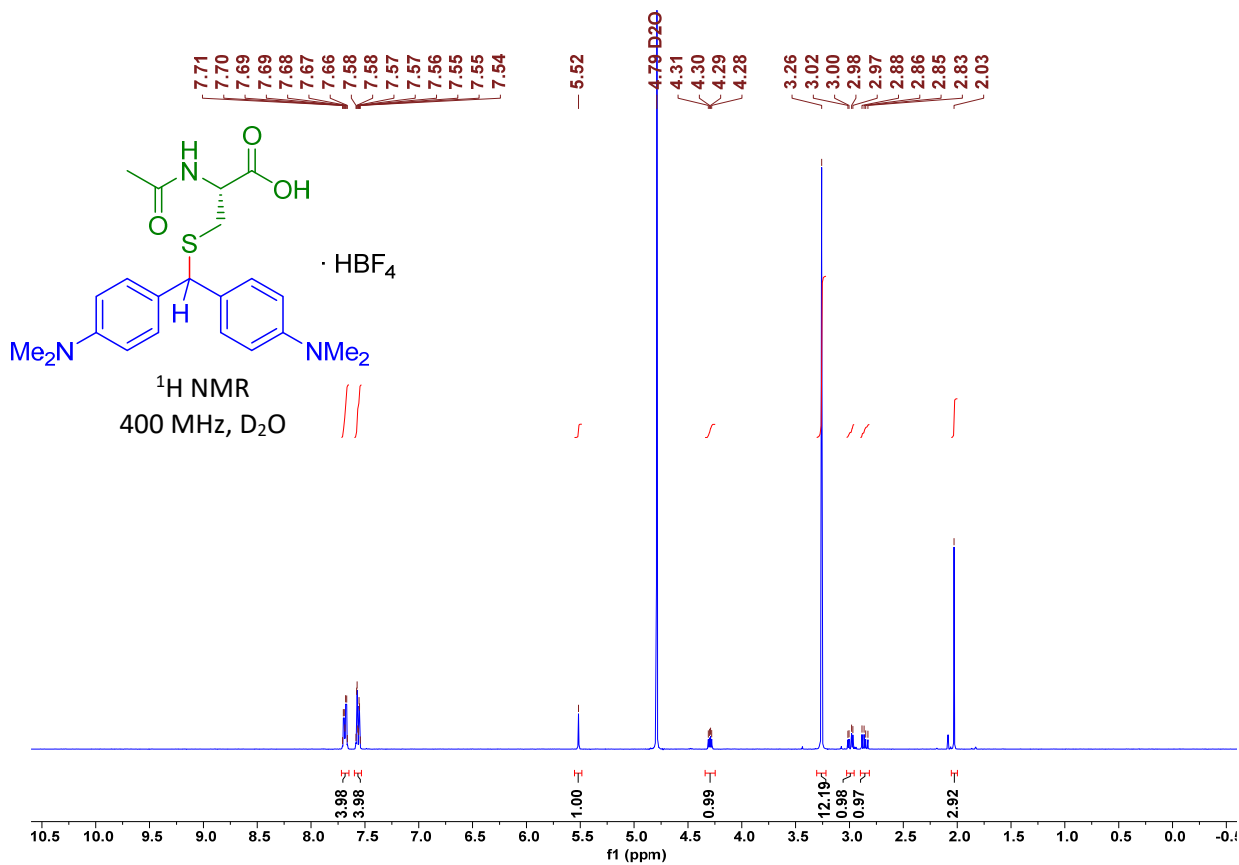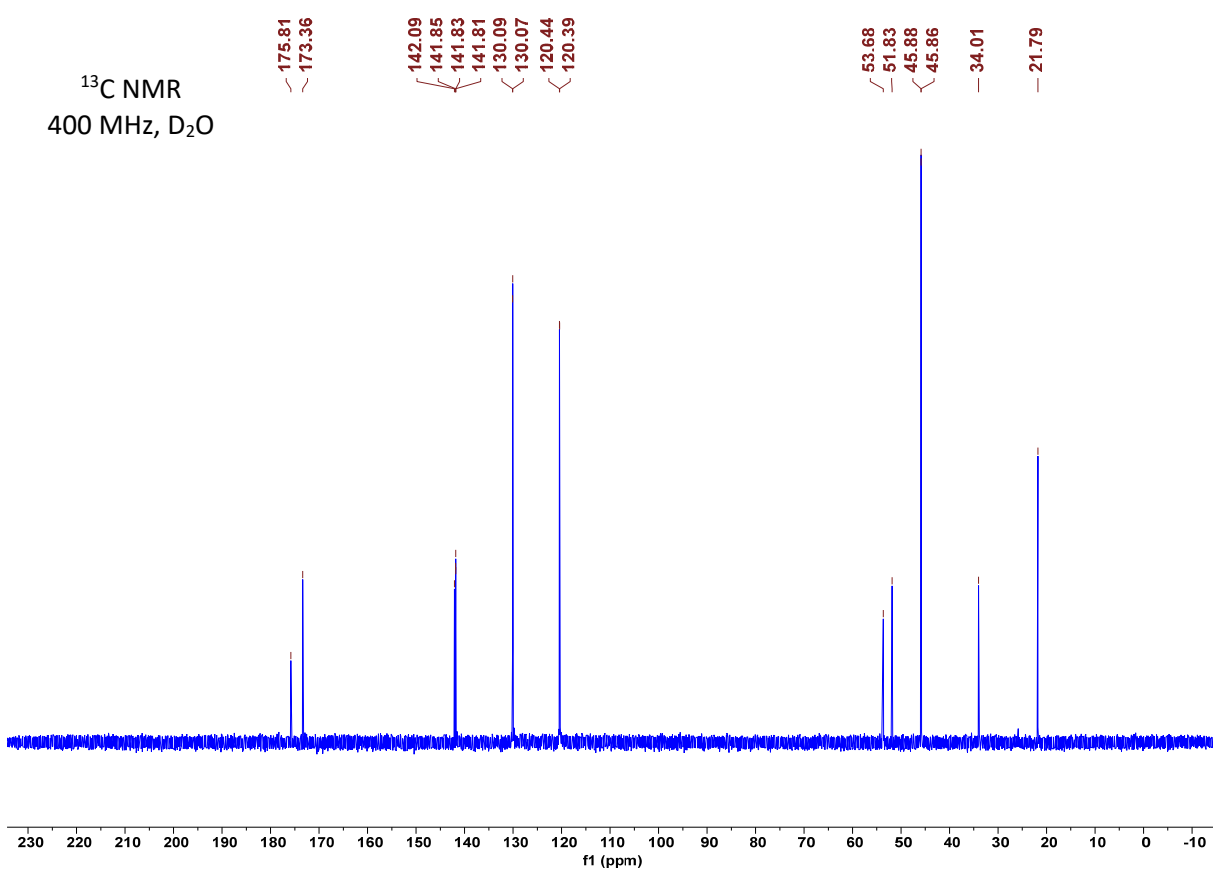



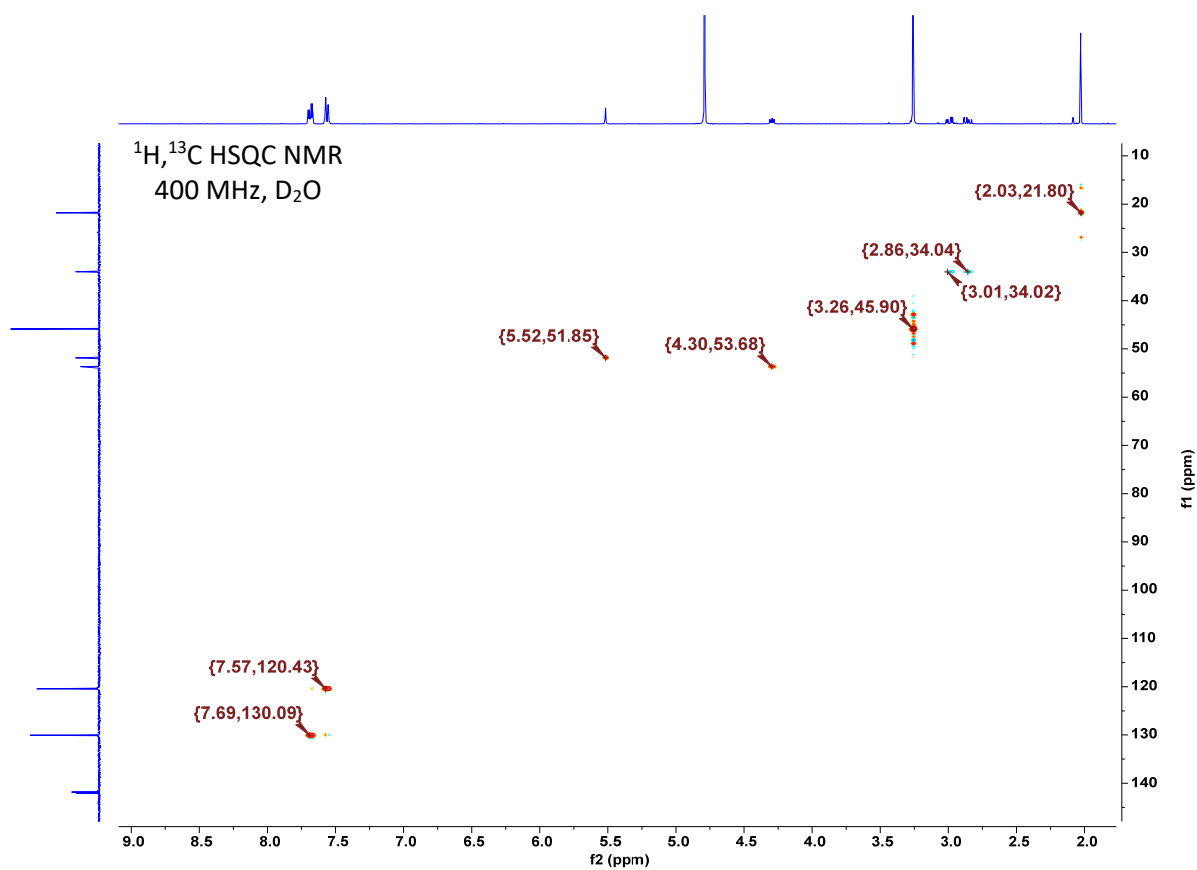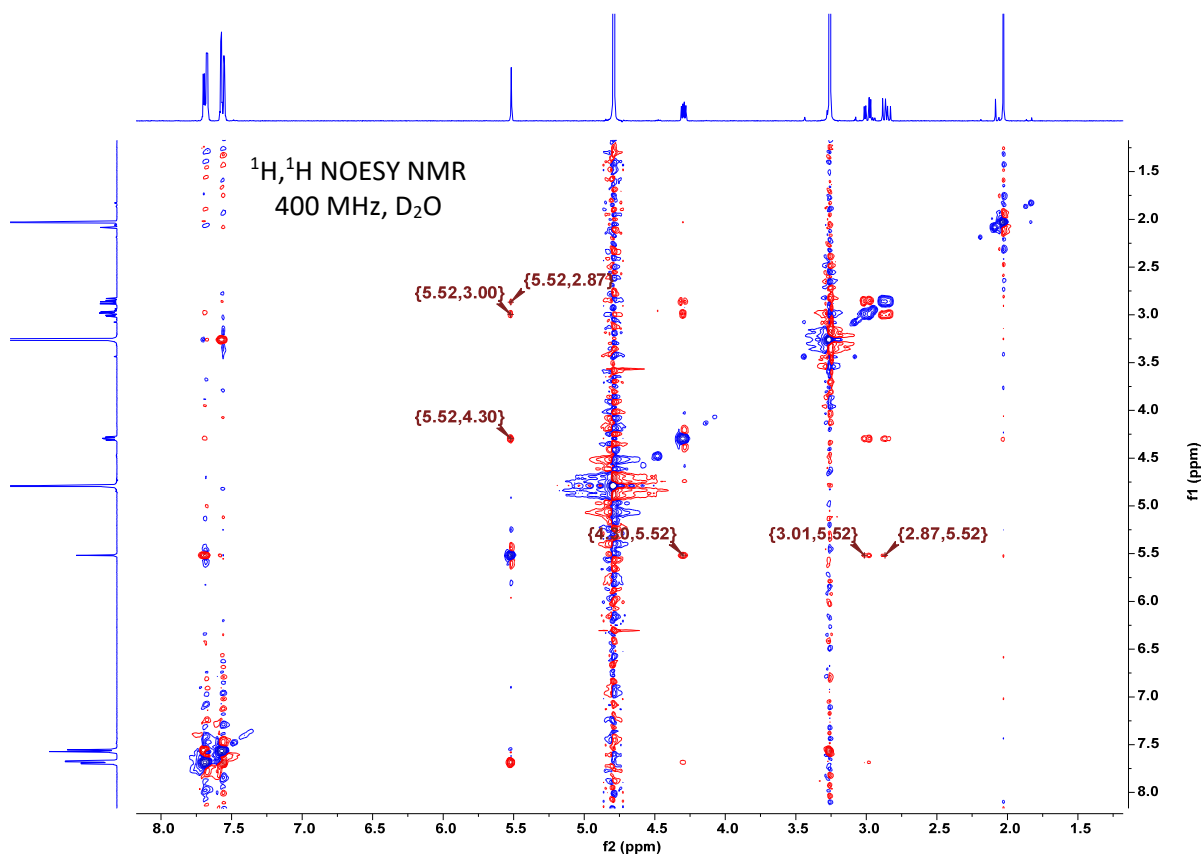

The marked resonances in the NOESY spectrum indicate the vicinity of 1-H to 12-H and 13-H.

## GSH Microscopic Protonation Constants

If multiple acidic sites in a molecule dissociate simultaneously at a certain pH value, macroscopic protonation constants are hybrid and do not accurately describe the degree of ionization at the molecular level. Instead, microscopic ionizations constants are required for polyvalent acids to calculate the precise distribution of protonated and deprotonated species at a certain pH.<sup>[S1]</sup>

Details of the acid-base chemistry of glutathione (GSH) have previously been analyzed by Friedman and co-workers,<sup>[S2]</sup> Rabenstein,<sup>[S3]</sup> and more recently by Noszál and co-workers.<sup>[S4]</sup>

We used the GSH ionization scheme by Rabenstein, which involves the seven species **A** to **H** that are interconnected by eight microscopic dissociation constants (Scheme S1).<sup>[S3]</sup> In the pH range from 7 to 12, the species **D** to **H** and the dissociation constants  $K_{DF}$ ,  $K_{DG}$ ,  $K_{FH}$ , and  $K_{GH}$  are relevant.

**Scheme S1:** Protonation scheme for GSH and the related microscopic protonation constants according to Rabenstein.<sup>[S3]</sup>

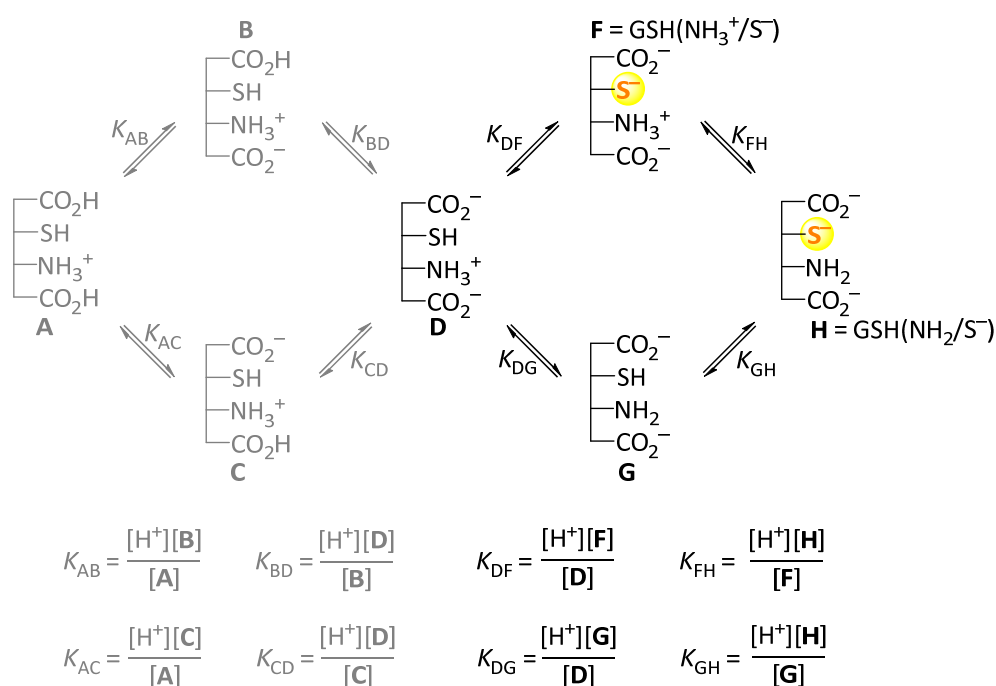

At a certain pH, the fraction  $F_i$  of each species  $i$  present in the equilibrium can be calculated from the microscopic dissociation constants as exemplified for species **F** [= GSH(NH<sub>3</sub><sup>+</sup>/S<sup>-</sup>)] in equation S1 and for species **H** [= GSH(NH<sub>2</sub>/S<sup>-</sup>)] in equation S2.

$$\text{for GSH}(\text{NH}_3^+/\text{S}^-): F_{\text{F}} = \frac{[\text{F}]}{[\text{D}] + [\text{F}] + [\text{G}] + [\text{H}]} = \frac{K_{\text{DF}}/K_{\text{DG}}}{[\text{H}^+]/K_{\text{DG}} + K_{\text{DF}}/K_{\text{DG}} + 1 + K_{\text{GH}}/[\text{H}^+]} \quad (\text{S1})$$

$$\text{for GSH}(\text{NH}_2/\text{S}^-): F_{\text{H}} = \frac{[\text{H}]}{[\text{D}] + [\text{F}] + [\text{G}] + [\text{H}]} = \frac{K_{\text{GH}}/[\text{H}^+]}{[\text{H}^+]/K_{\text{DG}} + K_{\text{DF}}/K_{\text{DG}} + 1 + K_{\text{GH}}/[\text{H}^+]} \quad (\text{S2})$$

Analogously, the total fraction of reactive nucleophilic species, for example, for GSH species with a free thiolate group ( $F_{\text{S}^-}$ ) or GSH species with a free amino group ( $F_{\text{NH}_2}$ ) can be calculated by equations S3 and S4, respectively.

$$F_{\text{S}^-} = F_{\text{F}} + F_{\text{H}} = \frac{[\text{F}] + [\text{H}]}{[\text{D}] + [\text{F}] + [\text{G}] + [\text{H}]} = \frac{K_{\text{DF}}/K_{\text{DG}} + K_{\text{GH}}/[\text{H}^+]}{[\text{H}^+]/K_{\text{DG}} + K_{\text{DF}}/K_{\text{DG}} + 1 + K_{\text{GH}}/[\text{H}^+]} \quad (\text{S3})$$

$$F_{\text{NH}_2} = F_{\text{G}} + F_{\text{H}} = \frac{[\text{G}] + [\text{H}]}{[\text{D}] + [\text{F}] + [\text{G}] + [\text{H}]} = \frac{1 + K_{\text{GH}}/[\text{H}^+]}{[\text{H}^+]/K_{\text{DG}} + K_{\text{DF}}/K_{\text{DG}} + 1 + K_{\text{GH}}/[\text{H}^+]} \quad (\text{S4})$$

Microscopic protonation constants for GSH have been determined by  $^1\text{H}$  NMR spectroscopic titration experiments.<sup>[S3,S4]</sup> In this work, we used the microscopic protonation constants by Noszál and co-workers (Table S1) who followed the changes of  $^1\text{H}$  NMR chemical shifts in the GSH protonation equilibria by using a 600 MHz NMR spectrometer.<sup>[S4]</sup>

**Table S1:** Microscopic protonation constants for the equilibria between GSH species **D**, **F**, **G**, and **H** (in  $\text{H}_2\text{O}/\text{D}_2\text{O}$  95:5 (v/v), at 25 °C and 0.15 mol  $\text{L}^{-1}$  ionic strength, from ref [S4])

|                         |                 |
|-------------------------|-----------------|
| $\text{p}K_{\text{DF}}$ | $8.94 \pm 0.02$ |
| $\text{p}K_{\text{DG}}$ | $9.17 \pm 0.02$ |
| $\text{p}K_{\text{FH}}$ | $9.49 \pm 0.01$ |
| $\text{p}K_{\text{GH}}$ | $9.26 \pm 0.01$ |

By applying the microscopic protonation constants from Table S1 in equations S1–S3, one can calculate the pH-dependent distribution of reactive GSH species in aqueous solution. As depicted in Figure S1, at  $\text{pH} < 8$  nucleophilic GSH reactivity is mostly caused by species **F** [=  $\text{GSH}(\text{NH}_3^+/\text{S}^-)$ ]. Thiolate **F** is also the only relevant species for nucleophilic reactions of GSH under physiological conditions ( $\text{pH}$  7.4). At  $\text{pH} > 11$ , the GSH species **H** [=  $\text{GSH}(\text{NH}_2/\text{S}^-)$ ] predominates.

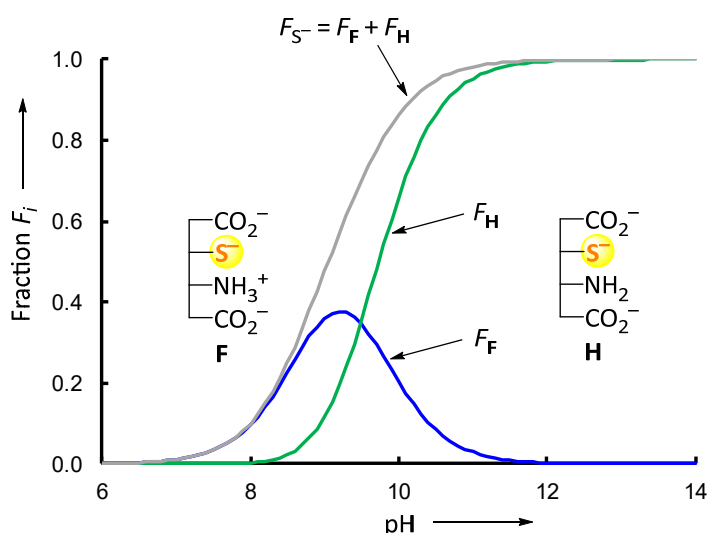

**Figure S1:** Distribution of GSH species **F** and **H** with a reactive thiolate group as a function of pH.

## Relative Reactivity of GSH(NH<sub>3</sub><sup>+</sup>/S<sup>-</sup>) and GSH(NH<sub>2</sub>/S<sup>-</sup>)

Friedman showed that protonation at the remote  $\gamma$ -glutamyl NH<sub>2</sub> group (that is, **F**  $\rightarrow$  **H**) reduced the GSH thiolate reactivity toward acrylonitrile by a factor of 2.<sup>[S2]</sup>

To assess whether this reactivity difference between both reactive GSH thiolate species **F** [that is, GSH(NH<sub>3</sub><sup>+</sup>/S<sup>-</sup>)] and **H** [that is, GSH(NH<sub>2</sub>/S<sup>-</sup>)] also holds for our series of experiments, we studied the pH-dependent reactivity of GSH with the benzhydrylium ion **E4**.

Stock solutions of GSH, Na<sub>3</sub>PO<sub>4</sub>, Na<sub>2</sub>H<sub>2</sub>PO<sub>4</sub> and NaH<sub>2</sub>PO<sub>4</sub> were mixed in variable ratios to achieve a certain pH in the reaction chamber of the stopped-flow instrument. The reactions between the electrophile **E4** and the nucleophilic GSH species were then monitored by following the mono-exponential decay of the UV-Vis absorbance of the colored **E4** by using the stopped-flow technique. Experimental conditions and observed first-order rate constants  $k_{\text{obs}}$  are gathered in Table S2.

Concentrations of the reactive GSH species **F** and **H** at different pH were calculated from the relationships  $[\mathbf{F}] = F_{\mathbf{F}}[\text{GSH}]_0$  and  $[\mathbf{H}] = F_{\mathbf{H}}[\text{GSH}]_0$ . Partial second-order rate constants  $k_{\mathbf{F}}^{\text{calcd}}$  and  $k_{\mathbf{H}}^{\text{calcd}}$  for the nucleophilic GSH species **F** and **H** were then determined by equations S5 and S6, respectively.

$$k_{\mathbf{F}}^{\text{calcd}} = 0.5k_2[\text{GSH}]_0F_{\mathbf{F}} \quad (\text{S5})$$

$$k_{\mathbf{H}}^{\text{calcd}} = k_2[\text{GSH}]_0F_{\mathbf{H}} \quad (\text{S6})$$

The second-order rate constant  $k_2$  (20 °C) for the reaction of **E4** with **H** [that is, GSH(NH<sub>2</sub>/S<sup>-</sup>)] at pH 12 was determined experimentally in this work ( $k_2 = 6.60 \times 10^5 \text{ M}^{-1} \text{ s}^{-1}$ , see below). The factor 0.5 in

equation S5 considers the relative reactivity of **F** and **H** towards electrophiles reported by Friedman.<sup>[S2]</sup> In this way, the overall rate constant  $k_{S^-}^{\text{calcd}}$  for the reaction of GSH with **E4** at a certain pH was obtained as the sum of both partial rate constants (equation S7).

$$k_{S^-}^{\text{calcd}} = k_F^{\text{calcd}} + k_H^{\text{calcd}} \quad (\text{S7})$$

**Table S2.** Dependency of the first-order rate constants for reactions of GSH ( $[\text{GSH}]_0 = 1.00 \times 10^{-4}$  M) and **E4** ( $[\text{E4}]_0 = 5.45 \times 10^{-6}$  M) on the pH of the aqueous solution (20 °C).

| pH <sup>[a]</sup> | $k_{\text{obs}}$ (s <sup>-1</sup> ) | lg $k_{\text{obs}}$ | $F_F$                 | $k_F^{\text{calcd}}$ (s <sup>-1</sup> ) | $F_H$                 | $k_H^{\text{calcd}}$ (s <sup>-1</sup> ) | lg $k_{S^-}^{\text{calcd}}$ |
|-------------------|-------------------------------------|---------------------|-----------------------|-----------------------------------------|-----------------------|-----------------------------------------|-----------------------------|
| 11.93             | $5.66 \times 10^1$                  | <b>1.75</b>         | $3.61 \times 10^{-3}$ | $1.19 \times 10^{-1}$                   | $9.94 \times 10^{-1}$ | $65.6 \times 10^1$                      | <b>1.82</b>                 |
| 11.67             | $4.80 \times 10^1$                  | <b>1.68</b>         | $6.54 \times 10^{-3}$ | $2.16 \times 10^{-1}$                   | $9.90 \times 10^{-1}$ | $65.3 \times 10^1$                      | <b>1.82</b>                 |
| 11.41             | $5.43 \times 10^1$                  | <b>1.73</b>         | $1.18 \times 10^{-2}$ | $3.89 \times 10^{-1}$                   | $9.81 \times 10^{-1}$ | $6.48 \times 10^1$                      | <b>1.81</b>                 |
| 10.85             | $5.39 \times 10^1$                  | <b>1.74</b>         | $4.08 \times 10^{-2}$ | 1.35                                    | $9.35 \times 10^{-1}$ | $6.17 \times 10^1$                      | <b>1.80</b>                 |
| 10.40             | $5.37 \times 10^1$                  | <b>1.73</b>         | $1.03 \times 10^{-1}$ | 3.38                                    | $8.34 \times 10^{-1}$ | $5.50 \times 10^1$                      | <b>1.77</b>                 |
| 9.81              | $4.37 \times 10^1$                  | <b>1.64</b>         | $2.62 \times 10^{-1}$ | 8.65                                    | $5.48 \times 10^{-1}$ | $3.62 \times 10^1$                      | <b>1.65</b>                 |
| 9.56              | $3.93 \times 10^1$                  | <b>1.59</b>         | $3.33 \times 10^{-1}$ | $1.10 \times 10^1$                      | $3.91 \times 10^{-1}$ | $2.58 \times 10^1$                      | <b>1.57</b>                 |
| 9.23              | $2.67 \times 10^1$                  | <b>1.43</b>         | $3.77 \times 10^{-1}$ | $1.24 \times 10^1$                      | $2.07 \times 10^{-1}$ | $1.37 \times 10^1$                      | <b>1.42</b>                 |
| 8.64              | $1.79 \times 10^1$                  | <b>1.25</b>         | $2.68 \times 10^{-1}$ | 8.86                                    | $3.79 \times 10^{-2}$ | 2.50                                    | <b>1.06</b>                 |
| 8.56              | 8.92                                | <b>0.95</b>         | $2.44 \times 10^{-1}$ | 8.04                                    | $2.86 \times 10^{-2}$ | 1.89                                    | <b>1.00</b>                 |
| 8.45              | $1.25 \times 10^1$                  | <b>1.10</b>         | $2.10 \times 10^{-1}$ | 6.92                                    | $1.91 \times 10^{-2}$ | 1.26                                    | <b>0.91</b>                 |
| 8.01              | 2.45                                | <b>0.39</b>         | $9.87 \times 10^{-2}$ | 3.26                                    | $3.27 \times 10^{-3}$ | $2.16 \times 10^{-1}$                   | <b>0.54</b>                 |
| 7.17              | 1.03                                | <b>0.01</b>         | $1.65 \times 10^{-2}$ | $5.46 \times 10^{-1}$                   | $7.91 \times 10^{-5}$ | $5.22 \times 10^{-3}$                   | <b>-0.26</b>                |
| 6.89              | $2.92 \times 10^{-1}$               | <b>-0.53</b>        | $8.79 \times 10^{-3}$ | $2.90 \times 10^{-1}$                   | $2.21 \times 10^{-5}$ | $1.46 \times 10^{-3}$                   | <b>-0.54</b>                |
| 6.12              | $6.87 \times 10^{-2}$               | <b>-1.16</b>        | $1.51 \times 10^{-3}$ | $4.98 \times 10^{-2}$                   | $6.44 \times 10^{-7}$ | $4.25 \times 10^{-5}$                   | <b>-1.30</b>                |
| 4.90              | $4.92 \times 10^{-3}$               | <b>-2.31</b>        | $9.12 \times 10^{-5}$ | $3.01 \times 10^{-3}$                   | $2.34 \times 10^{-9}$ | $1.55 \times 10^{-7}$                   | <b>-2.52</b>                |

[a] An aliquot of each GSH/phosphate buffer solution was mixed with water in a 1:1 ratio (as in the reaction chamber of the stopped-flow spectrometer) and the pH value was determined.

Figure S2 compares the observed pH-dependent reactivity of GSH towards electrophile **E4** (lg  $k_{\text{obs}}$ ) with the predicted behavior for the thiolate species of GSH (lg  $k_{S^-}^{\text{calcd}}$ ). The fact that the experimental data points (black dots, from column 3 in Table S2) are located in close vicinity to the predicted rate constants lg  $k_{S^-}^{\text{calcd}}$  (dashed grey line, from last column in Table S2) demonstrates that GSH reactivity in aqueous solutions is clearly dominated by the reactivity of the two thiolate species **F** and **H** in the pH range from 4 to 13.

Analogous calculations showed that the free amino groups in the GSH species **G** and **H** (dashed red line for  $\lg k_{\text{NH}_2}^{\text{calcd}}$  in Figure S2) can be expected to contribute only to a negligible extent (<0.1%) to the kinetics of the GSH reactions with the electrophile **E4**. Also background reactions of **E4** with hydroxide ions or water ( $\lg k_{\text{OH}}^{\text{calcd}}$ ) do not play a significant role at  $\text{pH} > 4$ .

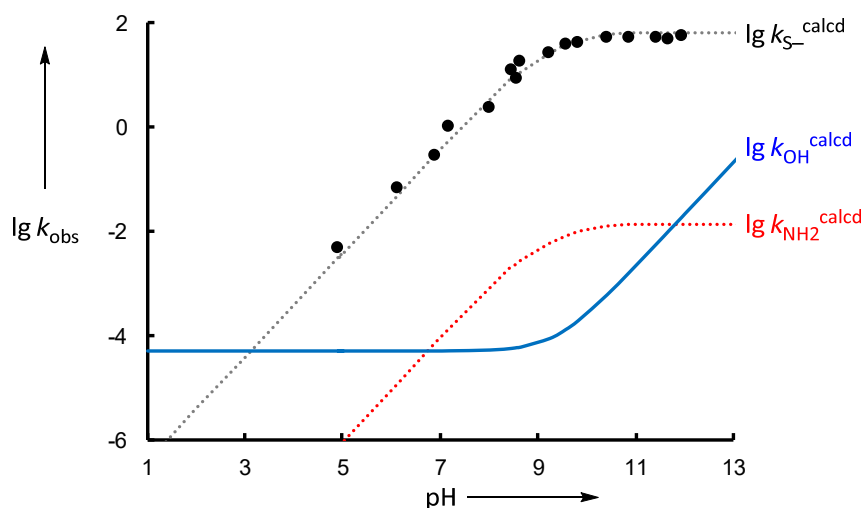

**Figure S2:** Observed first-order rate constants  $\lg k_{\text{obs}}$  (20 °C) for the reaction of GSH with **E4** (dashed grey line:  $\lg k_{\text{S}^-}^{\text{calcd}}$  from Table S2; dashed red line:  $\lg k_{\text{NH}_2}^{\text{calcd}}$  calculated from  $k_{\text{NH}_2} = k_2 F_{\text{NH}_2}$  by using  $k_2 = 140 \text{ M}^{-1} \text{ s}^{-1}$  for the reaction of glutamate with **E4**, from ref [S5b] and  $F_{\text{NH}_2}$  as defined in equation S4; blue line: background reaction of **E4** with hydroxide ions and/or water).

Furthermore, the excellent agreement between  $\lg k_{\text{obs}}$  and  $\lg k_{\text{S}^-}^{\text{calcd}}$  in Figure S2 corroborates that the relative reactivity of the GSH thiolate species **F** and **H** towards electrophiles is generally described by  $k_{\text{F}} = 0.5k_{\text{H}}$ , as initially found by Friedman and co-workers for the reaction of GSH with acrylonitrile.<sup>[S2]</sup> As a consequence, we have used the relation  $k_{\text{F}} = 0.5k_{\text{H}}$  for converting our rate constants of GSH/electrophile reactions at  $\text{pH} 12$  (where the reactive GSH species **H** prevails) to the more commonly used rate constants of GSH/electrophile reactions at physiological  $\text{pH} 7.4$  (where the reactive GSH species **F** predominates).

In Table 2 (main text), we applied equation S8 to convert reported second-order rate constants  $k_{\text{GSH}}$  into second-order rate constants  $k_2(\text{GS}^-)$  for the relevant thiolate reactivity of GSH.

$$k_2(\text{GS}^-) = k_{\text{GSH}} / (F_{\text{F}} + 2F_{\text{H}}) = k_{\text{GSH}} / F \quad (\text{S8})$$

The Friedman factor ( $k_{\text{H}} = 2k_{\text{F}}$ ) was applied to reflect the different reactivity of the thiolate species **F** and **H** in the overall fraction  $F$  of nucleophilic thiolate ions, that is,  $F = F_{\text{F}} + 2F_{\text{H}}$ . The fractions of GSH

thiolates present at pH 7.2, 7.4, 8.0, and 8.1, previously used to determine  $k_{\text{GSH}}$  (see Table S4 below) are listed in Table S3.

**Table S3.** Partial fractions  $F_{\text{F}}$  and  $F_{\text{H}}$  and overall fraction  $F (= F_{\text{F}} + 2F_{\text{H}})$  of reactive GSH thiolate species in aqueous solution at different pH.

| pH  | $F_{\text{F}}$ | $F_{\text{H}}$        | $F$    |
|-----|----------------|-----------------------|--------|
| 7.2 | 0.0177         | $9.07 \times 10^{-5}$ | 0.0179 |
| 7.4 | 0.0276         | $2.24 \times 10^{-4}$ | 0.0280 |
| 8.0 | 0.0968         | $3.13 \times 10^{-3}$ | 0.103  |
| 8.1 | 0.117          | $4.77 \times 10^{-3}$ | 0.127  |

## Kinetics

The aqueous solution of GSH were mixed with an equal volume of an aqueous KOH (0.04 M). Then, the obtained solution (with  $[\text{OH}^-] = 0.02 \text{ M}$ ) was used to fill one of the reservoir syringes of the stopped-flow spectrometer. After mixing with the electrophile solution, a hydroxide concentration of  $[\text{OH}^-]_0 = 0.01 \text{ M}$  (pH 12) was achieved in the observation cell of the stopped-flow spectrometer.

We assumed quantitative deprotonation of the Gly-COOH, the glutamyl- $\text{NH}_3^+$ , and the cysteine-SH groups in GSH at pH 12, which consumes 3 equivs of hydroxide ions. Under the conditions of the kinetic experiments (pH 12) >99.5% of GSH was deprotonated to the thiolate **H** [that is,  $\text{GSH}(\text{NH}_2/\text{S}^-)$ ]. Likewise, we assumed quantitative deprotonation of the COOH group in AcCys at pH 12, which consumes 1 equiv of hydroxide ions. The remaining  $\text{OH}^-$  concentration was then used to calculate the concentration of the thiolate  $\text{AcCys}^-$  in the reaction mixture from  $\text{p}K_a(\text{AcCys}) 9.62$ <sup>[S6]</sup> according to the method described in ref [S5]. Under the conditions of the kinetic experiments (that is, at pH 12) >99% of the supplied AcCys was deprotonated to the thiolate  $\text{AcCys}^-$ .

By using a high excess of the nucleophilic thiolates  $\text{RS}^-$  ( $\text{GS}^-$  or  $\text{AcCys}^-$ ) over the electrophiles **E**, the concentrations of  $\text{RS}^-$  remained almost constant during the kinetic runs, resulting in mono-exponential decays of the electrophiles' absorptions. First-order rate constants  $k_{\text{obs}}$  ( $\text{s}^{-1}$ ) were obtained by least-squares fitting the single-exponential function  $A_t = A_0 \exp(-k_{\text{obs}}t) + C$  to the time-dependent absorbances (averaged from typically four to eight kinetic runs at each nucleophile concentration).

The contribution of competing nucleophiles ( $\text{H}_2\text{O}$  and  $\text{HO}^-$ ) to the consumption of the electrophiles during their reactions with  $\text{RS}^-$  was found to be negligible (<1% in total, cf Figure S2), which allowed us to directly plot the observed first-order rate constants  $k_{\text{obs}}$  vs  $[\text{RS}^-]$  to derive the second-order rate constant  $k_2$  ( $\text{M}^{-1} \text{s}^{-1}$ ) from the slopes of the resulting linear correlations.



## Kinetics of GSH with cationic and neutral reference electrophiles

**E2** + GSH in alkaline 99.5/0.5 (v/v) H<sub>2</sub>O/CH<sub>3</sub>CN (stopped-flow, detection at 614 nm)

| [E2] <sub>0</sub> ,<br>mol L <sup>-1</sup> | [GSH] <sub>0</sub> ,<br>mol L <sup>-1</sup> | [OH <sup>-</sup> ] <sub>0</sub> ,<br>mol L <sup>-1</sup> | [GS <sup>-</sup> ],<br>mol L <sup>-1</sup> | [OH <sup>-</sup> ],<br>mol L <sup>-1</sup> | k <sub>obs</sub> ,<br>s <sup>-1</sup> |
|--------------------------------------------|---------------------------------------------|----------------------------------------------------------|--------------------------------------------|--------------------------------------------|---------------------------------------|
| 4.38 × 10 <sup>-6</sup>                    | 1.00 × 10 <sup>-4</sup>                     | 1.00 × 10 <sup>-2</sup>                                  | 1.00 × 10 <sup>-4</sup>                    | 9.70 × 10 <sup>-3</sup>                    | 2.47 × 10 <sup>2</sup>                |
| 4.38 × 10 <sup>-6</sup>                    | 2.00 × 10 <sup>-4</sup>                     | 1.00 × 10 <sup>-2</sup>                                  | 2.00 × 10 <sup>-4</sup>                    | 9.40 × 10 <sup>-3</sup>                    | 5.04 × 10 <sup>2</sup>                |
| 4.38 × 10 <sup>-6</sup>                    | 3.00 × 10 <sup>-4</sup>                     | 1.00 × 10 <sup>-2</sup>                                  | 3.00 × 10 <sup>-4</sup>                    | 9.10 × 10 <sup>-3</sup>                    | 8.83 × 10 <sup>2</sup>                |
| 4.38 × 10 <sup>-6</sup>                    | 4.00 × 10 <sup>-4</sup>                     | 1.00 × 10 <sup>-2</sup>                                  | 4.00 × 10 <sup>-4</sup>                    | 8.80 × 10 <sup>-3</sup>                    | 1.02 × 10 <sup>3</sup>                |

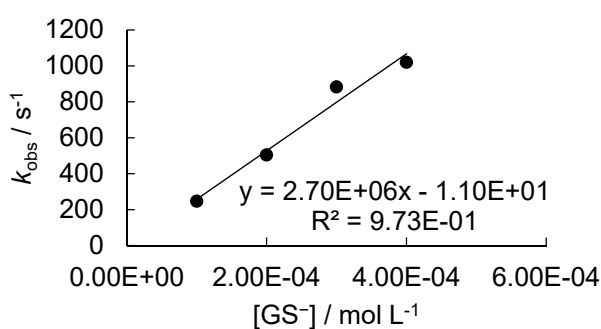

$$k_2 = 2.70 \times 10^6 \text{ M}^{-1} \text{ s}^{-1}$$

**E3** + GSH in alkaline 99.5/0.5 (v/v) H<sub>2</sub>O/CH<sub>3</sub>CN (stopped-flow, detection at 634 nm)

| [E3] <sub>0</sub> ,<br>mol L <sup>-1</sup> | [GSH] <sub>0</sub> ,<br>mol L <sup>-1</sup> | [OH <sup>-</sup> ] <sub>0</sub> ,<br>mol L <sup>-1</sup> | [GS <sup>-</sup> ],<br>mol L <sup>-1</sup> | [OH <sup>-</sup> ],<br>mol L <sup>-1</sup> | k <sub>obs</sub> ,<br>s <sup>-1</sup> |
|--------------------------------------------|---------------------------------------------|----------------------------------------------------------|--------------------------------------------|--------------------------------------------|---------------------------------------|
| 2.32 × 10 <sup>-6</sup>                    | 1.00 × 10 <sup>-4</sup>                     | 1.00 × 10 <sup>-2</sup>                                  | 1.00 × 10 <sup>-4</sup>                    | 9.70 × 10 <sup>-3</sup>                    | 8.41 × 10 <sup>1</sup>                |
| 2.32 × 10 <sup>-6</sup>                    | 2.00 × 10 <sup>-4</sup>                     | 1.00 × 10 <sup>-2</sup>                                  | 2.00 × 10 <sup>-4</sup>                    | 9.40 × 10 <sup>-3</sup>                    | 2.07 × 10 <sup>2</sup>                |
| 2.32 × 10 <sup>-6</sup>                    | 3.00 × 10 <sup>-4</sup>                     | 1.00 × 10 <sup>-2</sup>                                  | 3.00 × 10 <sup>-4</sup>                    | 9.10 × 10 <sup>-3</sup>                    | 3.27 × 10 <sup>2</sup>                |
| 2.32 × 10 <sup>-6</sup>                    | 4.00 × 10 <sup>-4</sup>                     | 1.00 × 10 <sup>-2</sup>                                  | 4.00 × 10 <sup>-4</sup>                    | 8.80 × 10 <sup>-3</sup>                    | 5.00 × 10 <sup>2</sup>                |

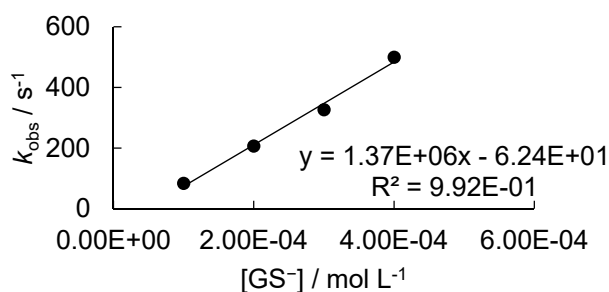

$$k_2 = 1.37 \times 10^6 \text{ M}^{-1} \text{ s}^{-1}$$

**E4 + GSH in alkaline 99.5/0.5 (v/v) H<sub>2</sub>O/CH<sub>3</sub>CN (stopped-flow, detection at 630 nm)**

| [E4] <sub>0</sub> ,<br>mol L <sup>-1</sup> | [GSH] <sub>0</sub> ,<br>mol L <sup>-1</sup> | [OH <sup>-</sup> ] <sub>0</sub> ,<br>mol L <sup>-1</sup> | [GS <sup>-</sup> ],<br>mol L <sup>-1</sup> | [OH <sup>-</sup> ],<br>mol L <sup>-1</sup> | k <sub>obs</sub> ,<br>s <sup>-1</sup> |
|--------------------------------------------|---------------------------------------------|----------------------------------------------------------|--------------------------------------------|--------------------------------------------|---------------------------------------|
| 5.45 × 10 <sup>-6</sup>                    | 1.00 × 10 <sup>-4</sup>                     | 1.00 × 10 <sup>-2</sup>                                  | 1.00 × 10 <sup>-4</sup>                    | 9.70 × 10 <sup>-3</sup>                    | 6.69 × 10 <sup>1</sup>                |
| 5.45 × 10 <sup>-6</sup>                    | 2.00 × 10 <sup>-4</sup>                     | 1.00 × 10 <sup>-2</sup>                                  | 2.00 × 10 <sup>-4</sup>                    | 9.40 × 10 <sup>-3</sup>                    | 1.43 × 10 <sup>2</sup>                |
| 5.45 × 10 <sup>-6</sup>                    | 3.00 × 10 <sup>-4</sup>                     | 1.00 × 10 <sup>-2</sup>                                  | 3.00 × 10 <sup>-4</sup>                    | 9.10 × 10 <sup>-3</sup>                    | 2.06 × 10 <sup>2</sup>                |
| 5.45 × 10 <sup>-6</sup>                    | 4.00 × 10 <sup>-4</sup>                     | 1.00 × 10 <sup>-2</sup>                                  | 4.00 × 10 <sup>-4</sup>                    | 8.80 × 10 <sup>-3</sup>                    | 2.66 × 10 <sup>2</sup>                |

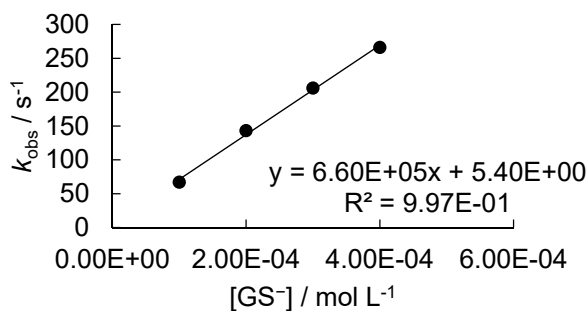

$$k_2 = 6.60 \times 10^5 \text{ M}^{-1} \text{ s}^{-1}$$

**E5 + GSH in alkaline 89/11 (v/v) H<sub>2</sub>O/CH<sub>3</sub>CN (stopped-flow, detection at 396 nm)**

| [E5] <sub>0</sub> ,<br>mol L <sup>-1</sup> | [GSH] <sub>0</sub> ,<br>mol L <sup>-1</sup> | [OH <sup>-</sup> ] <sub>0</sub> ,<br>mol L <sup>-1</sup> | [GS <sup>-</sup> ],<br>mol L <sup>-1</sup> | [OH <sup>-</sup> ],<br>mol L <sup>-1</sup> | k <sub>obs</sub> ,<br>s <sup>-1</sup> |
|--------------------------------------------|---------------------------------------------|----------------------------------------------------------|--------------------------------------------|--------------------------------------------|---------------------------------------|
| 1.03 × 10 <sup>-5</sup>                    | 1.00 × 10 <sup>-4</sup>                     | 1.00 × 10 <sup>-2</sup>                                  | 1.00 × 10 <sup>-4</sup>                    | 9.70 × 10 <sup>-3</sup>                    | 9.01 × 10 <sup>1</sup>                |
| 1.03 × 10 <sup>-5</sup>                    | 2.00 × 10 <sup>-4</sup>                     | 1.00 × 10 <sup>-2</sup>                                  | 2.00 × 10 <sup>-4</sup>                    | 9.40 × 10 <sup>-3</sup>                    | 1.79 × 10 <sup>2</sup>                |
| 1.03 × 10 <sup>-5</sup>                    | 3.00 × 10 <sup>-4</sup>                     | 1.00 × 10 <sup>-2</sup>                                  | 3.00 × 10 <sup>-4</sup>                    | 9.10 × 10 <sup>-3</sup>                    | 2.76 × 10 <sup>2</sup>                |
| 1.03 × 10 <sup>-5</sup>                    | 4.00 × 10 <sup>-4</sup>                     | 1.00 × 10 <sup>-2</sup>                                  | 4.00 × 10 <sup>-4</sup>                    | 8.80 × 10 <sup>-3</sup>                    | 3.78 × 10 <sup>2</sup>                |

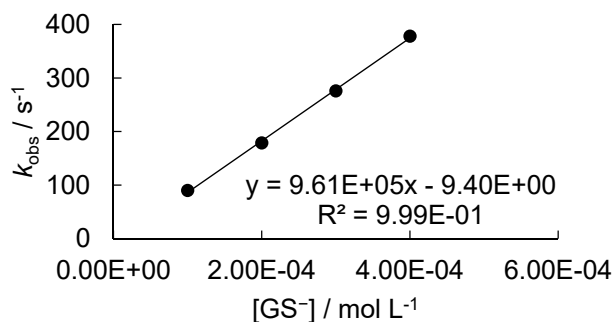

$$k_2 = 9.61 \times 10^5 \text{ M}^{-1} \text{ s}^{-1}$$

**E6 + GSH in alkaline 89/11 (v/v) H<sub>2</sub>O/CH<sub>3</sub>CN (stopped-flow, detection at 504 nm)**

| [E6] <sub>0</sub> ,<br>mol L <sup>-1</sup> | [GSH] <sub>0</sub> ,<br>mol L <sup>-1</sup> | [OH <sup>-</sup> ] <sub>0</sub> ,<br>mol L <sup>-1</sup> | [GS <sup>-</sup> ],<br>mol L <sup>-1</sup> | [OH <sup>-</sup> ],<br>mol L <sup>-1</sup> | k <sub>obs</sub> ,<br>s <sup>-1</sup> |
|--------------------------------------------|---------------------------------------------|----------------------------------------------------------|--------------------------------------------|--------------------------------------------|---------------------------------------|
| 1.21 × 10 <sup>-5</sup>                    | 1.00 × 10 <sup>-4</sup>                     | 1.00 × 10 <sup>-2</sup>                                  | 1.00 × 10 <sup>-4</sup>                    | 9.70 × 10 <sup>-3</sup>                    | 1.14 × 10 <sup>1</sup>                |
| 1.21 × 10 <sup>-5</sup>                    | 2.00 × 10 <sup>-4</sup>                     | 1.00 × 10 <sup>-2</sup>                                  | 2.00 × 10 <sup>-4</sup>                    | 9.40 × 10 <sup>-3</sup>                    | 1.83 × 10 <sup>1</sup>                |
| 1.21 × 10 <sup>-5</sup>                    | 3.00 × 10 <sup>-4</sup>                     | 1.00 × 10 <sup>-2</sup>                                  | 3.00 × 10 <sup>-4</sup>                    | 9.10 × 10 <sup>-3</sup>                    | 2.62 × 10 <sup>1</sup>                |
| 1.21 × 10 <sup>-5</sup>                    | 4.00 × 10 <sup>-4</sup>                     | 1.00 × 10 <sup>-2</sup>                                  | 4.00 × 10 <sup>-4</sup>                    | 8.80 × 10 <sup>-3</sup>                    | 3.41 × 10 <sup>1</sup>                |

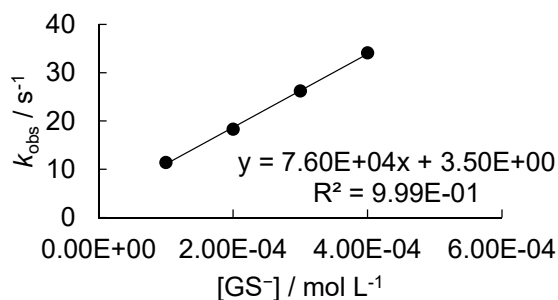

$$k_2 = 7.60 \times 10^4 \text{ M}^{-1} \text{ s}^{-1}$$

**E7 + GSH in alkaline 99.5/0.5 (v/v) H<sub>2</sub>O/CH<sub>3</sub>CN (stopped-flow, detection at 310 nm)**

| [E7] <sub>0</sub> ,<br>mol L <sup>-1</sup> | [GSH] <sub>0</sub> ,<br>mol L <sup>-1</sup> | [OH <sup>-</sup> ] <sub>0</sub> ,<br>mol L <sup>-1</sup> | [GS <sup>-</sup> ],<br>mol L <sup>-1</sup> | [OH <sup>-</sup> ],<br>mol L <sup>-1</sup> | k <sub>obs</sub> ,<br>s <sup>-1</sup> |
|--------------------------------------------|---------------------------------------------|----------------------------------------------------------|--------------------------------------------|--------------------------------------------|---------------------------------------|
| 1.90 × 10 <sup>-5</sup>                    | 1.00 × 10 <sup>-4</sup>                     | 1.00 × 10 <sup>-2</sup>                                  | 1.00 × 10 <sup>-4</sup>                    | 9.70 × 10 <sup>-3</sup>                    | 1.50 × 10 <sup>1</sup>                |
| 1.90 × 10 <sup>-5</sup>                    | 2.00 × 10 <sup>-4</sup>                     | 1.00 × 10 <sup>-2</sup>                                  | 2.00 × 10 <sup>-4</sup>                    | 9.40 × 10 <sup>-3</sup>                    | 3.01 × 10 <sup>1</sup>                |
| 1.90 × 10 <sup>-5</sup>                    | 3.00 × 10 <sup>-4</sup>                     | 1.00 × 10 <sup>-2</sup>                                  | 3.00 × 10 <sup>-4</sup>                    | 9.10 × 10 <sup>-3</sup>                    | 4.65 × 10 <sup>1</sup>                |
| 1.90 × 10 <sup>-5</sup>                    | 4.00 × 10 <sup>-4</sup>                     | 1.00 × 10 <sup>-2</sup>                                  | 4.00 × 10 <sup>-4</sup>                    | 8.80 × 10 <sup>-3</sup>                    | 5.81 × 10 <sup>1</sup>                |

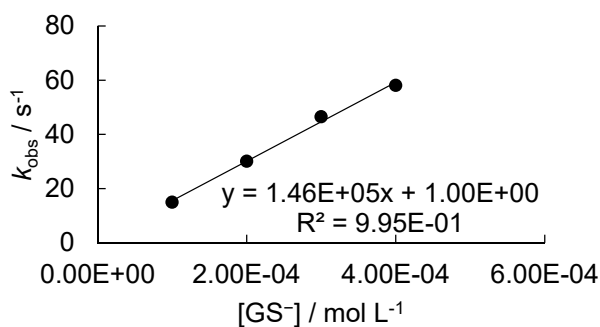

$$k_2 = 1.46 \times 10^5 \text{ M}^{-1} \text{ s}^{-1}$$

**E8 + GSH in alkaline 99.5/0.5 (v/v) H<sub>2</sub>O/CH<sub>3</sub>CN (stopped-flow, detection at 362 nm)**

| [E8] <sub>0</sub> ,<br>mol L <sup>-1</sup> | [GSH] <sub>0</sub> ,<br>mol L <sup>-1</sup> | [OH <sup>-</sup> ] <sub>0</sub> ,<br>mol L <sup>-1</sup> | [GS <sup>-</sup> ],<br>mol L <sup>-1</sup> | [OH <sup>-</sup> ],<br>mol L <sup>-1</sup> | <i>k</i> <sub>obs</sub> ,<br>s <sup>-1</sup> |
|--------------------------------------------|---------------------------------------------|----------------------------------------------------------|--------------------------------------------|--------------------------------------------|----------------------------------------------|
| 1.96 × 10 <sup>-5</sup>                    | 1.00 × 10 <sup>-4</sup>                     | 1.00 × 10 <sup>-2</sup>                                  | 1.00 × 10 <sup>-4</sup>                    | 9.70 × 10 <sup>-3</sup>                    | 3.40                                         |
| 1.96 × 10 <sup>-5</sup>                    | 2.00 × 10 <sup>-4</sup>                     | 1.00 × 10 <sup>-2</sup>                                  | 2.00 × 10 <sup>-4</sup>                    | 9.40 × 10 <sup>-3</sup>                    | 6.83                                         |
| 1.96 × 10 <sup>-5</sup>                    | 3.00 × 10 <sup>-4</sup>                     | 1.00 × 10 <sup>-2</sup>                                  | 3.00 × 10 <sup>-4</sup>                    | 9.10 × 10 <sup>-3</sup>                    | 1.06 × 10 <sup>1</sup>                       |
| 1.96 × 10 <sup>-5</sup>                    | 4.00 × 10 <sup>-4</sup>                     | 1.00 × 10 <sup>-2</sup>                                  | 4.00 × 10 <sup>-4</sup>                    | 8.80 × 10 <sup>-3</sup>                    | 1.42 × 10 <sup>1</sup>                       |

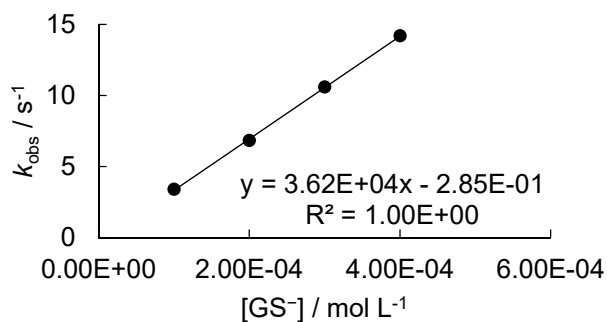

$$k_2 = 3.62 \times 10^4 \text{ M}^{-1} \text{ s}^{-1}$$

**E9 + GSH in alkaline 89/11 (v/v) H<sub>2</sub>O/CH<sub>3</sub>CN (stopped-flow, detection at 487 nm)**

| [E9] <sub>0</sub> ,<br>mol L <sup>-1</sup> | [GSH] <sub>0</sub> ,<br>mol L <sup>-1</sup> | [OH <sup>-</sup> ] <sub>0</sub> ,<br>mol L <sup>-1</sup> | [GS <sup>-</sup> ],<br>mol L <sup>-1</sup> | [OH <sup>-</sup> ],<br>mol L <sup>-1</sup> | <i>k</i> <sub>obs</sub> ,<br>s <sup>-1</sup> |
|--------------------------------------------|---------------------------------------------|----------------------------------------------------------|--------------------------------------------|--------------------------------------------|----------------------------------------------|
| 3.27 × 10 <sup>-5</sup>                    | 1.00 × 10 <sup>-4</sup>                     | 1.00 × 10 <sup>-2</sup>                                  | 1.00 × 10 <sup>-4</sup>                    | 9.70 × 10 <sup>-3</sup>                    | 2.42 × 10 <sup>1</sup>                       |
| 3.27 × 10 <sup>-5</sup>                    | 2.00 × 10 <sup>-4</sup>                     | 1.00 × 10 <sup>-2</sup>                                  | 2.00 × 10 <sup>-4</sup>                    | 9.40 × 10 <sup>-3</sup>                    | 5.16 × 10 <sup>1</sup>                       |
| 3.27 × 10 <sup>-5</sup>                    | 3.00 × 10 <sup>-4</sup>                     | 1.00 × 10 <sup>-2</sup>                                  | 3.00 × 10 <sup>-4</sup>                    | 9.10 × 10 <sup>-3</sup>                    | 7.65 × 10 <sup>1</sup>                       |
| 3.27 × 10 <sup>-5</sup>                    | 4.00 × 10 <sup>-4</sup>                     | 1.00 × 10 <sup>-2</sup>                                  | 4.00 × 10 <sup>-4</sup>                    | 8.80 × 10 <sup>-3</sup>                    | 1.02 × 10 <sup>2</sup>                       |

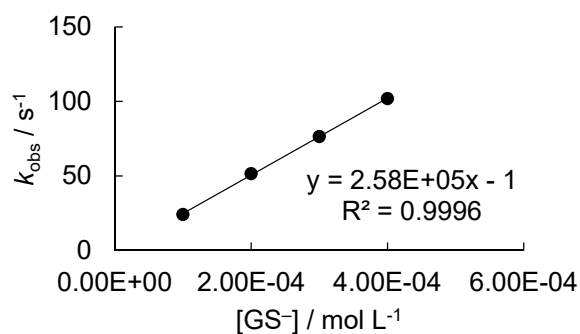

$$k_2 = 2.58 \times 10^5 \text{ M}^{-1} \text{ s}^{-1}$$

**E10 + GSH in alkaline 89/11 (v/v) H<sub>2</sub>O/CH<sub>3</sub>CN (stopped-flow, detection at 512 nm)**

| [E10] <sub>0</sub> ,<br>mol L <sup>-1</sup> | [GSH] <sub>0</sub> ,<br>mol L <sup>-1</sup> | [OH <sup>-</sup> ] <sub>0</sub> ,<br>mol L <sup>-1</sup> | [GS <sup>-</sup> ],<br>mol L <sup>-1</sup> | [OH <sup>-</sup> ],<br>mol L <sup>-1</sup> | k <sub>obs</sub> ,<br>s <sup>-1</sup> |
|---------------------------------------------|---------------------------------------------|----------------------------------------------------------|--------------------------------------------|--------------------------------------------|---------------------------------------|
| 3.36 × 10 <sup>-5</sup>                     | 1.00 × 10 <sup>-4</sup>                     | 1.00 × 10 <sup>-2</sup>                                  | 1.00 × 10 <sup>-4</sup>                    | 9.70 × 10 <sup>-3</sup>                    | 5.19                                  |
| 3.36 × 10 <sup>-5</sup>                     | 2.00 × 10 <sup>-4</sup>                     | 1.00 × 10 <sup>-2</sup>                                  | 2.00 × 10 <sup>-4</sup>                    | 9.40 × 10 <sup>-3</sup>                    | 1.09 × 10 <sup>1</sup>                |
| 3.36 × 10 <sup>-5</sup>                     | 3.00 × 10 <sup>-4</sup>                     | 1.00 × 10 <sup>-2</sup>                                  | 3.00 × 10 <sup>-4</sup>                    | 9.10 × 10 <sup>-3</sup>                    | 1.64 × 10 <sup>1</sup>                |
| 3.36 × 10 <sup>-5</sup>                     | 4.00 × 10 <sup>-4</sup>                     | 1.00 × 10 <sup>-2</sup>                                  | 4.00 × 10 <sup>-4</sup>                    | 8.80 × 10 <sup>-3</sup>                    | 2.20 × 10 <sup>1</sup>                |
| 3.36 × 10 <sup>-5</sup>                     | 5.00 × 10 <sup>-4</sup>                     | 1.00 × 10 <sup>-2</sup>                                  | 5.00 × 10 <sup>-4</sup>                    | 8.50 × 10 <sup>-3</sup>                    | 2.62 × 10 <sup>1</sup>                |

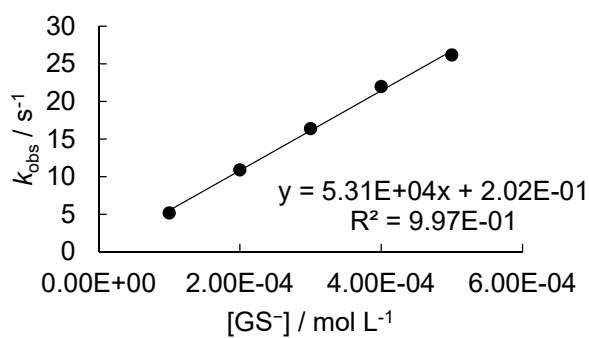

$$k_2 = 5.31 \times 10^4 \text{ M}^{-1} \text{ s}^{-1}$$

## Kinetics of AcCys with cationic and neutral reference electrophiles

**E2 + AcCys** in alkaline 99.5/0.5 (v/v) H<sub>2</sub>O/CH<sub>3</sub>CN (stopped-flow, detection at 614 nm)

| [E2] <sub>0</sub> ,<br>mol L <sup>-1</sup> | [AcCys] <sub>0</sub> ,<br>mol L <sup>-1</sup> | [OH <sup>-</sup> ] <sub>0</sub> ,<br>mol L <sup>-1</sup> | [AcCys <sup>-</sup> ],<br>mol L <sup>-1</sup> | [OH <sup>-</sup> ],<br>mol L <sup>-1</sup> | <i>k</i> <sub>obs</sub> ,<br>s <sup>-1</sup> |
|--------------------------------------------|-----------------------------------------------|----------------------------------------------------------|-----------------------------------------------|--------------------------------------------|----------------------------------------------|
| 3.06 × 10 <sup>-6</sup>                    | 1.00 × 10 <sup>-4</sup>                       | 1.00 × 10 <sup>-2</sup>                                  | 9.96 × 10 <sup>-5</sup>                       | 9.80 × 10 <sup>-3</sup>                    | 1.18 × 10 <sup>2</sup>                       |
| 3.06 × 10 <sup>-6</sup>                    | 2.00 × 10 <sup>-4</sup>                       | 1.00 × 10 <sup>-2</sup>                                  | 1.99 × 10 <sup>-4</sup>                       | 9.60 × 10 <sup>-3</sup>                    | 2.58 × 10 <sup>2</sup>                       |
| 3.06 × 10 <sup>-6</sup>                    | 3.00 × 10 <sup>-4</sup>                       | 1.00 × 10 <sup>-2</sup>                                  | 2.99 × 10 <sup>-4</sup>                       | 9.40 × 10 <sup>-3</sup>                    | 4.16 × 10 <sup>2</sup>                       |
| 3.06 × 10 <sup>-6</sup>                    | 4.00 × 10 <sup>-4</sup>                       | 1.00 × 10 <sup>-2</sup>                                  | 3.98 × 10 <sup>-4</sup>                       | 9.20 × 10 <sup>-3</sup>                    | 5.64 × 10 <sup>2</sup>                       |
| 3.06 × 10 <sup>-6</sup>                    | 5.00 × 10 <sup>-4</sup>                       | 1.00 × 10 <sup>-2</sup>                                  | 4.98 × 10 <sup>-4</sup>                       | 9.00 × 10 <sup>-3</sup>                    | 6.97 × 10 <sup>2</sup>                       |

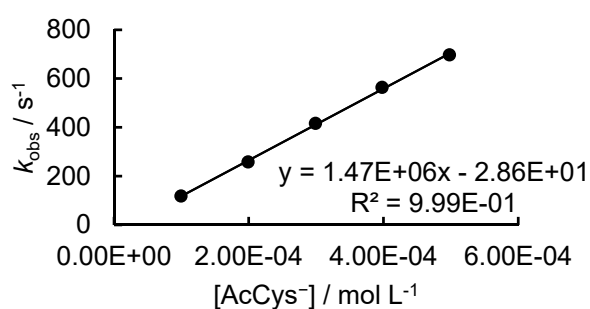

$$k_2 = 1.47 \times 10^6 M^{-1} s^{-1}$$

**E3 + AcCys** in alkaline 99.5/0.5 (v/v) H<sub>2</sub>O/CH<sub>3</sub>CN (stopped-flow, detection at 634 nm)

| [E3] <sub>0</sub> ,<br>mol L <sup>-1</sup> | [AcCys] <sub>0</sub> ,<br>mol L <sup>-1</sup> | [OH <sup>-</sup> ] <sub>0</sub> ,<br>mol L <sup>-1</sup> | [AcCys <sup>-</sup> ],<br>mol L <sup>-1</sup> | [OH <sup>-</sup> ],<br>mol L <sup>-1</sup> | <i>k</i> <sub>obs</sub> ,<br>s <sup>-1</sup> |
|--------------------------------------------|-----------------------------------------------|----------------------------------------------------------|-----------------------------------------------|--------------------------------------------|----------------------------------------------|
| 2.88 × 10 <sup>-6</sup>                    | 1.00 × 10 <sup>-4</sup>                       | 1.00 × 10 <sup>-2</sup>                                  | 9.96 × 10 <sup>-5</sup>                       | 9.80 × 10 <sup>-3</sup>                    | 4.62 × 10 <sup>1</sup>                       |
| 2.88 × 10 <sup>-6</sup>                    | 2.00 × 10 <sup>-4</sup>                       | 1.00 × 10 <sup>-2</sup>                                  | 1.99 × 10 <sup>-4</sup>                       | 9.60 × 10 <sup>-3</sup>                    | 9.28 × 10 <sup>1</sup>                       |
| 2.88 × 10 <sup>-6</sup>                    | 3.00 × 10 <sup>-4</sup>                       | 1.00 × 10 <sup>-2</sup>                                  | 2.99 × 10 <sup>-4</sup>                       | 9.40 × 10 <sup>-3</sup>                    | 1.54 × 10 <sup>2</sup>                       |
| 2.88 × 10 <sup>-6</sup>                    | 4.00 × 10 <sup>-4</sup>                       | 1.00 × 10 <sup>-2</sup>                                  | 3.98 × 10 <sup>-4</sup>                       | 9.20 × 10 <sup>-3</sup>                    | 2.04 × 10 <sup>2</sup>                       |
| 2.88 × 10 <sup>-6</sup>                    | 5.00 × 10 <sup>-4</sup>                       | 1.00 × 10 <sup>-2</sup>                                  | 4.98 × 10 <sup>-4</sup>                       | 9.00 × 10 <sup>-3</sup>                    | 2.68 × 10 <sup>2</sup>                       |

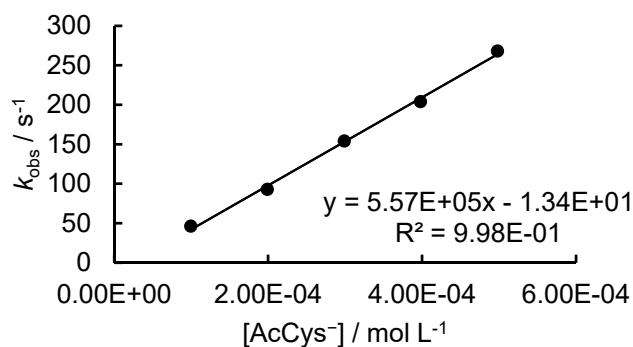

$$k_2 = 5.57 \times 10^5 M^{-1} s^{-1}$$

**E4 + AcCys in alkaline 99.5/0.5 (v/v) H<sub>2</sub>O/CH<sub>3</sub>CN (stopped-flow, detection at 630 nm)**

| [E4] <sub>0</sub> ,<br>mol L <sup>-1</sup> | [AcCys] <sub>0</sub> ,<br>mol L <sup>-1</sup> | [OH <sup>-</sup> ] <sub>0</sub> ,<br>mol L <sup>-1</sup> | [AcCys <sup>-</sup> ],<br>mol L <sup>-1</sup> | [OH <sup>-</sup> ],<br>mol L <sup>-1</sup> | k <sub>obs</sub> ,<br>s <sup>-1</sup> |
|--------------------------------------------|-----------------------------------------------|----------------------------------------------------------|-----------------------------------------------|--------------------------------------------|---------------------------------------|
| 3.24 × 10 <sup>-6</sup>                    | 1.00 × 10 <sup>-4</sup>                       | 1.00 × 10 <sup>-2</sup>                                  | 9.96 × 10 <sup>-5</sup>                       | 9.80 × 10 <sup>-3</sup>                    | 3.31 × 10 <sup>1</sup>                |
| 3.24 × 10 <sup>-6</sup>                    | 2.00 × 10 <sup>-4</sup>                       | 1.00 × 10 <sup>-2</sup>                                  | 1.99 × 10 <sup>-4</sup>                       | 9.60 × 10 <sup>-3</sup>                    | 6.50 × 10 <sup>1</sup>                |
| 3.24 × 10 <sup>-6</sup>                    | 3.00 × 10 <sup>-4</sup>                       | 1.00 × 10 <sup>-2</sup>                                  | 2.99 × 10 <sup>-4</sup>                       | 9.40 × 10 <sup>-3</sup>                    | 1.02 × 10 <sup>2</sup>                |
| 3.24 × 10 <sup>-6</sup>                    | 4.00 × 10 <sup>-4</sup>                       | 1.00 × 10 <sup>-2</sup>                                  | 3.98 × 10 <sup>-4</sup>                       | 9.20 × 10 <sup>-3</sup>                    | 1.37 × 10 <sup>2</sup>                |
| 3.24 × 10 <sup>-6</sup>                    | 5.00 × 10 <sup>-4</sup>                       | 1.00 × 10 <sup>-2</sup>                                  | 4.98 × 10 <sup>-4</sup>                       | 9.00 × 10 <sup>-3</sup>                    | 1.70 × 10 <sup>2</sup>                |

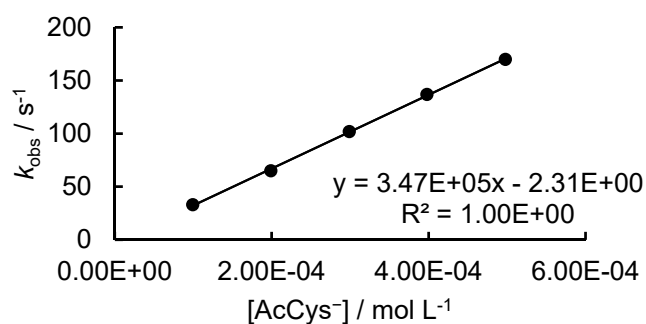

$$k_2 = 3.47 \times 10^5 M^{-1} s^{-1}$$

**E5 + AcCys in alkaline 89/11 (v/v) H<sub>2</sub>O/CH<sub>3</sub>CN (stopped-flow, detection at 396 nm)**

| [E5] <sub>0</sub> ,<br>mol L <sup>-1</sup> | [AcCys] <sub>0</sub> ,<br>mol L <sup>-1</sup> | [OH <sup>-</sup> ] <sub>0</sub> ,<br>mol L <sup>-1</sup> | [AcCys <sup>-</sup> ],<br>mol L <sup>-1</sup> | [OH <sup>-</sup> ],<br>mol L <sup>-1</sup> | k <sub>obs</sub> ,<br>s <sup>-1</sup> |
|--------------------------------------------|-----------------------------------------------|----------------------------------------------------------|-----------------------------------------------|--------------------------------------------|---------------------------------------|
| 3.09 × 10 <sup>-5</sup>                    | 1.00 × 10 <sup>-4</sup>                       | 1.00 × 10 <sup>-2</sup>                                  | 9.96 × 10 <sup>-5</sup>                       | 9.80 × 10 <sup>-3</sup>                    | 5.32 × 10 <sup>1</sup>                |
| 3.09 × 10 <sup>-5</sup>                    | 2.00 × 10 <sup>-4</sup>                       | 1.00 × 10 <sup>-2</sup>                                  | 1.99 × 10 <sup>-4</sup>                       | 9.60 × 10 <sup>-3</sup>                    | 1.08 × 10 <sup>2</sup>                |
| 3.09 × 10 <sup>-5</sup>                    | 3.00 × 10 <sup>-4</sup>                       | 1.00 × 10 <sup>-2</sup>                                  | 2.99 × 10 <sup>-4</sup>                       | 9.40 × 10 <sup>-3</sup>                    | 1.55 × 10 <sup>2</sup>                |
| 3.09 × 10 <sup>-5</sup>                    | 4.00 × 10 <sup>-4</sup>                       | 1.00 × 10 <sup>-2</sup>                                  | 3.98 × 10 <sup>-4</sup>                       | 9.20 × 10 <sup>-3</sup>                    | 2.13 × 10 <sup>2</sup>                |
| 3.09 × 10 <sup>-5</sup>                    | 5.00 × 10 <sup>-4</sup>                       | 1.00 × 10 <sup>-2</sup>                                  | 4.98 × 10 <sup>-4</sup>                       | 9.00 × 10 <sup>-3</sup>                    | 2.60 × 10 <sup>2</sup>                |

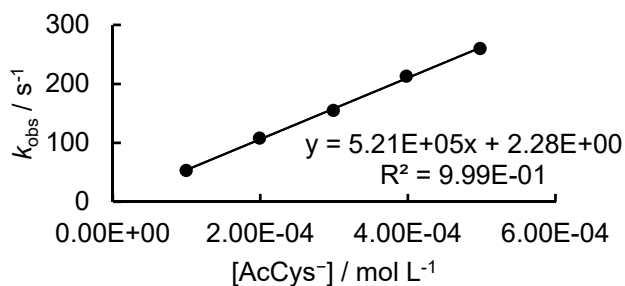

$$k_2 = 5.21 \times 10^5 M^{-1} s^{-1}$$

**E8 + AcCys in alkaline 99.5/0.5 (v/v) H<sub>2</sub>O/CH<sub>3</sub>CN (stopped-flow, detection at 362 nm)**

| [E8] <sub>0</sub> ,<br>mol L <sup>-1</sup> | [AcCys] <sub>0</sub> ,<br>mol L <sup>-1</sup> | [OH <sup>-</sup> ] <sub>0</sub> ,<br>mol L <sup>-1</sup> | [AcCys <sup>-</sup> ],<br>mol L <sup>-1</sup> | [OH <sup>-</sup> ],<br>mol L <sup>-1</sup> | k <sub>obs</sub> ,<br>s <sup>-1</sup> |
|--------------------------------------------|-----------------------------------------------|----------------------------------------------------------|-----------------------------------------------|--------------------------------------------|---------------------------------------|
| 4.30 × 10 <sup>-5</sup>                    | 1.00 × 10 <sup>-4</sup>                       | 1.00 × 10 <sup>-2</sup>                                  | 9.96 × 10 <sup>-5</sup>                       | 9.80 × 10 <sup>-3</sup>                    | 2.60                                  |
| 4.30 × 10 <sup>-5</sup>                    | 2.00 × 10 <sup>-4</sup>                       | 1.00 × 10 <sup>-2</sup>                                  | 1.99 × 10 <sup>-4</sup>                       | 9.60 × 10 <sup>-3</sup>                    | 5.93                                  |
| 4.30 × 10 <sup>-5</sup>                    | 3.00 × 10 <sup>-4</sup>                       | 1.00 × 10 <sup>-2</sup>                                  | 2.99 × 10 <sup>-4</sup>                       | 9.40 × 10 <sup>-3</sup>                    | 8.88                                  |
| 4.30 × 10 <sup>-5</sup>                    | 4.00 × 10 <sup>-4</sup>                       | 1.00 × 10 <sup>-2</sup>                                  | 3.98 × 10 <sup>-4</sup>                       | 9.20 × 10 <sup>-3</sup>                    | 1.22 × 10 <sup>1</sup>                |
| 4.30 × 10 <sup>-5</sup>                    | 5.00 × 10 <sup>-4</sup>                       | 1.00 × 10 <sup>-2</sup>                                  | 4.98 × 10 <sup>-4</sup>                       | 9.00 × 10 <sup>-3</sup>                    | 1.51 × 10 <sup>1</sup>                |

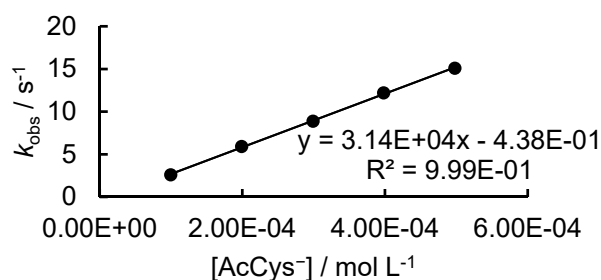

$$k_2 = 3.14 \times 10^4 M^{-1} s^{-1}$$

**E9 + AcCys in alkaline 89/11 (v/v) H<sub>2</sub>O/CH<sub>3</sub>CN (stopped-flow, detection at 487 nm)**

| [E9] <sub>0</sub> ,<br>mol L <sup>-1</sup> | [AcCys] <sub>0</sub> ,<br>mol L <sup>-1</sup> | [OH <sup>-</sup> ] <sub>0</sub> ,<br>mol L <sup>-1</sup> | [AcCys <sup>-</sup> ],<br>mol L <sup>-1</sup> | [OH <sup>-</sup> ],<br>mol L <sup>-1</sup> | k <sub>obs</sub> ,<br>s <sup>-1</sup> |
|--------------------------------------------|-----------------------------------------------|----------------------------------------------------------|-----------------------------------------------|--------------------------------------------|---------------------------------------|
| 3.27 × 10 <sup>-5</sup>                    | 1.00 × 10 <sup>-4</sup>                       | 1.00 × 10 <sup>-2</sup>                                  | 9.96 × 10 <sup>-5</sup>                       | 9.80 × 10 <sup>-3</sup>                    | 2.00 × 10 <sup>1</sup>                |
| 3.27 × 10 <sup>-5</sup>                    | 2.00 × 10 <sup>-4</sup>                       | 1.00 × 10 <sup>-2</sup>                                  | 1.99 × 10 <sup>-4</sup>                       | 9.60 × 10 <sup>-3</sup>                    | 4.03 × 10 <sup>1</sup>                |
| 3.27 × 10 <sup>-5</sup>                    | 3.00 × 10 <sup>-4</sup>                       | 1.00 × 10 <sup>-2</sup>                                  | 2.99 × 10 <sup>-4</sup>                       | 9.40 × 10 <sup>-3</sup>                    | 5.96 × 10 <sup>1</sup>                |
| 3.27 × 10 <sup>-5</sup>                    | 4.00 × 10 <sup>-4</sup>                       | 1.00 × 10 <sup>-2</sup>                                  | 3.98 × 10 <sup>-4</sup>                       | 9.20 × 10 <sup>-3</sup>                    | 7.94 × 10 <sup>1</sup>                |
| 3.27 × 10 <sup>-5</sup>                    | 5.00 × 10 <sup>-4</sup>                       | 1.00 × 10 <sup>-2</sup>                                  | 4.98 × 10 <sup>-4</sup>                       | 9.00 × 10 <sup>-3</sup>                    | 9.80 × 10 <sup>1</sup>                |

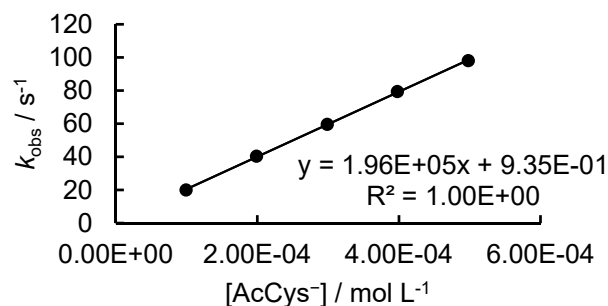

$$k_2 = 1.96 \times 10^5 M^{-1} s^{-1}$$



**E10** + AcCys in alkaline 89/11 (v/v) H<sub>2</sub>O/CH<sub>3</sub>CN (stopped-flow, detection at 512 nm)

| [E10] <sub>0</sub> ,<br>mol L <sup>-1</sup> | [AcCys] <sub>0</sub> ,<br>mol L <sup>-1</sup> | [OH <sup>-</sup> ] <sub>0</sub> ,<br>mol L <sup>-1</sup> | [AcCys <sup>-</sup> ],<br>mol L <sup>-1</sup> | [OH <sup>-</sup> ],<br>mol L <sup>-1</sup> | <i>k</i> <sub>obs</sub> ,<br>s <sup>-1</sup> |
|---------------------------------------------|-----------------------------------------------|----------------------------------------------------------|-----------------------------------------------|--------------------------------------------|----------------------------------------------|
| 3.36 × 10 <sup>-5</sup>                     | 1.00 × 10 <sup>-4</sup>                       | 1.00 × 10 <sup>-2</sup>                                  | 9.96 × 10 <sup>-5</sup>                       | 9.80 × 10 <sup>-3</sup>                    | 4.35                                         |
| 3.36 × 10 <sup>-5</sup>                     | 2.00 × 10 <sup>-4</sup>                       | 1.00 × 10 <sup>-2</sup>                                  | 1.99 × 10 <sup>-4</sup>                       | 9.60 × 10 <sup>-3</sup>                    | 8.85 × 10 <sup>0</sup>                       |
| 3.36 × 10 <sup>-5</sup>                     | 3.00 × 10 <sup>-4</sup>                       | 1.00 × 10 <sup>-2</sup>                                  | 2.99 × 10 <sup>-4</sup>                       | 9.40 × 10 <sup>-3</sup>                    | 1.28 × 10 <sup>1</sup>                       |
| 3.36 × 10 <sup>-5</sup>                     | 4.00 × 10 <sup>-4</sup>                       | 1.00 × 10 <sup>-2</sup>                                  | 3.98 × 10 <sup>-4</sup>                       | 9.20 × 10 <sup>-3</sup>                    | 1.70 × 10 <sup>1</sup>                       |
| 3.36 × 10 <sup>-5</sup>                     | 5.00 × 10 <sup>-4</sup>                       | 1.00 × 10 <sup>-2</sup>                                  | 4.98 × 10 <sup>-4</sup>                       | 9.00 × 10 <sup>-3</sup>                    | 2.08 × 10 <sup>1</sup>                       |

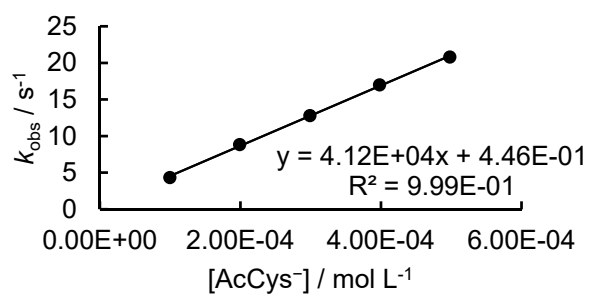

$$k_2 = 4.12 \times 10^4 \text{ M}^{-1} \text{ s}^{-1}$$

## Electrophilicity of Michael Acceptors towards GSH in Kinetic Assays

**Table S4:** Rate constants for reactions of Michael acceptors with GSH from kinetic assays.

| Label                                                   | Michael acceptor                                                                                                 | $k_{\text{GSH}}$<br>( $\text{M}^{-1} \text{s}^{-1}$ ) | pH (T)                     | $k_2(\text{GS}^-)^{[a]}$<br>( $\text{M}^{-1} \text{s}^{-1}$ ) | Estimated<br>$E^{[b]}$ | $\Delta G_{\text{MA}}^{[c]}$<br>( $\text{kJ mol}^{-1}$ ) |
|---------------------------------------------------------|------------------------------------------------------------------------------------------------------------------|-------------------------------------------------------|----------------------------|---------------------------------------------------------------|------------------------|----------------------------------------------------------|
| <b><math>\alpha, \beta</math>-unsaturated aldehydes</b> |                                                                                                                  |                                                       |                            |                                                               |                        |                                                          |
| <b>M1</b>                                               | 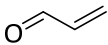<br>acrolein                    | $1.21 \times 10^2$                                    | 7.4 (20 °C) <sup>[d]</sup> | $4.32 \times 10^3$                                            | -14.4                  | -119.0                                                   |
|                                                         |                                                                                                                  | $1.20 \times 10^2$                                    | 7.2 (25 °C) <sup>[e]</sup> |                                                               |                        |                                                          |
|                                                         |                                                                                                                  | 7.28                                                  | 8.0 (25 °C) <sup>[f]</sup> |                                                               |                        |                                                          |
| <b>M2</b>                                               | <br>methacrolein                | 3.38                                                  | 7.4 (25 °C) <sup>[g]</sup> | 121                                                           | -17.2                  | -94.2                                                    |
|                                                         |                                                                                                                  |                                                       |                            |                                                               |                        |                                                          |
| <b>M3</b>                                               | <br>2-ethyl acrolein            | $9.90 \times 10^{-1}$                                 | 7.4 (25 °C) <sup>[g]</sup> | 35.4                                                          | -18.2                  | -93.2                                                    |
|                                                         |                                                                                                                  |                                                       |                            |                                                               |                        |                                                          |
| <b>M4</b>                                               | <br>cinnamaldehyde             | $9.15 \times 10^{-2}$                                 | 7.4 (25 °C) <sup>[g]</sup> | 3.27                                                          | -20.0                  | -94.9                                                    |
|                                                         |                                                                                                                  |                                                       |                            |                                                               |                        |                                                          |
| <b>M5</b>                                               | <br>crotonaldehyde            | $7.85 \times 10^{-1}$                                 | 7.4 (20 °C) <sup>[d]</sup> | 28.0                                                          | -18.4                  | -91.6                                                    |
|                                                         |                                                                                                                  | $7.2 \times 10^{-1}$                                  | 7.2 (25 °C) <sup>[e]</sup> |                                                               |                        |                                                          |
|                                                         |                                                                                                                  | 2.67                                                  | 8.0 (25 °C) <sup>[f]</sup> |                                                               |                        |                                                          |
| <b>M6</b>                                               | <br>trans-2-methyl-2-butenal  | $7.90 \times 10^{-3}$                                 | 7.4 (25 °C) <sup>[g]</sup> | $2.82 \times 10^{-1}$                                         | -22.0                  | -66.8                                                    |
|                                                         |                                                                                                                  |                                                       |                            |                                                               |                        |                                                          |
| <b>M7</b>                                               | <br>3-methyl-2-butenal        | $2.85 \times 10^{-2}$                                 | 7.4 (25 °C) <sup>[g]</sup> | 1.02                                                          | -21.0                  | -68.8                                                    |
|                                                         |                                                                                                                  |                                                       |                            |                                                               |                        |                                                          |
| <b>M8</b>                                               | <br>2-pentenal                | $4.71 \times 10^{-1}$                                 | 7.4 (20 °C) <sup>[d]</sup> | 16.8                                                          | -18.8                  | -87.3                                                    |
|                                                         |                                                                                                                  | $4.72 \times 10^{-1}$                                 | 7.4 (25 °C) <sup>[g]</sup> |                                                               |                        |                                                          |
|                                                         |                                                                                                                  | 1.5                                                   | 8.0 (25 °C) <sup>[f]</sup> |                                                               |                        |                                                          |
| <b>M9</b>                                               | <br>trans-2-methyl-2-pentenal | $4.57 \times 10^{-3}$                                 | 7.4 (25 °C) <sup>[g]</sup> | $1.63 \times 10^{-1}$                                         | -22.4                  | -62.5                                                    |
|                                                         |                                                                                                                  |                                                       |                            |                                                               |                        |                                                          |
| <b>M10</b>                                              | <br>4-methyl-2-pentenal       | $1.77 \times 10^{-1}$                                 | 7.4 (25 °C) <sup>[g]</sup> | 6.31                                                          | -19.5                  | -78.0                                                    |
|                                                         |                                                                                                                  |                                                       |                            |                                                               |                        |                                                          |
| <b>M11</b>                                              | <br>4-hydroxy-2-pentenal      | 2.19                                                  | 7.4 (20 °C) <sup>[d]</sup> | 78.2                                                          | -17.6                  | -115.2                                                   |
|                                                         |                                                                                                                  |                                                       |                            |                                                               |                        |                                                          |

|            |                                                                                                                           |                                                                                                 |                                                                                                                      |      |       |        |
|------------|---------------------------------------------------------------------------------------------------------------------------|-------------------------------------------------------------------------------------------------|----------------------------------------------------------------------------------------------------------------------|------|-------|--------|
| <b>M12</b> | 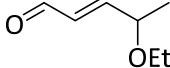<br>4-ethoxy-2-pentenal                  | 1.83                                                                                            | 7.4 (20 °C) <sup>[d]</sup>                                                                                           | 65.4 | -17.7 | -85.0  |
| <b>M13</b> | <br>2-hexenal                            | $3.30 \times 10^{-1}$<br>$4.18 \times 10^{-1}$<br>$3.40 \times 10^{-1}$<br>$9.0 \times 10^{-1}$ | 7.4 (20 °C) <sup>[d]</sup><br>7.4 (25 °C) <sup>[g]</sup><br>7.2 (25 °C) <sup>[e]</sup><br>8.0 (25 °C) <sup>[f]</sup> | 11.8 | -19.0 | -85.7  |
| <b>M14</b> | <br>4-hydroxy-2-hexenal                  | 1.56                                                                                            | 7.4 (20 °C) <sup>[d]</sup>                                                                                           | 55.7 | -17.8 | -109.7 |
| <b>M15</b> | <br>(E)-4-hydroxy-4,5-dimethylhex-2-enal | $3.57 \times 10^{-2}$                                                                           | 7.4 (20 °C) <sup>[d]</sup>                                                                                           | 1.28 | -20.8 | -93.4  |
| <b>M16</b> | <br>2-heptenal                           | $9.3 \times 10^{-1}$                                                                            | 8.0 (25 °C) <sup>[f]</sup>                                                                                           | 9.0  | -19.2 | -85.2  |
| <b>M17</b> | <br>4-hydroxy-2-heptenal                | 1.83                                                                                            | 7.4 (20 °C) <sup>[d]</sup>                                                                                           | 65.4 | -17.7 | -109.4 |
| <b>M18</b> | <br>trans-2-octenal                    | $3.00 \times 10^{-1}$<br>$2.8 \times 10^{-1}$<br>$7.2 \times 10^{-1}$                           | 7.4 (25 °C) <sup>[g]</sup><br>7.2 (25 °C) <sup>[e]</sup><br>8.0 (25 °C) <sup>[f]</sup>                               | 10.7 | -19.1 | -85.1  |
| <b>M19</b> | <br>4-hydroxy-2-octenal                | 1.74                                                                                            | 7.4 (20 °C) <sup>[d]</sup>                                                                                           | 62.1 | -17.7 | -109.0 |
| <b>M20</b> | <br>citral                             | $3.23 \times 10^{-2}$<br>$3.3 \times 10^{-2}$                                                   | 7.4 (20 °C) <sup>[d]</sup><br>8.0 (25 °C) <sup>[f]</sup>                                                             | 1.15 | -20.9 | -59.5  |
| <b>M21</b> | <br>trans-2-nonenal                    | $2.52 \times 10^{-1}$<br>$6.5 \times 10^{-1}$                                                   | 7.4 (25 °C) <sup>[g]</sup><br>8.0 (25 °C) <sup>[f]</sup>                                                             | 8.99 | -19.3 | -81.5  |
| <b>M22</b> | <br>4-hydroxy-2-nonenal                | 1.09                                                                                            | 7.4 (20 °C) <sup>[d]</sup>                                                                                           | 38.9 | -18.1 | -112.3 |
| <b>M23</b> | <br>trans-2-cis-6-nonadienal           | $3.80 \times 10^{-1}$<br>$5.7 \times 10^{-1}$<br>1.1                                            | 7.4 (25 °C) <sup>[g]</sup><br>7.2 (25 °C) <sup>[e]</sup><br>8.0 (25 °C) <sup>[f]</sup>                               | 13.6 | -18.9 | -87.3  |
| <b>M24</b> | <br>trans-2-decenal                    | $1.68 \times 10^{-1}$                                                                           | 7.4 (25 °C) <sup>[g]</sup>                                                                                           | 6.01 | -19.6 | -85.1  |

|            |                                                                                   |      |                            |      |       |        |
|------------|-----------------------------------------------------------------------------------|------|----------------------------|------|-------|--------|
| <b>M25</b> | 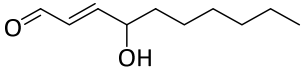 | 1.96 | 7.4 (20 °C) <sup>[d]</sup> | 70.0 | -17.6 | -107.1 |
|            | 4-hydroxy-2-decenal                                                               |      |                            |      |       |        |
| <b>M26</b> |  | 1.47 | 7.4 (20 °C) <sup>[d]</sup> | 52.5 | -17.9 | -109.7 |
|            | 4-hydroxy-2-undecenal                                                             |      |                            |      |       |        |
| <b>M27</b> |  | 2.44 | 7.4 (20 °C) <sup>[d]</sup> | 87.1 | -17.5 | -106.8 |
|            | 4-hydroxy-2-dodecenal                                                             |      |                            |      |       |        |
| <b>M28</b> |  | 8.12 | 7.4 (25 °C) <sup>[g]</sup> | 290  | -16.5 | -111.0 |
|            | 2-octynal                                                                         |      |                            |      |       |        |
| <b>M29</b> |  | 7.43 | 7.4 (25 °C) <sup>[g]</sup> | 265  | -16.6 | -121.0 |
|            | phenyl propiolaldehyde                                                            |      |                            |      |       |        |

### $\alpha,\beta$ -unsaturated ketones

|            |                                                                                     |                       |                            |                       |                      |                       |
|------------|-------------------------------------------------------------------------------------|-----------------------|----------------------------|-----------------------|----------------------|-----------------------|
| <b>E11</b> | 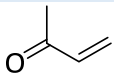   | $3.19 \times 10^1$    | 7.4 (20 °C) <sup>[d]</sup> | $1.14 \times 10^3$    | -16.8 <sup>[h]</sup> | -104.2 <sup>[h]</sup> |
|            | methyl vinylketone                                                                  |                       |                            |                       |                      |                       |
| <b>M30</b> |   | $2.10 \times 10^1$    | 7.4 (25 °C) <sup>[g]</sup> | 751                   | -15.8                | -99.3                 |
|            | 1-penten-3-one                                                                      |                       |                            |                       |                      |                       |
| <b>M31</b> |  | $1.96 \times 10^1$    | 7.4 (25 °C) <sup>[g]</sup> | 698                   | -15.8                | -99.7                 |
|            | 1-hexen-3-one                                                                       |                       |                            |                       |                      |                       |
| <b>M32</b> |  | $1.79 \times 10^1$    | 7.4 (25 °C) <sup>[g]</sup> | 639                   | -15.9                | -99.0                 |
|            | 1-octen-3-one                                                                       |                       |                            |                       |                      |                       |
| <b>M33</b> |  | $6.00 \times 10^{-1}$ | 7.4 (20 °C) <sup>[d]</sup> | 21.4                  | -18.6                | -72.6                 |
|            | 3-methyl-3-buten-2-one                                                              |                       |                            |                       |                      |                       |
| <b>M34</b> |  | $4.03 \times 10^{-1}$ | 7.4 (25 °C) <sup>[g]</sup> | 14.4                  | -18.9                | -74.9                 |
|            | 4-hexen-3-one                                                                       |                       |                            |                       |                      |                       |
| <b>M35</b> |  | $4.35 \times 10^{-1}$ | 7.4 (25 °C) <sup>[g]</sup> | 15.5                  | -18.8                | -74.8                 |
|            | 2-octen-4-one                                                                       |                       |                            |                       |                      |                       |
| <b>M36</b> |  | $1.30 \times 10^{-2}$ | 7.4 (25 °C) <sup>[g]</sup> | $4.64 \times 10^{-1}$ | -21.6                | -51.0                 |
|            | 3-methyl-3-penten-2-one                                                             |                       |                            |                       |                      |                       |
| <b>M37</b> |  | $4.45 \times 10^{-1}$ | 7.4 (25 °C) <sup>[g]</sup> | 15.9                  | -18.8                | -79.5                 |
|            | 3-penten-2-one                                                                      |                       |                            |                       |                      |                       |
| <b>M38</b> |  | $2.08 \times 10^{-1}$ | 7.4 (25 °C) <sup>[g]</sup> | 7.44                  | -19.4                | -73.7                 |
|            | 3-hexen-2-one                                                                       |                       |                            |                       |                      |                       |

|     |                             |                                                |                                                          |                       |       |        |
|-----|-----------------------------|------------------------------------------------|----------------------------------------------------------|-----------------------|-------|--------|
| M39 | 3-hepten-2-one<br>          | $1.90 \times 10^{-1}$                          | 7.4 (25 °C) <sup>[g]</sup>                               | 6.79                  | -19.5 | -73.5  |
| M40 | 3-octen-2-one<br>           | $1.80 \times 10^{-1}$                          | 7.4 (25 °C) <sup>[g]</sup>                               | 6.43                  | -19.5 | -75.4  |
| M41 | 3-nonen-2-one<br>           | $2.30 \times 10^{-3}$<br>$3.47 \times 10^{-3}$ | 7.4 (20 °C) <sup>[d]</sup><br>7.4 (25 °C) <sup>[g]</sup> | $8.21 \times 10^{-2}$ | -22.9 | -58.6  |
| M42 | mesityl oxide<br>           | 7.62                                           | 7.4 (25 °C) <sup>[i]</sup>                               | 272                   | -16.6 | -139.5 |
| M43 | 3-butyne-2-one<br>          | 1.33                                           | 7.4 (25 °C) <sup>[g]</sup>                               | 47.6                  | -17.9 | -92.9  |
| M44 | 3-hexyn-2-one<br>           | 5.03                                           | 7.4 (25 °C) <sup>[i]</sup>                               | 180                   | -16.9 | -101.5 |
|     | 4-phenyl-3-butyne-2-one<br> |                                                |                                                          |                       |       |        |

#### $\alpha,\beta$ -unsaturated esters

|     |                              |                       |                            |      |                      |                      |
|-----|------------------------------|-----------------------|----------------------------|------|----------------------|----------------------|
| M45 | <br>vinyl acrylate           | 1.49                  | 7.4 (25 °C) <sup>[i]</sup> | 53.1 | -17.9                | -116.4               |
| M46 | <br>propargyl acrylate       | $8.57 \times 10^{-1}$ | 7.4 (25 °C) <sup>[g]</sup> | 30.6 | -18.3                | -94.2                |
| M47 | <br>allyl acrylate           | $3.27 \times 10^{-1}$ | 7.4 (25 °C) <sup>[g]</sup> | 11.7 | -19.0                | -83.6                |
| M48 | <br>2-hydroxyethyl acrylate  | $3.32 \times 10^{-1}$ | 7.4 (25 °C) <sup>[g]</sup> | 11.8 | -19.0                | -100.3               |
| M49 | <br>2-hydroxypropyl acrylate | $3.00 \times 10^{-1}$ | 7.4 (25 °C) <sup>[g]</sup> | 10.7 | -19.1                | -98.6                |
| E12 | <br>methyl acrylate          | $1.90 \times 10^{-1}$ | 7.4 (25 °C) <sup>[g]</sup> | 6.79 | -18.8 <sup>[h]</sup> | -80.7 <sup>[h]</sup> |
| E13 | <br>ethyl acrylate           | $1.77 \times 10^{-1}$ | 7.4 (25 °C) <sup>[g]</sup> | 6.31 | -19.1 <sup>[h]</sup> | -75.1 <sup>[h]</sup> |

|            |                                                                                     |                       |                            |                       |                      |                      |
|------------|-------------------------------------------------------------------------------------|-----------------------|----------------------------|-----------------------|----------------------|----------------------|
| <b>M50</b> | 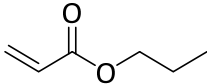   | $1.70 \times 10^{-1}$ | 7.4 (25 °C) <sup>[g]</sup> | 6.07                  | -19.6                | -75.1                |
|            | n-propyl acrylate                                                                   |                       |                            |                       |                      |                      |
| <b>M51</b> |    | $1.57 \times 10^{-1}$ | 7.4 (25 °C) <sup>[g]</sup> | 5.60                  | -19.6                | -77.3                |
|            | iso-butyl acrylate                                                                  |                       |                            |                       |                      |                      |
| <b>M52</b> |    | $1.42 \times 10^{-1}$ | 7.4 (25 °C) <sup>[g]</sup> | 5.08                  | -19.7                | -74.3                |
|            | n-butyl acrylate                                                                    |                       |                            |                       |                      |                      |
| <b>M53</b> |    | $1.32 \times 10^{-1}$ | 7.4 (25 °C) <sup>[i]</sup> | 4.73                  | -19.8                | -74.1                |
|            | hexyl acrylate                                                                      |                       |                            |                       |                      |                      |
| <b>E14</b> |    | $4.17 \times 10^{-2}$ | 7.4 (25 °C) <sup>[g]</sup> | 1.49                  | -20.2 <sup>[h]</sup> | -71.6 <sup>[h]</sup> |
|            | tert-butyl acrylate                                                                 |                       |                            |                       |                      |                      |
| <b>M54</b> |    | $3.67 \times 10^{-3}$ | 7.4 (25 °C) <sup>[g]</sup> | $1.31 \times 10^{-1}$ | -22.6                | -70.4                |
|            | propargyl methacrylate                                                              |                       |                            |                       |                      |                      |
| <b>M55</b> |  | $1.52 \times 10^{-2}$ | 7.4 (25 °C) <sup>[i]</sup> | $5.43 \times 10^{-1}$ | -21.4                | -58.2                |
|            | allyl methacrylate                                                                  |                       |                            |                       |                      |                      |
| <b>M56</b> |  | $2.90 \times 10^{-3}$ | 7.4 (25 °C) <sup>[i]</sup> | $1.03 \times 10^{-1}$ | -22.7                | -78.8                |
|            | 2-hydroxyethyl methacrylate                                                         |                       |                            |                       |                      |                      |
| <b>M57</b> |  | $1.56 \times 10^{-2}$ | 7.4 (25 °C) <sup>[i]</sup> | $5.56 \times 10^{-1}$ | -21.4                | -81.2                |
|            | 2-hydroxypropyl methacrylate                                                        |                       |                            |                       |                      |                      |
| <b>M58</b> |  | $1.20 \times 10^{-3}$ | 7.4 (25 °C) <sup>[g]</sup> | $4.29 \times 10^{-2}$ | -23.4                | -57.0                |
|            | methyl methacrylate                                                                 |                       |                            |                       |                      |                      |
| <b>E16</b> |  | $9.67 \times 10^{-4}$ | 7.4 (25 °C) <sup>[g]</sup> | $3.45 \times 10^{-2}$ | -22.8 <sup>[h]</sup> | -51.9 <sup>[h]</sup> |
|            | ethyl methacrylate                                                                  |                       |                            |                       |                      |                      |

|            |                                                                                     |                                                |                                                          |                       |                      |                      |
|------------|-------------------------------------------------------------------------------------|------------------------------------------------|----------------------------------------------------------|-----------------------|----------------------|----------------------|
| <b>M59</b> | 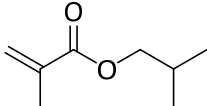   | $6.05 \times 10^{-3}$                          | 7.4 (25 °C) <sup>[i]</sup>                               | $2.16 \times 10^{-1}$ | -22.2                | -51.0                |
|            | isobutyl methacrylate                                                               |                                                |                                                          |                       |                      |                      |
| <b>M60</b> |    | $2.30 \times 10^{-2}$                          | 7.4 (25 °C) <sup>[i]</sup>                               | $8.22 \times 10^{-1}$ | -21.1                | -90.7                |
|            | vinyl crotonate                                                                     |                                                |                                                          |                       |                      |                      |
| <b>M61</b> |    | $2.73 \times 10^{-3}$                          | 7.4 (25 °C) <sup>[g]</sup>                               | $9.76 \times 10^{-2}$ | -22.8                | -55.8                |
|            | methyl crotonate                                                                    |                                                |                                                          |                       |                      |                      |
| <b>E17</b> |    | $3.10 \times 10^{-3}$<br>$2.68 \times 10^{-3}$ | 7.4 (20 °C) <sup>[d]</sup><br>7.4 (25 °C) <sup>[g]</sup> | $1.11 \times 10^{-1}$ | -23.6 <sup>[h]</sup> | -49.8 <sup>[h]</sup> |
|            | ethyl crotonate                                                                     |                                                |                                                          |                       |                      |                      |
| <b>M62</b> |    | $3.63 \times 10^{-2}$                          | 7.4 (25 °C) <sup>[g]</sup>                               | 1.30                  | -20.8                | -50.5                |
|            | methyl trans-2-hexenoate                                                            |                                                |                                                          |                       |                      |                      |
| <b>M63</b> |    | $1.31 \times 10^{-2}$                          | 7.4 (25 °C) <sup>[g]</sup>                               | $4.67 \times 10^{-1}$ | -21.6                | -50.2                |
|            | methyl trans-2-octenoate                                                            |                                                |                                                          |                       |                      |                      |
| <b>M64</b> |  | $1.17 \times 10^{-4}$                          | 7.4 (25 °C) <sup>[g]</sup>                               | $4.17 \times 10^{-3}$ | -25.3                | -41.4                |
|            | methyl tiglate                                                                      |                                                |                                                          |                       |                      |                      |
| <b>M65</b> |  | 1.95                                           | 7.4 (25 °C) <sup>[g]</sup>                               | 69.6                  | -17.6                | -137.3               |
|            | methyl propiolate                                                                   |                                                |                                                          |                       |                      |                      |
| <b>M66</b> |  | 1.75                                           | 7.4 (25 °C) <sup>[g]</sup>                               | 62.5                  | -17.7                | -133.9               |
|            | ethyl propiolate                                                                    |                                                |                                                          |                       |                      |                      |
| <b>M67</b> |  | 1.04                                           | 7.4 (25 °C) <sup>[g]</sup>                               | 37.3                  | -18.1                | -121.7               |
|            | tert-butyl propiolate                                                               |                                                |                                                          |                       |                      |                      |
| <b>M68</b> |  | $4.03 \times 10^{-2}$                          | 7.4 (25 °C) <sup>[g]</sup>                               | 1.44                  | -20.7                | -88.8                |
|            | ethyl 2-butynoate                                                                   |                                                |                                                          |                       |                      |                      |
| <b>M69</b> |  | $9.50 \times 10^{-2}$                          | 7.4 (25 °C) <sup>[g]</sup>                               | 3.39                  | -20.0                | -87.4                |
|            | methyl 2-hexynoate                                                                  |                                                |                                                          |                       |                      |                      |
| <b>M70</b> |  | $6.95 \times 10^{-2}$                          | 7.4 (25 °C) <sup>[i]</sup>                               | 2.48                  | -20.3                | -87.3                |
|            | ethyl hex-2-ynoate                                                                  |                                                |                                                          |                       |                      |                      |

|                                  |                                                                                   |                       |                            |                       |                      |                       |
|----------------------------------|-----------------------------------------------------------------------------------|-----------------------|----------------------------|-----------------------|----------------------|-----------------------|
| <b>M71</b>                       | 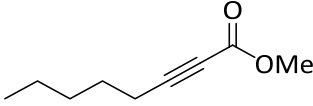 | $4.60 \times 10^{-2}$ | 7.4 (25 °C) <sup>[g]</sup> | 1.64                  | -20.6                | -89.6                 |
|                                  | methyl 2-octynoate                                                                |                       |                            |                       |                      |                       |
| <b>further Michael acceptors</b> |                                                                                   |                       |                            |                       |                      |                       |
| <b>M72</b>                       |  | $9.27 \times 10^{-3}$ | 7.4 (25 °C) <sup>[g]</sup> | $3.31 \times 10^{-1}$ | -21.8                | -66.5                 |
|                                  | acrylamide                                                                        |                       |                            |                       |                      |                       |
| <b>E15</b>                       |  | $1.73 \times 10^{-1}$ | 8.1 (30 °C) <sup>[j]</sup> | 1.36                  | -19.1 <sup>[h]</sup> | -109.4 <sup>[h]</sup> |
|                                  | acrylonitrile                                                                     |                       |                            |                       |                      |                       |
| <b>M73</b>                       |  | $3.48 \times 10^{-2}$ | 7.4 (25 °C) <sup>[i]</sup> | 1.24                  | -20.8                | -62.8                 |
|                                  | 2-vinylpyridine                                                                   |                       |                            |                       |                      |                       |

<sup>[a]</sup> Calculated by using Equation 2 (main text). <sup>[b]</sup> Calculated by using equation 1 (main text),  $\lg k_2(GS^-)$ , and the reactivity parameters for  $GS^-$  ( $N = 20.97$ ,  $s_N = 0.555$ ). <sup>[c]</sup> For details of the quantum-chemical calculation of methyl anion affinities  $\Delta G_{MA}$  see Table S5. <sup>[d]</sup> From ref [S7a]. <sup>[e]</sup> From ref [S7b]. <sup>[f]</sup> From ref [S7c]. <sup>[g]</sup> From ref [S8]. <sup>[h]</sup> From ref [S10c]. <sup>[i]</sup> From ref [S9]. <sup>[j]</sup> From ref [S2].



## Quantum-Chemically Calculated Methyl Anion Affinities ( $\Delta G_{MA}$ ) of Michael Acceptors

Gas phase methyl anion affinities  $\Delta G_{MA}$  were calculated as described in ref<sup>[S10]</sup> as negative Gibbs free energies at 298.15 K for the reactions of Michael acceptors (from Table S4) with the methyl anion:

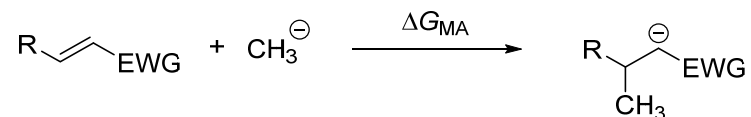

All structures were subjected to a conformational search employing the OPLS-3<sup>[S11]</sup> force field in gas phase with the MCMM method as implemented in Macromodel 2019-1.<sup>[S12]</sup> The 10 conformers with the lowest OPLS-3 energy for every system were subsequently optimized at the B3LYP/6-31G(d,p)<sup>[S13-S15]</sup> level in gas phase. For the optimized structures, single-point gas-phase energies with the B3LYP/6-311++G(3df,2pd)<sup>[S13-S16]</sup> method and single-point solvation energies at the B3LYP/6-31G(d,p) level employing the SMD model for DMSO<sup>[S17]</sup> were calculated. Final Gibbs free energies were obtained by combining the single point energies at the B3LYP/6-311++G(3df,2pd) with the thermochemical corrections at the B3LYP/6-31G(d,p) level and single point solvation energies at the B3LYP/6-31G(d,p) level. Methyl anion affinities were then determined for every electrophile by calculating the reaction energy for the lowest lying conformer. The quantum-mechanical calculations were performed with Gaussian 16, Rev. A.03.<sup>[S18]</sup>

**Table S5:** Quantum-mechanically calculated methyl anion affinities  $\Delta G_{MA}$  for the 1,4-addition to Michael acceptors [in  $\text{kJ mol}^{-1}$ , calculated at the SMD(DMSO)/B3LYP/6-311++G(3df,2pd)//B3LYP/6-31G(d,p) level of theory]

| Michael acceptor | Filename                 | $E_{\text{tot}}$<br>(B3LYP/6-31G(d,p)) | $G_{298}$   | $E_{\text{tot, solv.}}$<br>(SMD(DMSO)/B3LYP/6-31G(d,p)// B3LYP/6-31G(d,p)) | $E_{\text{tot, high.}}$<br>(B3LYP/6-311++G(3df,2pd)// B3LYP/6-31G(d,p)) | $\Delta G$ | $\Delta G_{\text{solv}}$ | $G_{298}$<br>(SMD(DMSO)/B3LYP/6-311++G(3df,2pd)// B3LYP/6-31G(d,p)) |
|------------------|--------------------------|----------------------------------------|-------------|----------------------------------------------------------------------------|-------------------------------------------------------------------------|------------|--------------------------|---------------------------------------------------------------------|
|                  | Methyl anion             | -39.796028                             | -39.787379  | -39.921582                                                                 | -39.856638                                                              | 0.008649   | -0.125554                | -39.973543                                                          |
| <b>M1</b>        | REDO_i1_1                | -191.918015                            | -191.882803 | -191.924399                                                                | -191.988117                                                             | 0.035212   | -0.006383                | -191.959289                                                         |
|                  | REDO_i1_me_1             | -231.853632                            | -231.784191 | -231.943587                                                                | -231.957660                                                             | 0.069441   | -0.089955                | -231.978175                                                         |
|                  | $\Delta G_{MA}$ [kJ/mol] |                                        |             |                                                                            |                                                                         |            |                          | -119.0                                                              |
| <b>M2</b>        | REDO_c3_1                | -231.242222                            | -231.181138 | -231.247954                                                                | -231.322077                                                             | 0.061084   | -0.005733                | -231.266726                                                         |
|                  | REDO_c3_me_1             | -271.175466                            | -271.079880 | -271.260892                                                                | -271.286296                                                             | 0.095586   | -0.085426                | -271.276136                                                         |
|                  | $\Delta G_{MA}$ [kJ/mol] |                                        |             |                                                                            |                                                                         |            |                          | -94.2                                                               |
| <b>M3</b>        | REDO_c4_2                | -270.558038                            | -270.470110 | -270.564109                                                                | -270.648129                                                             | 0.087928   | -0.006072                | -270.566273                                                         |
|                  | REDO_c4_me_1             | -310.492882                            | -310.371014 | -310.576525                                                                | -310.613557                                                             | 0.121868   | -0.083643                | -310.575331                                                         |
|                  | $\Delta G_{MA}$ [kJ/mol] |                                        |             |                                                                            |                                                                         |            |                          | -93.2                                                               |
| <b>M4</b>        | REDO_d5_2                | -422.980777                            | -422.871238 | -422.992696                                                                | -423.116060                                                             | 0.109539   | -0.011919                | -423.018440                                                         |
|                  | REDO_d5_me_1             | -462.922634                            | -462.778142 | -463.006667                                                                | -463.088570                                                             | 0.144492   | -0.084033                | -463.028111                                                         |
|                  | $\Delta G_{MA}$ [kJ/mol] |                                        |             |                                                                            |                                                                         |            |                          | -94.9                                                               |
| <b>M5</b>        | REDO_i2_1                | -231.242908                            | -231.181824 | -231.250957                                                                | -231.323428                                                             | 0.061084   | -0.008048                | -231.270392                                                         |
|                  | REDO_i2_me_1             | -271.172711                            | -271.077290 | -271.260402                                                                | -271.286556                                                             | 0.095421   | -0.087691                | -271.278826                                                         |
|                  | $\Delta G_{MA}$ [kJ/mol] |                                        |             |                                                                            |                                                                         |            |                          | -91.6                                                               |
| <b>M6</b>        | REDO_d8_1                | -270.564682                            | -270.478248 | -270.571891                                                                | -270.654736                                                             | 0.086434   | -0.007209                | -270.575511                                                         |
|                  | REDO_d8_me_1             | -310.492232                            | -310.370375 | -310.576055                                                                | -310.612538                                                             | 0.121857   | -0.083823                | -310.574504                                                         |
|                  | $\Delta G_{MA}$ [kJ/mol] |                                        |             |                                                                            |                                                                         |            |                          | -66.8                                                               |
| <b>M7</b>        | REDO_d7_1                | -270.562109                            | -270.475089 | -270.570839                                                                | -270.652713                                                             | 0.087020   | -0.008730                | -270.574423                                                         |

|            |                          |             |             |             |             |          |           |             |
|------------|--------------------------|-------------|-------------|-------------|-------------|----------|-----------|-------------|
|            | REDO_d7_me_1             | -310.492110 | -310.368810 | -310.575659 | -310.613938 | 0.123300 | -0.083549 | -310.574187 |
|            | $\Delta G_{MA}$ [kJ/mol] |             |             |             |             |          |           | -68.8       |
| <b>M8</b>  | REDO_c5_2                | -270.559083 | -270.471641 | -270.567542 | -270.650239 | 0.087442 | -0.008459 | -270.571256 |
|            | REDO_c5_me_1             | -310.488659 | -310.366958 | -310.575798 | -310.612606 | 0.121701 | -0.087139 | -310.578044 |
|            | $\Delta G_{MA}$ [kJ/mol] |             |             |             |             |          |           | -87.3       |
| <b>M9</b>  | REDO_d9_1                | -309.880666 | -309.767875 | -309.888274 | -309.981348 | 0.112791 | -0.007608 | -309.876165 |
|            | REDO_d9_me_2             | -349.810641 | -349.662218 | -349.892601 | -349.939981 | 0.148423 | -0.081959 | -349.873517 |
|            | $\Delta G_{MA}$ [kJ/mol] |             |             |             |             |          |           | -62.5       |
| <b>M10</b> | REDO_d1_2                | -309.876274 | -309.762585 | -309.884656 | -309.977986 | 0.113689 | -0.008382 | -309.872678 |
|            | REDO_d1_me_3             | -349.806352 | -349.658561 | -349.890765 | -349.939297 | 0.147791 | -0.084413 | -349.875919 |
|            | $\Delta G_{MA}$ [kJ/mol] |             |             |             |             |          |           | -78.0       |
| <b>M11</b> | REDO_j1_5                | -345.769903 | -345.679573 | -345.782967 | -345.895474 | 0.090330 | -0.013064 | -345.818208 |
|            | REDO_j1_me_1             | -385.728671 | -385.601316 | -385.810742 | -385.880908 | 0.127355 | -0.082071 | -385.835624 |
|            | $\Delta G_{MA}$ [kJ/mol] |             |             |             |             |          |           | -115.2      |
| <b>M12</b> | REDO_k2_2                | -424.399116 | -424.257026 | -424.409095 | -424.542253 | 0.142090 | -0.009980 | -424.410143 |
|            | REDO_k2_me_6             | -464.336063 | -464.159079 | -464.419347 | -464.509774 | 0.176984 | -0.083284 | -464.416075 |
|            | $\Delta G_{MA}$ [kJ/mol] |             |             |             |             |          |           | -85.0       |
| <b>M13</b> | REDO_c6_5                | -309.875846 | -309.762144 | -309.884757 | -309.977593 | 0.113702 | -0.008912 | -309.872803 |
|            | REDO_c6_me_1             | -349.808250 | -349.660388 | -349.893620 | -349.941483 | 0.147862 | -0.085370 | -349.878991 |
|            | $\Delta G_{MA}$ [kJ/mol] |             |             |             |             |          |           | -85.7       |
| <b>M14</b> | REDO_j2_1                | -385.086609 | -384.969895 | -385.099891 | -385.222268 | 0.116714 | -0.013282 | -385.118836 |
|            | REDO_j2_me_5             | -425.046221 | -424.892369 | -425.126745 | -425.207475 | 0.153852 | -0.080524 | -425.134147 |
|            | $\Delta G_{MA}$ [kJ/mol] |             |             |             |             |          |           | -109.7      |
| <b>M15</b> | REDO_k1_1                | -463.721092 | -463.551338 | -463.733724 | -463.875862 | 0.169754 | -0.012631 | -463.718740 |
|            | REDO_k1_me_4             | -503.678261 | -503.471030 | -503.754772 | -503.858591 | 0.207231 | -0.076512 | -503.727871 |
|            | $\Delta G_{MA}$ [kJ/mol] |             |             |             |             |          |           | -93.4       |

|            |                          |             |             |             |             |          |           |             |
|------------|--------------------------|-------------|-------------|-------------|-------------|----------|-----------|-------------|
| <b>M16</b> | REDO_heptenal_sm_6       | -349.192414 | -349.052486 | -349.201785 | -349.304745 | 0.139928 | -0.009372 | -349.174188 |
|            | REDO_heptenal_z_me1      | -389.125072 | -388.951038 | -389.210507 | -389.268765 | 0.174034 | -0.085435 | -389.180167 |
|            | $\Delta G_{MA}$ [kJ/mol] |             |             |             |             |          |           | -85.2       |
| <b>M17</b> | REDO_j3_2                | -424.403103 | -424.260133 | -424.416793 | -424.549299 | 0.142970 | -0.013690 | -424.420018 |
|            | REDO_j3_me_5             | -464.363255 | -464.183259 | -464.443591 | -464.534889 | 0.179996 | -0.080336 | -464.435229 |
|            | $\Delta G_{MA}$ [kJ/mol] |             |             |             |             |          |           | -109.4      |
| <b>M18</b> | REDO_c8_6                | -388.508941 | -388.342793 | -388.518748 | -388.631841 | 0.166148 | -0.009807 | -388.475500 |
|            | REDO_c8_me_1             | -428.441839 | -428.241638 | -428.527426 | -428.596065 | 0.200201 | -0.085586 | -428.481451 |
|            | $\Delta G_{MA}$ [kJ/mol] |             |             |             |             |          |           | -85.1       |
| <b>M19</b> | REDO_j4_1                | -463.719708 | -463.550470 | -463.733819 | -463.876493 | 0.169238 | -0.014111 | -463.721366 |
|            | REDO_j4_me_8             | -503.680033 | -503.473806 | -503.760513 | -503.862170 | 0.206227 | -0.080480 | -503.736423 |
|            | $\Delta G_{MA}$ [kJ/mol] |             |             |             |             |          |           | -109.0      |
| <b>M20</b> | REDO_i5_5                | -465.912235 | -465.718285 | -465.923361 | -466.057924 | 0.193950 | -0.011126 | -465.875099 |
|            | REDO_i5_me_3             | -505.847732 | -505.616551 | -505.927987 | -506.022214 | 0.231181 | -0.080255 | -505.871287 |
|            | $\Delta G_{MA}$ [kJ/mol] |             |             |             |             |          |           | -59.5       |
| <b>M21</b> | REDO_c9_6                | -427.825467 | -427.633000 | -427.835713 | -427.958932 | 0.192467 | -0.010246 | -427.776711 |
|            | REDO_c9_me_3             | -467.756998 | -467.530912 | -467.842703 | -467.921660 | 0.226086 | -0.085705 | -467.781280 |
|            | $\Delta G_{MA}$ [kJ/mol] |             |             |             |             |          |           | -81.5       |
| <b>M22</b> | REDO_j5_1                | -503.034905 | -502.839469 | -503.049570 | -503.202112 | 0.195436 | -0.014665 | -503.021341 |
|            | REDO_j5_me_8             | -542.996725 | -542.764285 | -543.077451 | -543.189391 | 0.232440 | -0.080725 | -543.037676 |
|            | $\Delta G_{MA}$ [kJ/mol] |             |             |             |             |          |           | -112.3      |
| <b>M23</b> | REDO_c7_9                | -426.589054 | -426.420075 | -426.600138 | -426.725468 | 0.168979 | -0.011083 | -426.567572 |
|            | REDO_c7_me_6             | -466.521497 | -466.318566 | -466.608479 | -466.690333 | 0.202931 | -0.086982 | -466.574385 |
|            | $\Delta G_{MA}$ [kJ/mol] |             |             |             |             |          |           | -87.3       |
| <b>M24</b> | REDO_d2_3                | -467.141984 | -466.923270 | -467.152666 | -467.286009 | 0.218714 | -0.010682 | -467.077977 |
|            | REDO_d2_me_1             | -507.075054 | -506.822461 | -507.161207 | -507.250380 | 0.252593 | -0.086153 | -507.083940 |
|            | $\Delta G_{MA}$ [kJ/mol] |             |             |             |             |          |           | -85.1       |

|            |                          |             |             |             |             |          |           |             |
|------------|--------------------------|-------------|-------------|-------------|-------------|----------|-----------|-------------|
| <b>M25</b> | REDO_j6_2                | -542.351407 | -542.130080 | -542.365984 | -542.529800 | 0.221327 | -0.014578 | -542.323051 |
|            | REDO_j6_me_1             | -582.311861 | -582.052922 | -582.393036 | -582.515167 | 0.258939 | -0.081175 | -582.337403 |
|            | $\Delta G_{MA}$ [kJ/mol] |             |             |             |             |          |           | -107.1      |
| <b>M26</b> | REDO_j7_2                | -581.670815 | -581.422442 | -581.685464 | -581.858547 | 0.248373 | -0.014649 | -581.624823 |
|            | REDO_j7_me_3             | -621.629888 | -621.344964 | -621.711313 | -621.843637 | 0.284924 | -0.081425 | -621.640138 |
|            | $\Delta G_{MA}$ [kJ/mol] |             |             |             |             |          |           | -109.7      |
| <b>M27</b> | REDO_j8_2                | -620.986526 | -620.712325 | -621.001121 | -621.185797 | 0.274201 | -0.014595 | -620.926191 |
|            | REDO_j8_me_2             | -660.950233 | -660.638070 | -661.030356 | -661.172447 | 0.312163 | -0.080123 | -660.940407 |
|            | $\Delta G_{MA}$ [kJ/mol] |             |             |             |             |          |           | -106.8      |
| <b>M28</b> | REDO_c1_10               | -387.247611 | -387.106584 | -387.257439 | -387.372770 | 0.141027 | -0.009828 | -387.241571 |
|            | REDO_c1_me_3             | -427.188505 | -427.012085 | -427.276907 | -427.345391 | 0.176420 | -0.088402 | -427.257373 |
|            | $\Delta G_{MA}$ [kJ/mol] |             |             |             |             |          |           | -111.0      |
| <b>M29</b> | REDO_c2_2                | -421.726202 | -421.641391 | -421.737083 | -421.864057 | 0.084811 | -0.010882 | -421.790128 |
|            | REDO_c2_me_1_geo         | -461.680011 | -461.559559 | -461.763700 | -461.846506 | 0.120452 | -0.083689 | -461.809743 |
|            | $\Delta G_{MA}$ [kJ/mol] |             |             |             |             |          |           | -121.0      |
| <b>M30</b> | REDO_a1_1                | -270.561057 | -270.473673 | -270.568330 | -270.651156 | 0.087384 | -0.007273 | -270.571045 |
|            | REDO_a1_me_2             | -310.497782 | -310.375663 | -310.583127 | -310.619165 | 0.122119 | -0.085345 | -310.582391 |
|            | $\Delta G_{MA}$ [kJ/mol] |             |             |             |             |          |           | -99.3       |
| <b>M31</b> | REDO_a2_1                | -309.877494 | -309.763885 | -309.885157 | -309.977992 | 0.113609 | -0.007663 | -309.872046 |
|            | REDO_a2_me_1             | -349.815492 | -349.667236 | -349.900267 | -349.947029 | 0.148256 | -0.084775 | -349.883547 |
|            | $\Delta G_{MA}$ [kJ/mol] |             |             |             |             |          |           | -99.7       |
| <b>M32</b> | REDO_a3_1                | -349.194018 | -349.054189 | -349.202152 | -349.305099 | 0.139829 | -0.008134 | -349.173404 |
|            | REDO_a3_me_1             | -389.132468 | -388.958031 | -389.217107 | -389.274442 | 0.174437 | -0.084639 | -389.184644 |
|            | $\Delta G_{MA}$ [kJ/mol] |             |             |             |             |          |           | -99.0       |
| <b>M33</b> | REDO_k4_1                | -270.566698 | -270.479635 | -270.573222 | -270.656490 | 0.087063 | -0.006524 | -270.575951 |
|            | REDO_k4_me_2             | -310.493668 | -310.373137 | -310.577268 | -310.614084 | 0.120531 | -0.083599 | -310.577152 |

|            |                          |             |             |             |             |          |           |             |
|------------|--------------------------|-------------|-------------|-------------|-------------|----------|-----------|-------------|
|            | $\Delta G_{MA}$ [kJ/mol] |             |             |             |             |          |           | -72.6       |
| <b>M34</b> | REDO_a8_1                | -309.886761 | -309.773701 | -309.894743 | -309.986154 | 0.113060 | -0.007983 | -309.881077 |
|            | REDO_a8_me_1             | -349.816660 | -349.668600 | -349.899881 | -349.947975 | 0.148060 | -0.083220 | -349.883136 |
|            | $\Delta G_{MA}$ [kJ/mol] |             |             |             |             |          |           | -74.9       |
| <b>M35</b> | REDO_a6_1                | -388.519660 | -388.354156 | -388.528523 | -388.640032 | 0.165504 | -0.008862 | -388.483390 |
|            | REDO_a6_me_1             | -428.451287 | -428.250883 | -428.533907 | -428.603226 | 0.200404 | -0.082620 | -428.485441 |
|            | $\Delta G_{MA}$ [kJ/mol] |             |             |             |             |          |           | -74.8       |
| <b>M36</b> | REDO_b3_1                | -309.887652 | -309.774991 | -309.895490 | -309.987539 | 0.112661 | -0.007838 | -309.882716 |
|            | REDO_b3_me_1             | -349.810485 | -349.664179 | -349.892164 | -349.940304 | 0.146306 | -0.081679 | -349.875677 |
|            | $\Delta G_{MA}$ [kJ/mol] |             |             |             |             |          |           | -51.0       |
| <b>M37</b> | REDO_a5_2                | -270.567929 | -270.481160 | -270.576801 | -270.658667 | 0.086769 | -0.008871 | -270.580770 |
|            | REDO_a5_me_1             | -310.497079 | -310.375772 | -310.582637 | -310.620354 | 0.121307 | -0.085558 | -310.584604 |
|            | $\Delta G_{MA}$ [kJ/mol] |             |             |             |             |          |           | -79.5       |
| <b>M38</b> | REDO_a9_9                | -349.200855 | -349.061497 | -349.210606 | -349.312785 | 0.139358 | -0.009751 | -349.183178 |
|            | REDO_a9_me_1             | -389.132472 | -388.958878 | -389.215618 | -389.275222 | 0.173594 | -0.083147 | -389.184775 |
|            | $\Delta G_{MA}$ [kJ/mol] |             |             |             |             |          |           | -73.7       |
| <b>M39</b> | REDO_b1_10               | -388.517412 | -388.351807 | -388.527629 | -388.639923 | 0.165605 | -0.010217 | -388.484535 |
|            | REDO_b1_me_1             | -428.449287 | -428.249591 | -428.532540 | -428.602508 | 0.199696 | -0.083253 | -428.486065 |
|            | $\Delta G_{MA}$ [kJ/mol] |             |             |             |             |          |           | -73.5       |
| <b>M40</b> | REDO_b2_10               | -427.835075 | -427.643448 | -427.844884 | -427.966892 | 0.191627 | -0.009810 | -427.785075 |
|            | REDO_b2_me_1             | -467.766057 | -467.540292 | -467.849347 | -467.929818 | 0.225765 | -0.083290 | -467.787343 |
|            | $\Delta G_{MA}$ [kJ/mol] |             |             |             |             |          |           | -75.4       |
| <b>M41</b> | REDO_b4_1                | -309.889482 | -309.777238 | -309.896846 | -309.988608 | 0.112244 | -0.007364 | -309.883728 |
|            | REDO_b4_me_1             | -349.816162 | -349.666903 | -349.897634 | -349.947366 | 0.149259 | -0.081471 | -349.879579 |
|            | $\Delta G_{MA}$ [kJ/mol] |             |             |             |             |          |           | -58.6       |
| <b>M42</b> | REDO_s38_1               | -229.979031 | -229.942369 | -229.986544 | -230.062459 | 0.036662 | -0.007514 | -230.033311 |

|            |                          |             |             |             |             |          |           |             |
|------------|--------------------------|-------------|-------------|-------------|-------------|----------|-----------|-------------|
|            | REDO_s38_me_1            | -269.925383 | -269.853863 | -270.015191 | -270.041716 | 0.071520 | -0.089808 | -270.060004 |
|            | $\Delta G_{MA}$ [kJ/mol] |             |             |             |             |          |           | -139.5      |
| <b>M43</b> | REDO_a4_1                | -269.310353 | -269.249924 | -269.319851 | -269.403699 | 0.060429 | -0.009498 | -269.352768 |
|            | REDO_a4_me_1             | -309.246005 | -309.148475 | -309.334159 | -309.371062 | 0.097530 | -0.088154 | -309.361686 |
|            | $\Delta G_{MA}$ [kJ/mol] |             |             |             |             |          |           | -92.9       |
| <b>M44</b> | REDO_s40_1               | -461.055363 | -460.945369 | -461.067571 | -461.203712 | 0.109994 | -0.012208 | -461.105926 |
|            | REDO_s40_me_1_geo        | -501.004588 | -500.858374 | -501.088023 | -501.180896 | 0.146214 | -0.083436 | -501.118118 |
|            | $\Delta G_{MA}$ [kJ/mol] |             |             |             |             |          |           | -101.5      |
| <b>M45</b> | REDO_s25_1               | -344.559792 | -344.491526 | -344.564092 | -344.682385 | 0.068266 | -0.004300 | -344.618420 |
|            | REDO_s25_me_2            | -384.507671 | -384.405545 | -384.586318 | -384.659793 | 0.102126 | -0.078646 | -384.636313 |
|            | $\Delta G_{MA}$ [kJ/mol] |             |             |             |             |          |           | -116.4      |
| <b>M46</b> | REDO_e4_1                | -382.611097 | -382.540714 | -382.618557 | -382.748691 | 0.070383 | -0.007460 | -382.685769 |
|            | REDO_e4_me_1             | -422.550945 | -422.447162 | -422.632856 | -422.717045 | 0.103783 | -0.081911 | -422.695174 |
|            | $\Delta G_{MA}$ [kJ/mol] |             |             |             |             |          |           | -94.2       |
| <b>M47</b> | REDO_e6_3                | -383.873145 | -383.779175 | -383.879726 | -384.007423 | 0.093970 | -0.006581 | -383.920034 |
|            | REDO_e6_me_5             | -423.808625 | -423.681165 | -423.890388 | -423.971102 | 0.127460 | -0.081763 | -423.925405 |
|            | $\Delta G_{MA}$ [kJ/mol] |             |             |             |             |          |           | -83.6       |
| <b>M48</b> | REDO_e5_5                | -421.006849 | -420.912312 | -421.016937 | -421.161743 | 0.094537 | -0.010088 | -421.077294 |
|            | REDO_e5_me_1             | -460.959985 | -460.830140 | -461.039119 | -461.139742 | 0.129845 | -0.079135 | -461.089031 |
|            | $\Delta G_{MA}$ [kJ/mol] |             |             |             |             |          |           | -100.3      |
| <b>M49</b> | REDO_e7_9                | -460.329314 | -460.208734 | -460.339281 | -460.494273 | 0.120580 | -0.009966 | -460.383659 |
|            | REDO_e7_me_1             | -500.282433 | -500.126524 | -500.361094 | -500.472012 | 0.155909 | -0.078661 | -500.394764 |
|            | $\Delta G_{MA}$ [kJ/mol] |             |             |             |             |          |           | -98.6       |
| <b>M50</b> | REDO_f1_4                | -385.114737 | -384.997384 | -385.121528 | -385.245495 | 0.117353 | -0.006791 | -385.134933 |
|            | REDO_f1_me_3             | -425.046330 | -424.895343 | -425.129172 | -425.205218 | 0.150987 | -0.082842 | -425.137073 |
|            | $\Delta G_{MA}$ [kJ/mol] |             |             |             |             |          |           | -75.1       |

|            |                          |             |             |             |             |          |           |             |
|------------|--------------------------|-------------|-------------|-------------|-------------|----------|-----------|-------------|
| <b>M51</b> | REDO_f2_1                | -385.119670 | -385.001940 | -385.125603 | -385.249716 | 0.117730 | -0.005933 | -385.137919 |
|            | REDO_f2me_1              | -425.050950 | -424.900204 | -425.133080 | -425.209506 | 0.150746 | -0.082129 | -425.140889 |
|            | $\Delta G_{MA}$ [kJ/mol] |             |             |             |             |          |           | -77.3       |
| <b>M52</b> | REDO_f3_5                | -424.431136 | -424.287561 | -424.438385 | -424.572486 | 0.143575 | -0.007249 | -424.436160 |
|            | REDO_f3_me_3             | -464.363013 | -464.185753 | -464.445904 | -464.532388 | 0.177260 | -0.082891 | -464.438019 |
|            | $\Delta G_{MA}$ [kJ/mol] |             |             |             |             |          |           | -74.3       |
| <b>M53</b> | REDO_s64_10              | -503.064217 | -502.868172 | -503.072358 | -503.226701 | 0.196045 | -0.008140 | -503.038796 |
|            | REDO_s64_me_3            | -542.996417 | -542.766784 | -543.079781 | -543.186837 | 0.229633 | -0.083364 | -543.040568 |
|            | $\Delta G_{MA}$ [kJ/mol] |             |             |             |             |          |           | -74.1       |
| <b>M54</b> | REDO_g2_1                | -421.932781 | -421.836619 | -421.939734 | -422.080027 | 0.096162 | -0.006953 | -421.990818 |
|            | REDO_g2_me_2             | -461.868901 | -461.739398 | -461.946956 | -462.042630 | 0.129503 | -0.078055 | -461.991182 |
|            | $\Delta G_{MA}$ [kJ/mol] |             |             |             |             |          |           | -70.4       |
| <b>M55</b> | REDO_s62_2               | -423.194194 | -423.075700 | -423.200225 | -423.337971 | 0.118494 | -0.006031 | -423.225508 |
|            | REDO_s62_me_2            | -463.126791 | -462.973723 | -463.203977 | -463.297092 | 0.153068 | -0.077185 | -463.221209 |
|            | $\Delta G_{MA}$ [kJ/mol] |             |             |             |             |          |           | -58.2       |
| <b>M56</b> | REDO_s37_6               | -460.328261 | -460.207879 | -460.338018 | -460.492747 | 0.120382 | -0.009757 | -460.382123 |
|            | REDO_s37_me_1            | -500.278211 | -500.122503 | -500.353902 | -500.465704 | 0.155708 | -0.075690 | -500.385687 |
|            | $\Delta G_{MA}$ [kJ/mol] |             |             |             |             |          |           | -78.8       |
| <b>M57</b> | REDO_s51_5               | -499.650642 | -499.503808 | -499.659726 | -499.824702 | 0.146834 | -0.009084 | -499.686953 |
|            | REDO_s51_me_1            | -539.600643 | -539.418866 | -539.675892 | -539.797965 | 0.181777 | -0.075249 | -539.691438 |
|            | $\Delta G_{MA}$ [kJ/mol] |             |             |             |             |          |           | -81.2       |
| <b>M58</b> | REDO_g5_1                | -345.798024 | -345.707217 | -345.802809 | -345.917744 | 0.090807 | -0.004785 | -345.831722 |
|            | REDO_g5_me_2             | -385.723908 | -385.601028 | -385.802900 | -385.870870 | 0.122880 | -0.078992 | -385.826982 |
|            | $\Delta G_{MA}$ [kJ/mol] |             |             |             |             |          |           | -57.0       |
| <b>M59</b> | REDO_s61_10              | -463.753656 | -463.584181 | -463.759741 | -463.904147 | 0.169475 | -0.006085 | -463.740757 |
|            | REDO_s61_me_8            | -503.683880 | -503.480710 | -503.760830 | -503.859937 | 0.203170 | -0.076950 | -503.733717 |
|            | $\Delta G_{MA}$ [kJ/mol] |             |             |             |             |          |           | -51.0       |



|            |                          |             |             |             |             |          |           |             |
|------------|--------------------------|-------------|-------------|-------------|-------------|----------|-----------|-------------|
| <b>M60</b> | REDO_s35_1               | -383.884854 | -383.790704 | -383.890649 | -384.017526 | 0.094150 | -0.005794 | -383.929170 |
|            | REDO_s35_me_1            | -423.826011 | -423.697914 | -423.903119 | -423.988231 | 0.128097 | -0.077108 | -423.937242 |
|            | $\Delta G_{MA}$ [kJ/mol] |             |             |             |             |          |           | -90.7       |
| <b>M61</b> | REDO_g3_1                | -345.801220 | -345.710301 | -345.807848 | -345.921379 | 0.090919 | -0.006628 | -345.837089 |
|            | REDO_g3_me_1             | -385.724244 | -385.601022 | -385.805589 | -385.873751 | 0.123222 | -0.081346 | -385.831874 |
|            | $\Delta G_{MA}$ [kJ/mol] |             |             |             |             |          |           | -55.8       |
| <b>M62</b> | REDO_f8_5                | -424.434122 | -424.290559 | -424.441684 | -424.575444 | 0.143563 | -0.007562 | -424.439443 |
|            | REDO_f8_me_1             | -464.359591 | -464.183742 | -464.438973 | -464.528681 | 0.175849 | -0.079382 | -464.432214 |
|            | $\Delta G_{MA}$ [kJ/mol] |             |             |             |             |          |           | -50.5       |
| <b>M63</b> | REDO_f9_6                | -503.067191 | -502.871141 | -503.075660 | -503.229650 | 0.196050 | -0.008468 | -503.042068 |
|            | REDO_f9_me_1             | -542.993147 | -542.764966 | -543.072783 | -543.183266 | 0.228181 | -0.079636 | -543.034721 |
|            | $\Delta G_{MA}$ [kJ/mol] |             |             |             |             |          |           | -50.2       |
| <b>M64</b> | REDO_g7_2                | -385.119375 | -385.003005 | -385.125372 | -385.248982 | 0.116370 | -0.005997 | -385.138609 |
|            | REDO_g7_me_1             | -425.040635 | -424.894278 | -425.117847 | -425.197066 | 0.146357 | -0.077212 | -425.127922 |
|            | $\Delta G_{MA}$ [kJ/mol] |             |             |             |             |          |           | -41.4       |
| <b>M65</b> | REDO_e1_1                | -305.206873 | -305.165722 | -305.213310 | -305.320452 | 0.041151 | -0.006436 | -305.285737 |
|            | REDO_e1_me_1             | -345.152337 | -345.077868 | -345.241631 | -345.296744 | 0.074469 | -0.089294 | -345.311570 |
|            | $\Delta G_{MA}$ [kJ/mol] |             |             |             |             |          |           | -137.3      |
| <b>M66</b> | REDO_e2_2                | -344.528890 | -344.461676 | -344.536280 | -344.652701 | 0.067214 | -0.007390 | -344.592877 |
|            | REDO_e2_me_1             | -384.474398 | -384.374038 | -384.563758 | -384.628411 | 0.100360 | -0.089360 | -384.617411 |
|            | $\Delta G_{MA}$ [kJ/mol] |             |             |             |             |          |           | -133.9      |
| <b>M67</b> | REDO_e3_1                | -423.166769 | -423.046397 | -423.173448 | -423.309934 | 0.120372 | -0.006679 | -423.196241 |
|            | REDO_e3_me_3             | -463.113635 | -462.959444 | -463.198988 | -463.284991 | 0.154191 | -0.085353 | -463.216153 |
|            | $\Delta G_{MA}$ [kJ/mol] |             |             |             |             |          |           | -121.7      |
| <b>M68</b> | REDO_f7_1                | -344.538437 | -344.474223 | -344.547013 | -344.661982 | 0.064214 | -0.008577 | -344.606345 |
|            | REDO_f7_me_1             | -384.472952 | -384.372716 | -384.560795 | -384.626113 | 0.100236 | -0.087844 | -384.613721 |

|            |                          |             |             |             |             |          |           |             |
|------------|--------------------------|-------------|-------------|-------------|-------------|----------|-----------|-------------|
|            | $\Delta G_{MA}$ [kJ/mol] |             |             |             |             |          |           | -88.8       |
| <b>M69</b> | REDO_f4_7                | -423.171856 | -423.053801 | -423.181180 | -423.316533 | 0.118055 | -0.009325 | -423.207803 |
|            | REDO_f4_me_2_geo         | -463.106414 | -462.954081 | -463.193210 | -463.280169 | 0.152333 | -0.086796 | -463.214631 |
|            | $\Delta G_{MA}$ [kJ/mol] |             |             |             |             |          |           | -87.4       |
| <b>M70</b> | REDO_s44_3               | -462.493614 | -462.348919 | -462.503764 | -462.648212 | 0.144695 | -0.010150 | -462.513667 |
|            | REDO_s44_me_2_geo2       | -502.428423 | -502.250172 | -502.515311 | -502.611814 | 0.178251 | -0.086888 | -502.520451 |
|            | $\Delta G_{MA}$ [kJ/mol] |             |             |             |             |          |           | -87.3       |
| <b>M71</b> | REDO_f5_8                | -501.804833 | -501.633796 | -501.814833 | -501.970453 | 0.171037 | -0.010000 | -501.809416 |
|            | REDO_f5_me_8             | -541.739889 | -541.535104 | -541.827089 | -541.934658 | 0.204785 | -0.087199 | -541.817073 |
|            | $\Delta G_{MA}$ [kJ/mol] |             |             |             |             |          |           | -89.6       |
| <b>M72</b> | REDO_g1_1                | -247.303114 | -247.252383 | -247.314463 | -247.395434 | 0.050731 | -0.011349 | -247.356052 |
|            | REDO_g1_me_1             | -287.222902 | -287.137727 | -287.314249 | -287.348744 | 0.085175 | -0.091347 | -287.354916 |
|            | $\Delta G_{MA}$ [kJ/mol] |             |             |             |             |          |           | -66.5       |
| <b>M73</b> | REDO_s29_1               | -325.698761 | -325.607659 | -325.705499 | -325.798965 | 0.091102 | -0.006738 | -325.714601 |
|            | REDO_s29_me_1            | -365.620293 | -365.496916 | -365.706127 | -365.749589 | 0.123377 | -0.085834 | -365.712046 |
|            | $\Delta G_{MA}$ [kJ/mol] |             |             |             |             |          |           | -62.8       |

## Applications

### Example 1: Prediction of rate constants for the reactions of Michael acceptors with nucleophiles

The GSH-derived Mayr electrophilicity parameters  $E$  (Table S4) can be applied in equation 1 to predict second-order rate constants for the reactions of the Michael acceptors **M1–M73** with further types of nucleophiles, whose nucleophilicity parameters  $N$  and  $s_N$  have been determined.

While  $N$  and  $s_N$  for nucleophiles are solvent-dependent, the same electrophilicity parameter  $E$  for a certain Michael acceptor can be used in different solvents. Within a total reactivity range of 40 orders of magnitude, using equation 1 usually allows to calculate second-order rate constants within a precision of factor  $<100$  for reactions at 20 °C, in which exactly one new C-X or C-C  $\sigma$ -bond is formed.<sup>[S19]</sup> Significant deviations of more than a factor of 1000 may indicate the operation of a different mechanism, the influence of specific solvation on the energetics of the observed reaction or further effects that alter the energy profile of a reaction.

Table S6 compares the second-order rate constants  $k_2^{\text{eq } 1}$  ( $\text{M}^{-1} \text{s}^{-1}$ ) calculated by equation 1 for reactions at 20 °C with reported experimental second-order rate constants  $k_2^{\text{exp}}$  ( $\text{M}^{-1} \text{s}^{-1}$ ) for the reactions of Michael acceptors with diverse nitrogen-, oxygen-, or sulfur-centered nucleophiles in different solvents at the given temperature.

For example, a second-order rate constant  $k_2^{\text{exp}} = 4.3 \text{ M}^{-1} \text{ s}^{-1}$  has been experimentally determined by Heo and Bunting for the reaction of acrolein (**M1**) with the pyridone anion in aqueous solution at 25 °C (Table S6, entry 1).<sup>[S20]</sup> Using equation 1, the

electrophilicity  $E = -14.4$  of acrolein (**M1**) from Table S4, and the

nucleophile-specific reactivity parameters of the 4-pyridone anion (in H<sub>2</sub>O):

$N = 14.76$ ,  $s_N = 0.48$  (from Mayr's reactivity database<sup>[S21]</sup>) we calculate

$\lg k_2^{\text{eq } 1} = s_N(N + E) = 0.17$ , which corresponds to  $k_2^{\text{eq } 1} = 1.5 \text{ M}^{-1} \text{ s}^{-1}$  (at 20 °C).

The comparison with second-order rate constants  $k_2^{\text{eq } 1}$  (20 °C) calculated by using equation 1 and the Mayr reactivity parameters  $E$ ,  $N$ , and  $s_N$  shows that  $k_2^{\text{exp}}/k_2^{\text{eq } 1} < 100$  is fulfilled for 71 Michael additions (Table S6). In the reaction of hydrazine (in water) with the butynone **M42** (Table S6, entry 28) a lowering of the activation barrier may be due to the simultaneous C–N and C–H bond formation in the transition state of, as proposed by Um and coworkers.<sup>[S28]</sup> Only for methyl crotonate (**M61**) the ratio

$k_2^{\text{exp}}/k_2^{\text{eq } 1}$  is in the range of 130 to 600 for 5 of 6 available  $k_2^{\text{exp}}$  at 30 °C (Table S6, entries 48–53). The slight exceeding of the precision criterion of  $k_2^{\text{exp}}/k_2^{\text{eq } 1} < 100$  may in part be due to the 10 K difference in the reference temperatures for  $k_2^{\text{exp}}$  and  $k_2^{\text{eq } 1}$  but we refrain from a further interpretation of this deviation. The analysis in Table S6 proves that the GSH-derived  $E$  for Michael acceptors can, in general, be used to predict reaction rates for Michael additions of other classes of nucleophiles.

**Table S6:** Experimental ( $k_2^{\text{exp}}$ ) and calculated second-order rate constants ( $k_2^{\text{eq}1}$ ) for the 1,4-additions of various N-, O- and S-centered nucleophiles to Michael acceptors **M1**, **M2**, **M5**, **E11**, **M30**, **M33**, **M42**, **E12**, **M58**, **M61**, **M66**, **M72**, and **E15**.

| Entry | Electrophile                                                                                   | $E^{\text{[a]}}$ | Nucleophile (Solvent)                                                                                     | $N (s_N)^{\text{[b]}}$ | $k_2^{\text{exp}} (\text{M}^{-1} \text{s}^{-1})$ | $T (^\circ\text{C})$ | Reference | $k_2^{\text{eq}1} (\text{M}^{-1} \text{s}^{-1})$ | $k_2^{\text{exp}}/k_2^{\text{eq}1}$ |
|-------|------------------------------------------------------------------------------------------------|------------------|-----------------------------------------------------------------------------------------------------------|------------------------|--------------------------------------------------|----------------------|-----------|--------------------------------------------------|-------------------------------------|
| 1     | 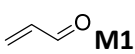 <b>M1</b>    | -14.4            |  (in H <sub>2</sub> O)   | 14.76 (0.48)           | <b>4.3</b>                                       | 25                   | [S20]     | <b>1.49</b>                                      | 2.9                                 |
| 2     | <b>M1</b>                                                                                      | -14.4            |  (in H <sub>2</sub> O)   | 13.19 (0.56)           | <b>2.39</b>                                      | 25                   | [S20]     | <b>0.21</b>                                      | 11                                  |
| 3     | <b>M1</b>                                                                                      | -14.4            |  (in H <sub>2</sub> O)   | 12.19 (0.66)           | <b>1.65</b>                                      | 25                   | [S20]     | <b>3.48 × 10<sup>-2</sup></b>                    | 47                                  |
| 4     | <b>M1</b>                                                                                      | -14.4            | morpholine (in MeOH)                                                                                      | 15.40 (0.64)           | <b>1.28</b>                                      | 30                   | [S22]     | <b>4.37</b>                                      | 0.29                                |
| 5     |  <b>M2</b>    | -17.2            |  (in H <sub>2</sub> O)   | 13.19 (0.56)           | <b>1.8 × 10<sup>-2</sup></b>                     | 25                   | [S20]     | <b>5.68 × 10<sup>-3</sup></b>                    | 3.2                                 |
| 6     |  <b>M5</b>   | -18.4            |  (in H <sub>2</sub> O)  | 13.19 (0.56)           | <b>8 × 10<sup>-3</sup></b>                       | 25                   | [S20]     | <b>1.21 × 10<sup>-3</sup></b>                    | 6.6                                 |
| 7     | <b>M5</b>                                                                                      | -18.4            | <sup>-</sup> O <sub>2</sub> C-CH <sub>2</sub> -S <sup>-</sup> (in H <sub>2</sub> O)                       | 22.62 (0.43)           | <b>15</b>                                        | 25                   | [S23]     | <b>65.3</b>                                      | 0.23                                |
| 8     |  <b>E11</b> | -16.8            |  (in H <sub>2</sub> O) | 14.76 (0.48)           | <b>0.96</b>                                      | 25                   | [S20]     | <b>0.105</b>                                     | 9.2                                 |
| 9     | <b>E11</b>                                                                                     | -16.8            |  (in H <sub>2</sub> O) | 13.19 (0.56)           | <b>0.55</b>                                      | 25                   | [S20]     | <b>9.51 × 10<sup>-3</sup></b>                    | 58                                  |

|    |                                                                                     |       |                                                                                                         |              |                                  |    |       |                               |                       |
|----|-------------------------------------------------------------------------------------|-------|---------------------------------------------------------------------------------------------------------|--------------|----------------------------------|----|-------|-------------------------------|-----------------------|
| 10 | <b>E11</b>                                                                          | -16.8 |  (in H <sub>2</sub> O) | 12.19 (0.66) | <b>0.42</b>                      | 25 | [S20] | <b>9.07 × 10<sup>-4</sup></b> | 4.6 × 10 <sup>2</sup> |
| 11 | <b>E11</b>                                                                          | -16.8 | morpholine (in MeOH)                                                                                    | 15.40 (0.64) | <b>1.20</b>                      | 30 | [S22] | <b>0.127</b>                  | 9.4                   |
| 12 | <b>E11</b>                                                                          | -16.8 | Gly <sup>-</sup> (in H <sub>2</sub> O)                                                                  | 13.51 (0.58) | <b>0.400</b>                     | 30 | [S24] | <b>1.24 × 10<sup>-2</sup></b> | 32                    |
| 13 | <b>E11</b>                                                                          | -16.8 | Ala <sup>-</sup> (in H <sub>2</sub> O)                                                                  | 13.01 (0.58) | <b>0.228</b>                     | 30 | [S24] | <b>6.34 × 10<sup>-3</sup></b> | 36                    |
| 14 | <b>E11</b>                                                                          | -16.8 | MeO <sup>-</sup> (in MeOH)                                                                              | 15.78 (0.56) | <b>0.378</b>                     | 19 | [S25] | <b>0.268</b>                  | 1.4                   |
| 15 | <b>E11</b>                                                                          | -16.8 | EtO <sup>-</sup> (in EtOH)                                                                              | 15.78 (0.65) | <b>1.56</b>                      | 19 | [S25] | <b>0.217</b>                  | 7.2                   |
| 16 | <b>E11</b>                                                                          | -16.8 | iPrO <sup>-</sup> (in iPrOH)                                                                            | 17.03 (0.63) | <b>3.15</b>                      | 19 | [S25] | <b>1.40</b>                   | 2.3                   |
|    |                                                                                     |       |                                                                                                         |              |                                  |    |       |                               |                       |
| 17 |    | -15.8 | MeO <sup>-</sup> (in MeOH)                                                                              | 15.78 (0.56) | <b>0.235</b>                     | 24 | [S26] | <b>0.975</b>                  | 0.24                  |
|    |                                                                                     |       |                                                                                                         |              |                                  |    |       |                               |                       |
| 18 |    | -18.6 | MeO <sup>-</sup> (in MeOH)                                                                              | 15.78 (0.56) | <b>8.0 × 10<sup>-3</sup> [c]</b> | 24 | [S26] | <b>2.64 × 10<sup>-2</sup></b> | 0.30                  |
| 19 | <b>M33</b>                                                                          | -18.6 | iPrO <sup>-</sup> (in iPrOH)                                                                            | 17.03 (0.63) | <b>2.6 × 10<sup>-2</sup> [c]</b> | 24 | [S26] | <b>0.103</b>                  | 0.25                  |
|    |                                                                                     |       |                                                                                                         |              |                                  |    |       |                               |                       |
| 20 |  | -16.6 | aniline (in H <sub>2</sub> O)                                                                           | 12.99 (0.73) | <b>0.375</b>                     | 25 | [S27] | <b>2.32 × 10<sup>-3</sup></b> | 1.6 × 10 <sup>2</sup> |
| 21 | <b>M42</b>                                                                          | -16.6 | <i>p</i> -anisidine (in H <sub>2</sub> O)                                                               | 14.28 (0.68) | <b>1.34</b>                      | 25 | [S27] | <b>2.64 × 10<sup>-2</sup></b> | 51                    |
| 22 | <b>M42</b>                                                                          | -16.6 | EtGly <sup>-</sup> (in H <sub>2</sub> O)                                                                | 12.08 (0.60) | <b>0.147</b>                     | 25 | [S28] | <b>1.94 × 10<sup>-3</sup></b> | 76                    |
| 23 | <b>M42</b>                                                                          | -16.6 | ethanolamine (in H <sub>2</sub> O)                                                                      | 12.61 (0.58) | <b>0.336</b>                     | 25 | [S28] | <b>4.85 × 10<sup>-3</sup></b> | 69                    |
| 24 | <b>M42</b>                                                                          | -16.6 | GlyGly <sup>-</sup> (in H <sub>2</sub> O)                                                               | 12.91 (0.59) | <b>0.160</b>                     | 25 | [S28] | <b>6.65 × 10<sup>-3</sup></b> | 24                    |

|    |                                                                                                |       |                                                                                                         |              |                               |    |       |                               |                           |
|----|------------------------------------------------------------------------------------------------|-------|---------------------------------------------------------------------------------------------------------|--------------|-------------------------------|----|-------|-------------------------------|---------------------------|
| 25 | <b>M42</b>                                                                                     | -16.6 | Gly <sup>-</sup> (in H <sub>2</sub> O)                                                                  | 13.51 (0.58) | <b>0.594</b>                  | 25 | [S28] | <b>1.61 × 10<sup>-2</sup></b> | 37                        |
| 26 | <b>M42</b>                                                                                     | -16.6 | ethylamine (in H <sub>2</sub> O)                                                                        | 12.87 (0.58) | <b>0.670</b>                  | 25 | [S28] | <b>6.86 × 10<sup>-3</sup></b> | 98                        |
| 27 | <b>M42</b>                                                                                     | -16.6 | benzylamine (in H <sub>2</sub> O)                                                                       | 13.44 (0.55) | <b>0.454</b>                  | 25 | [S28] | <b>1.83 × 10<sup>-2</sup></b> | 25                        |
| 28 | <b>M42</b>                                                                                     | -16.6 | hydrazine (in H <sub>2</sub> O)                                                                         | 13.46 (0.57) | <b>3.66</b>                   | 25 | [S28] | <b>1.62 × 10<sup>-2</sup></b> | 2.3 × 10 <sup>2</sup> [d] |
| 29 | <b>M42</b>                                                                                     | -16.6 | piperidine (in H <sub>2</sub> O)                                                                        | 18.13 (0.44) | <b>4.12</b>                   | 25 | [S29] | <b>4.71</b>                   | 0.87                      |
| 30 | <b>M42</b>                                                                                     | -16.6 | morpholine (in H <sub>2</sub> O)                                                                        | 15.62 (0.54) | <b>10.9</b>                   | 25 | [S29] | <b>0.296</b>                  | 37                        |
| 31 | <b>M42</b>                                                                                     | -16.6 | piperazine (in H <sub>2</sub> O)                                                                        | 17.22 (0.50) | <b>13.3</b>                   | 25 | [S29] | <b>2.04</b>                   | 6.5                       |
| 32 | <b>M42</b>                                                                                     | -16.6 | piperidine (in MeCN)                                                                                    | 17.35 (0.68) | <b>5.62</b>                   | 25 | [S29] | <b>3.24</b>                   | 1.7                       |
| 33 | <b>M42</b>                                                                                     | -16.6 | morpholine (in MeCN)                                                                                    | 15.65 (0.74) | <b>0.520</b>                  | 25 | [S29] | <b>0.198</b>                  | 2.6                       |
|    |                                                                                                |       |                                                                                                         |              |                               |    |       |                               |                           |
| 34 | 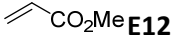 <b>E12</b>   | -18.8 |  (in H <sub>2</sub> O) | 12.19 (0.66) | <b>1.46 × 10<sup>-2</sup></b> | 25 | [S20] | <b>7.22 × 10<sup>-4</sup></b> | 20                        |
| 35 | <b>E12</b>                                                                                     | -18.8 | morpholine (in MeOH)                                                                                    | 15.40 (0.64) | <b>1.04 × 10<sup>-2</sup></b> | 30 | [S22] | <b>6.67 × 10<sup>-3</sup></b> | 1.6                       |
| 36 | <b>E12</b>                                                                                     | -18.8 | GlyGly <sup>-</sup> (in H <sub>2</sub> O)                                                               | 12.91 (0.59) | <b>4.6 × 10<sup>-3</sup></b>  | 30 | [S24] | <b>3.35 × 10<sup>-4</sup></b> | 14                        |
| 37 | <b>E12</b>                                                                                     | -18.8 | Gly <sup>-</sup> (in H <sub>2</sub> O)                                                                  | 13.51 (0.58) | <b>1.82 × 10<sup>-2</sup></b> | 30 | [S24] | <b>8.55 × 10<sup>-4</sup></b> | 21                        |
| 38 | <b>E12</b>                                                                                     | -18.8 | β-Ala <sup>-</sup> (in H <sub>2</sub> O)                                                                | 13.26 (0.58) | <b>2.84 × 10<sup>-2</sup></b> | 30 | [S24] | <b>6.12 × 10<sup>-4</sup></b> | 46                        |
| 39 | <b>E12</b>                                                                                     | -18.8 | Phe <sup>-</sup> (in H <sub>2</sub> O)                                                                  | 14.12 (0.53) | <b>6.40 × 10<sup>-3</sup></b> | 30 | [S24] | <b>3.31 × 10<sup>-3</sup></b> | 1.9                       |
| 40 | <b>E12</b>                                                                                     | -18.8 | Met <sup>-</sup> (in H <sub>2</sub> O)                                                                  | 13.16 (0.58) | <b>6.90 × 10<sup>-3</sup></b> | 30 | [S24] | <b>5.36 × 10<sup>-4</sup></b> | 13                        |
| 41 | <b>E12</b>                                                                                     | -18.8 | Ala <sup>-</sup> (in H <sub>2</sub> O)                                                                  | 13.01 (0.58) | <b>1.11 × 10<sup>-2</sup></b> | 30 | [S24] | <b>4.38 × 10<sup>-4</sup></b> | 25                        |
|    |                                                                                                |       |                                                                                                         |              |                               |    |       |                               |                           |
| 42 |  <b>M58</b> | -23.4 | GlyGly <sup>-</sup> (in H <sub>2</sub> O)                                                               | 12.91 (0.59) | <b>1.35 × 10<sup>-5</sup></b> | 30 | [S24] | <b>6.47 × 10<sup>-7</sup></b> | 21                        |

|    |                                                                                                |       |                                                                                                           |              |                       |    |       |                       |                   |
|----|------------------------------------------------------------------------------------------------|-------|-----------------------------------------------------------------------------------------------------------|--------------|-----------------------|----|-------|-----------------------|-------------------|
| 43 | <b>M58</b>                                                                                     | -23.4 | Gly <sup>-</sup> (in H <sub>2</sub> O)                                                                    | 13.51 (0.58) | $5.80 \times 10^{-5}$ | 30 | [S24] | $1.84 \times 10^{-6}$ | 32                |
| 44 | <b>M58</b>                                                                                     | -23.4 | β-Ala <sup>-</sup> (in H <sub>2</sub> O)                                                                  | 13.26 (0.58) | $1.37 \times 10^{-4}$ | 30 | [S24] | $1.31 \times 10^{-6}$ | $1.0 \times 10^2$ |
| 45 | <b>M58</b>                                                                                     | -23.4 | Phe <sup>-</sup> (in H <sub>2</sub> O)                                                                    | 14.12 (0.53) | $2.48 \times 10^{-5}$ | 30 | [S24] | $1.21 \times 10^{-5}$ | 2.1               |
| 46 | <b>M58</b>                                                                                     | -23.4 | Met <sup>-</sup> (in H <sub>2</sub> O)                                                                    | 13.16 (0.58) | $2.93 \times 10^{-5}$ | 30 | [S24] | $1.15 \times 10^{-6}$ | 26                |
| 47 | <b>M58</b>                                                                                     | -23.4 | Ala <sup>-</sup> (in H <sub>2</sub> O)                                                                    | 13.01 (0.58) | $3.64 \times 10^{-5}$ | 30 | [S24] | $9.41 \times 10^{-7}$ | 39                |
|    |                                                                                                |       |                                                                                                           |              |                       |    |       |                       |                   |
| 48 | 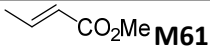 <b>M61</b>   | -22.8 | GlyGly <sup>-</sup> (in H <sub>2</sub> O)                                                                 | 12.91 (0.59) | $2.20 \times 10^{-4}$ | 30 | [S24] | $1.46 \times 10^{-6}$ | $1.5 \times 10^2$ |
| 49 | <b>M61</b>                                                                                     | -22.8 | Gly <sup>-</sup> (in H <sub>2</sub> O)                                                                    | 13.51 (0.58) | $1.20 \times 10^{-3}$ | 30 | [S24] | $4.09 \times 10^{-6}$ | $2.9 \times 10^2$ |
| 50 | <b>M61</b>                                                                                     | -22.8 | β-Ala <sup>-</sup> (in H <sub>2</sub> O)                                                                  | 13.26 (0.58) | $1.76 \times 10^{-3}$ | 30 | [S24] | $2.93 \times 10^{-6}$ | $6.0 \times 10^2$ |
| 51 | <b>M61</b>                                                                                     | -22.8 | Phe <sup>-</sup> (in H <sub>2</sub> O)                                                                    | 14.12 (0.53) | $3.31 \times 10^{-4}$ | 30 | [S24] | $2.51 \times 10^{-5}$ | 13                |
| 52 | <b>M61</b>                                                                                     | -22.8 | Met <sup>-</sup> (in H <sub>2</sub> O)                                                                    | 13.16 (0.58) | $3.36 \times 10^{-4}$ | 30 | [S24] | $2.56 \times 10^{-6}$ | $1.3 \times 10^2$ |
| 53 | <b>M61</b>                                                                                     | -22.8 | Ala <sup>-</sup> (in H <sub>2</sub> O)                                                                    | 13.01 (0.58) | $5.85 \times 10^{-4}$ | 30 | [S24] | $2.10 \times 10^{-6}$ | $2.8 \times 10^2$ |
|    |                                                                                                |       |                                                                                                           |              |                       |    |       |                       |                   |
| 54 |  <b>M66</b>   | -17.7 | piperidine (in H <sub>2</sub> O)                                                                          | 18.13 (0.44) | <b>1.24</b>           | 25 | [S30] | <b>1.55</b>           | 0.80              |
| 55 | <b>M66</b>                                                                                     | -17.7 | morpholine (in H <sub>2</sub> O)                                                                          | 15.62 (0.54) | <b>0.245</b>          | 25 | [S30] | $7.53 \times 10^{-2}$ | 3.3               |
| 56 | <b>M66</b>                                                                                     | -17.7 | piperazine (in H <sub>2</sub> O)                                                                          | 17.22 (0.50) | <b>0.935</b>          | 25 | [S30] | <b>0.575</b>          | 1.6               |
| 57 | <b>M66</b>                                                                                     | -17.7 | piperidine (in MeCN)                                                                                      | 17.35 (0.68) | <b>0.902</b>          | 25 | [S30] | <b>0.578</b>          | 1.6               |
| 58 | <b>M66</b>                                                                                     | -17.7 | morpholine (in MeCN)                                                                                      | 15.65 (0.74) | $7.48 \times 10^{-2}$ | 25 | [S30] | $3.04 \times 10^{-2}$ | 2.5               |
|    |                                                                                                |       |                                                                                                           |              |                       |    |       |                       |                   |
| 59 |  <b>M72</b> | -21.8 |  (in H <sub>2</sub> O) | 13.19 (0.56) | $6.1 \times 10^{-4}$  | 25 | [S20] | $1.51 \times 10^{-5}$ | 41                |



|    |                                                                                              |       |                                                                                                         |              |                       |    |       |                       |                   |
|----|----------------------------------------------------------------------------------------------|-------|---------------------------------------------------------------------------------------------------------|--------------|-----------------------|----|-------|-----------------------|-------------------|
| 60 | <b>M72</b>                                                                                   | -21.8 | 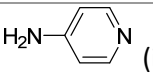 (in H <sub>2</sub> O) | 12.19 (0.66) | $5.3 \times 10^{-4}$  | 25 | [S20] | $4.54 \times 10^{-7}$ | $1.2 \times 10^3$ |
| 61 | <b>M72</b>                                                                                   | -21.8 | morpholine (in MeOH)                                                                                    | 15.40 (0.64) | $3.57 \times 10^{-4}$ | 30 | [S22] | $8.02 \times 10^{-5}$ | 0.65              |
| 62 | <b>M72</b>                                                                                   | -21.8 | pyrrolidine (in MeOH)                                                                                   | 15.97 (0.63) | $8.27 \times 10^{-3}$ | 30 | [S22] | $2.12 \times 10^{-4}$ | 1.6               |
| 63 | <b>M72</b>                                                                                   | -21.8 | GlyGly <sup>-</sup> (in H <sub>2</sub> O)                                                               | 12.91 (0.59) | $2.0 \times 10^{-4}$  | 30 | [S24] | $5.69 \times 10^{-6}$ | 35                |
| 64 | <b>M72</b>                                                                                   | -21.8 | Gly <sup>-</sup> (in H <sub>2</sub> O)                                                                  | 13.51 (0.58) | $6.3 \times 10^{-4}$  | 30 | [S24] | $1.56 \times 10^{-5}$ | 41                |
| 65 | <b>M72</b>                                                                                   | -21.8 | Phe <sup>-</sup> (in H <sub>2</sub> O)                                                                  | 14.12 (0.53) | $2.2 \times 10^{-4}$  | 30 | [S24] | $8.50 \times 10^{-5}$ | 2.6               |
| 66 | <b>M72</b>                                                                                   | -21.8 | Ala <sup>-</sup> (in H <sub>2</sub> O)                                                                  | 13.01 (0.58) | $3.5 \times 10^{-4}$  | 30 | [S24] | $7.98 \times 10^{-6}$ | 44                |
| 67 | <b>M72</b>                                                                                   | -21.8 | iPrO <sup>-</sup> (in iPrOH)                                                                            | 17.03 (0.63) | $3.2 \times 10^{-4}$  | 24 | [S26] | $9.88 \times 10^{-4}$ | 0.30              |
|    |                                                                                              |       |                                                                                                         |              |                       |    |       |                       |                   |
| 68 |  <b>E15</b> | -19.1 |  (in H <sub>2</sub> O) | 13.19 (0.56) | $4.03 \times 10^{-3}$ | 25 | [S20] | $4.90 \times 10^{-4}$ | 8.2               |
| 69 | <b>E15</b>                                                                                   | -19.1 | morpholine (in MeOH)                                                                                    | 15.40 (0.64) | $5.68 \times 10^{-3}$ | 30 | [S22] | $4.29 \times 10^{-3}$ | 1.3               |
| 70 | <b>E15</b>                                                                                   | -19.1 | GlyGly <sup>-</sup> (in H <sub>2</sub> O)                                                               | 12.91 (0.59) | $1.37 \times 10^{-3}$ | 30 | [S24] | $2.23 \times 10^{-4}$ | 6.2               |
| 71 | <b>E15</b>                                                                                   | -19.1 | Gly <sup>-</sup> (in H <sub>2</sub> O)                                                                  | 13.51 (0.58) | $5.00 \times 10^{-3}$ | 30 | [S24] | $5.73 \times 10^{-4}$ | 8.7               |
| 72 | <b>E15</b>                                                                                   | -19.1 | β-Ala <sup>-</sup> (in H <sub>2</sub> O)                                                                | 13.26 (0.58) | $8.92 \times 10^{-3}$ | 30 | [S24] | $4.10 \times 10^{-4}$ | 22                |
| 73 | <b>E15</b>                                                                                   | -19.1 | Phe <sup>-</sup> (in H <sub>2</sub> O)                                                                  | 14.12 (0.53) | $1.76 \times 10^{-3}$ | 30 | [S24] | $2.29 \times 10^{-3}$ | 0.77              |
| 74 | <b>E15</b>                                                                                   | -19.1 | Met <sup>-</sup> (in H <sub>2</sub> O)                                                                  | 13.16 (0.58) | $1.76 \times 10^{-3}$ | 30 | [S24] | $3.59 \times 10^{-4}$ | 4.9               |
| 75 | <b>E15</b>                                                                                   | -19.1 | Ala <sup>-</sup> (in H <sub>2</sub> O)                                                                  | 13.01 (0.58) | $3.53 \times 10^{-3}$ | 30 | [S24] | $2.94 \times 10^{-4}$ | 12                |
| 76 | <b>E15</b>                                                                                   | -19.1 | MeO <sup>-</sup> (in MeOH)                                                                              | 15.78 (0.56) | $5.80 \times 10^{-3}$ | 20 | [S31] | $1.38 \times 10^{-2}$ | 0.42              |
| 77 | <b>E15</b>                                                                                   | -19.1 | MeO <sup>-</sup> (in MeOH)                                                                              | 15.78 (0.56) | $1.22 \times 10^{-2}$ | 24 | [S26] | $1.38 \times 10^{-2}$ | 0.88              |
| 78 | <b>E15</b>                                                                                   | -19.1 | EtO <sup>-</sup> (in EtOH)                                                                              | 15.78 (0.65) | $5.25 \times 10^{-2}$ | 20 | [S31] | $6.95 \times 10^{-3}$ | 7.6               |

|    |            |       |                              |              |                       |    |       |                       |     |
|----|------------|-------|------------------------------|--------------|-----------------------|----|-------|-----------------------|-----|
| 79 | <b>E15</b> | -19.1 | nPrO <sup>-</sup> (in nPrOH) | 16.03 (0.70) | $9.58 \times 10^{-2}$ | 20 | [S31] | $7.10 \times 10^{-3}$ | 14  |
| 80 | <b>E15</b> | -19.1 | iPrO <sup>-</sup> (in iPrOH) | 17.03 (0.63) | <b>0.287</b>          | 20 | [S31] | $4.96 \times 10^{-2}$ | 5.8 |

[a] From Table S4. [b] From ref<sup>[S21]</sup>. [c] Second-order rate constants during the initial phase of the reactions. [d] Concerted C–N and C–H bond formation in the transition state was proposed in ref<sup>[S28]</sup>.

## Example 2: Estimating the electrophilicity of fluorescent thiol probes

Rate constants with GSH are an often used measure for the reactivity of fluorescent electrophilic thiol probes. Electrophilicity parameters  $E$  for these fluorescence probes can be derived from the available rate constants  $k_{\text{GSH}}$ . Once the electrophilicity parameter  $E$  of a fluorescent thiol probe is known, rate constants of their reactions with further competing nucleophilic sites in peptides can be estimated by using equation 1.

For example, Jiang et al. introduced the GSH probe 'RealThiol' for quantitative real-time imaging of glutathione in living cells. For the reaction of RealThiol with GSH the authors measured a second-order rate constant  $k_{\text{GSH}} = 7.5 \text{ M}^{-1} \text{ s}^{-1}$  (pH 7.4, 37 °C).<sup>[S32]</sup> Applying  $k_{\text{GSH}}$  in equation 2 (with  $F = 0.0280$ ) gives a second-order rate constant  $k_2 = 2.7 \times 10^2 \text{ M}^{-1} \text{ s}^{-1}$ . With equation 1 and the nucleophilicity parameter of  $\text{GSH}(\text{NH}_3^+/\text{S}^-)$ , that is  $N = 20.97$  ( $s_N = 0.56$ ), an approximate electrophilicity of  $E = -16.6$  can be calculated for RealThiol (Table S7, entry 1). Further examples for estimated electrophilicity parameters  $E$  for fluorescent thiol probes are collected in Table S7.

Though in lack of the nucleophilicity parameters for GSH, Kamiya and Urano used Mayr electrophilicity parameters  $E$  for a rational design strategy to develop highly reactive fluorescence probes.<sup>[S33]</sup> ThiolQuant Green (TQ Green)<sup>[S34]</sup> was reported to undergo relatively slow reactions with GSH (see Table S7, entry 2). Kamiya, Urano and coworkers then estimated the electrophilicity  $E$  of TQ Green based on a comparison with the structurally analogous chalcone fragment whose  $E$  is available in Mayr's database ( $E = -19$ ).<sup>[S21]</sup> They concluded, that in order to achieve the required higher reactivity of the GSH probe for real-time dynamic quantification of GSH in living cells, a carbocationic fragment in the GSH probe would be more suitable. The nucleophilicity of GSH ( $N = 20.97$ ,  $s_N = 0.56$ ), determined in this work, can now be used to estimate the electrophilicities  $E$  of the fluorescent probes developed by Urano and Kamiya (Table S7, entries 7–9), which may help to further improve the performance of these fluorescent probes in real-time dynamic GSH monitoring in living cells.

**Table S7:** Rate constants  $k_{\text{GSH}}^{\text{exp}}$  (at pH 7.4) for reactions of fluorescence probes **M74–M82** with GSH, estimated electrophilicities  $E$  of the probes, and their quantum-chemically calculated methyl anion affinities  $\Delta G_{\text{MA}}$ .

| Entry | Probe                                                                                                       | $k_{\text{GSH}}^{\text{exp}}$ ( $\text{M}^{-1} \text{s}^{-1}$ ) | $T$   | Reference | $k_2(\text{GS}^-)$ ( $\text{M}^{-1} \text{s}^{-1}$ ) | Estimated $E^{[a]}$ | $\Delta G_{\text{MA}}^{[b]}$ ( $\text{kJ mol}^{-1}$ ) |
|-------|-------------------------------------------------------------------------------------------------------------|-----------------------------------------------------------------|-------|-----------|------------------------------------------------------|---------------------|-------------------------------------------------------|
| 1     | 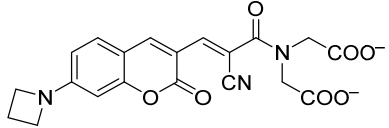<br><b>M74 (RealThiol)</b> | 7.5                                                             | 37 °C | [S32]     | $2.7 \times 10^2$                                    | -16.6               | -108.4                                                |
| 2     | <br><b>M75 (TQ Green)</b>  | 0.15                                                            | - [c] | [S34]     | 5.4                                                  | -19.7               | -70.9                                                 |
| 3     | <br><b>M76</b>             | 1.29                                                            | - [c] | [S35]     | 46.1                                                 | -18.0               | -85.2                                                 |
| 4     | <br><b>M77</b>           | --                                                              | 30 °C | [S36]     | $1.56^{[d]}$                                         | -20.6               | -83.9                                                 |
| 5     | <br><b>M78</b>           | --                                                              | 30 °C | [S36]     | $44.4^{[d]}$                                         | -18.0               | -79.3                                                 |

|   |                                                                                                                 |     |                  |       |                     |       |        |
|---|-----------------------------------------------------------------------------------------------------------------|-----|------------------|-------|---------------------|-------|--------|
| 6 | 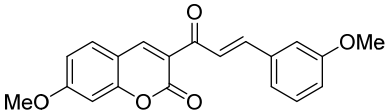<br><b>M79</b>                 | --  | 30 °C            | [S36] | 19.9 <sup>[d]</sup> | -18.6 | -81.1  |
| 7 | <br><b>M80 (Ph SiR650)</b>     | 560 | - <sup>[c]</sup> | [S33] | $2.00 \times 10^4$  | -13.2 | -148.4 |
| 8 | <br><b>M81 (2' Me SiR600)</b>  | 272 | - <sup>[c]</sup> | [S33] | $9.71 \times 10^3$  | -13.8 | -151.2 |
| 9 | <br><b>M82 (2' Me-SiR610)</b> | 153 | - <sup>[c]</sup> | [S33] | $5.46 \times 10^3$  | -14.2 | -144.4 |

<sup>[a]</sup> Calculated by using equation 1 (main text),  $\lg k_2(\text{GS}^-)$ , and the reactivity parameters for  $\text{GS}^-$  ( $N = 20.97$ ,  $s_N = 0.555$ ). <sup>[b]</sup> For details of the quantum-chemical calculation of methyl anion affinities  $\Delta G_{\text{MA}}$  see Table S8. <sup>[c]</sup> Temperature not reported. <sup>[d]</sup> As reported in ref. <sup>[S36]</sup>

### Quantum-chemically calculated methyl anion affinities ( $\Delta G_{\text{MA}}$ ) of fluorescent thiol probes

The methyl anion affinities  $\Delta G_{\text{MA}}$  for **M74–M82** listed in column 8 of Table S7 were calculated by following the same procedure as described on page S32. Figure S3 shows the linear correlation of electrophilicities  $E$  with  $\Delta G_{\text{MA}}$  for 117 Michael acceptors (black dots: from ref<sup>[S10c]</sup>, orange dots: this work). Purple rhombs ( $\blacklozenge$ ) show the additional  $E$  vs  $\Delta G_{\text{MA}}$  data for the 9 fluorescence probes **M74–M82** from Table S7.

Figure S3 demonstrates that the correlation between quantum chemically calculated methyl anion affinities  $\Delta G_{\text{MA}}$  and the electrophilicities  $E$  of prototypical Michael acceptors is also applicable for roughly estimating the reactivity of the structurally more sophisticated fluorescence probes **M74–M82**.

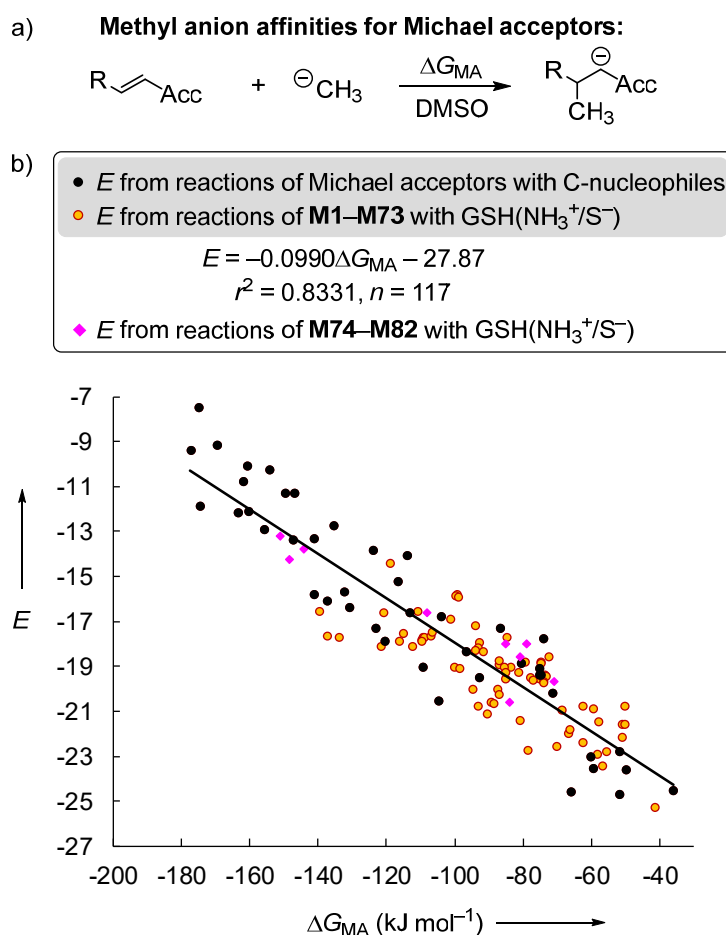

**Figure S3.** Correlation of experimentally determined Michael acceptor electrophilicities  $E$  and methyl anion affinities  $\Delta G_{\text{MA}}$  in DMSO [calculated at the SMD(DMSO)/B3LYP/6-311++G(3df,2pd)//B3LYP/6-31G(d,p) level of theory, ref<sup>[S10c]</sup> and this work] supplemented by data for the fluorescent thiol probes **M74–M82** (purple rhombs  $\blacklozenge$ , with data from Table S7, not included when calculating the correlation line; details of the quantum-chemical calculations for **M74–M82** are given in Table S8).

**Table S8:** Quantum-mechanically calculated methyl anion affinities  $\Delta G_{MA}$  for Michael acceptors **M74–M82** [in  $\text{kJ mol}^{-1}$ , calculated at the SMD(DMSO)/B3LYP/6-311++G(3df,2pd)//B3LYP/6-31G(d,p) level of theory]

| Michael acceptor | Filename                 | $E_{\text{tot}}$ (B3LYP/6-31G(d,p)) | $G_{298}$    | $E_{\text{tot, solv.}}$ (SMD(DMSO)/B3LYP/6-31G(d,p)// B3LYP/6-31G(d,p)) | $E_{\text{tot, high.}}$ (B3LYP/6-311++G(3df,2pd)// B3LYP/6-31G(d,p)) | $\Delta G$ | $\Delta G_{\text{solv}}$ | $G_{298}$ (SMD(DMSO)/B3LYP/6-311++G(3df,2pd)// B3LYP/6-31G(d,p)) |
|------------------|--------------------------|-------------------------------------|--------------|-------------------------------------------------------------------------|----------------------------------------------------------------------|------------|--------------------------|------------------------------------------------------------------|
|                  | Methyl anion             | -39.796028                          | -39.787379   | -39.921582                                                              | -39.856638                                                           | 0.008649   | -0.125554                | -39.973543                                                       |
| <b>M74</b>       | REDO_rt_sm_4             | -1461.991496                        | -1461.726753 | -1462.242350                                                            | -1462.528398                                                         | 0.264743   | -0.250854                | -1462.514509                                                     |
|                  | REDO_rt_me_e_10          | -1501.767394                        | -1501.464592 | -1502.265339                                                            | -1502.334190                                                         | 0.302802   | -0.497945                | -1502.529333                                                     |
|                  | $\Delta G_{MA}$ [kJ/mol] |                                     |              |                                                                         |                                                                      |            |                          | -108.4                                                           |
| <b>M75</b>       | REDO_tq_green_3          | -3890.559432                        | -3890.249532 | -3890.661877                                                            | -3893.442293                                                         | 0.309900   | -0.102446                | -3893.234839                                                     |
|                  | REDO_tq_green_me_z_6     | -3930.424837                        | -3930.081397 | -3930.666410                                                            | -3933.337252                                                         | 0.343440   | -0.241572                | -3933.235385                                                     |
|                  | $\Delta G_{MA}$ [kJ/mol] |                                     |              |                                                                         |                                                                      |            |                          | -70.9                                                            |
| <b>M76</b>       | REDO_tq_oh_4             | -1394.693066                        | -1394.368129 | -1394.798509                                                            | -1395.165252                                                         | 0.324937   | -0.105443                | -1394.945758                                                     |
|                  | REDO_tq_oh_me_z_1        | -1434.562243                        | -1434.201384 | -1434.808150                                                            | -1435.066722                                                         | 0.360859   | -0.245907                | -1434.951770                                                     |
|                  | $\Delta G_{MA}$ [kJ/mol] |                                     |              |                                                                         |                                                                      |            |                          | -85.2                                                            |
| <b>M77</b>       | REDO_og1_1               | -1033.361672                        | -1033.127333 | -1033.383033                                                            | -1033.690881                                                         | 0.234339   | -0.021361                | -1033.477902                                                     |
|                  | REDO_og1_me_6            | -1073.309088                        | -1073.041347 | -1073.392650                                                            | -1073.667583                                                         | 0.267741   | -0.083562                | -1073.483404                                                     |
|                  | $\Delta G_{MA}$ [kJ/mol] |                                     |              |                                                                         |                                                                      |            |                          | -83.9                                                            |
| <b>M78</b>       | REDO_og5_2               | -1147.885858                        | -1147.622673 | -1147.908687                                                            | -1148.255234                                                         | 0.263185   | -0.022829                | -1148.014878                                                     |
|                  | REDO_og5_me_6            | -1187.830709                        | -1187.532938 | -1187.917590                                                            | -1188.229515                                                         | 0.297771   | -0.086881                | -1188.018625                                                     |
|                  | $\Delta G_{MA}$ [kJ/mol] |                                     |              |                                                                         |                                                                      |            |                          | -79.3                                                            |
| <b>M79</b>       | REDO_og3_1               | -1147.887399                        | -1147.623893 | -1147.909568                                                            | -1148.257465                                                         | 0.263506   | -0.022169                | -1148.016127                                                     |
|                  | REDO_og3_me_4            | -1187.836132                        | -1187.539153 | -1187.918804                                                            | -1188.234850                                                         | 0.296979   | -0.082673                | -1188.020543                                                     |
|                  | $\Delta G_{MA}$ [kJ/mol] |                                     |              |                                                                         |                                                                      |            |                          | -81.1                                                            |

|            |                       |              |              |              |              |          |           |              |
|------------|-----------------------|--------------|--------------|--------------|--------------|----------|-----------|--------------|
| <b>M80</b> | REDO_sir650_1         | -1369.005284 | -1368.586678 | -1369.069411 | -1369.337823 | 0.418606 | -0.064127 | -1368.983344 |
|            | REDO_sir650_me_2      | -1409.102782 | -1408.645544 | -1409.118965 | -1409.454462 | 0.457238 | -0.016183 | -1409.013407 |
|            | $\Delta$ GMA [kJ/mol] |              |              |              |              |          |           | -148.4       |
| <b>M81</b> | REDO_sir600_1         | -1251.087586 | -1250.746939 | -1251.160216 | -1251.392682 | 0.340647 | -0.072630 | -1251.124664 |
|            | REDO_sir600_me_1      | -1291.189851 | -1290.810080 | -1291.209840 | -1291.515573 | 0.379771 | -0.019988 | -1291.155791 |
|            | $\Delta$ GMA [kJ/mol] |              |              |              |              |          |           | -151.2       |
| <b>M82</b> | REDO_sir610_2         | -1290.399281 | -1290.032363 | -1290.469631 | -1290.713713 | 0.366918 | -0.070350 | -1290.417145 |
|            | REDO_sir610_me_2      | -1330.498349 | -1330.092475 | -1330.517105 | -1330.832799 | 0.405874 | -0.018757 | -1330.445682 |
|            | $\Delta$ GMA [kJ/mol] |              |              |              |              |          |           | -144.4       |



### Example 3: Quantitative structure/reactivity relationships for $\alpha,\beta$ -unsaturated carbonyl compounds

With the Mayr electrophilicities  $E$  for a broad set of  $\alpha,\beta$ -unsaturated carbonyl compounds at hand (from this work), we analyzed the impact of substituents on their electrophilic reactivity in 1,4-additions. The differences in  $E$  between typical classes of Michael acceptors might be used as increments (expressed as  $\Delta E$ ) together with equation 1 to rationalize or estimate the reactivity of Michael acceptors of unknown  $E$ .

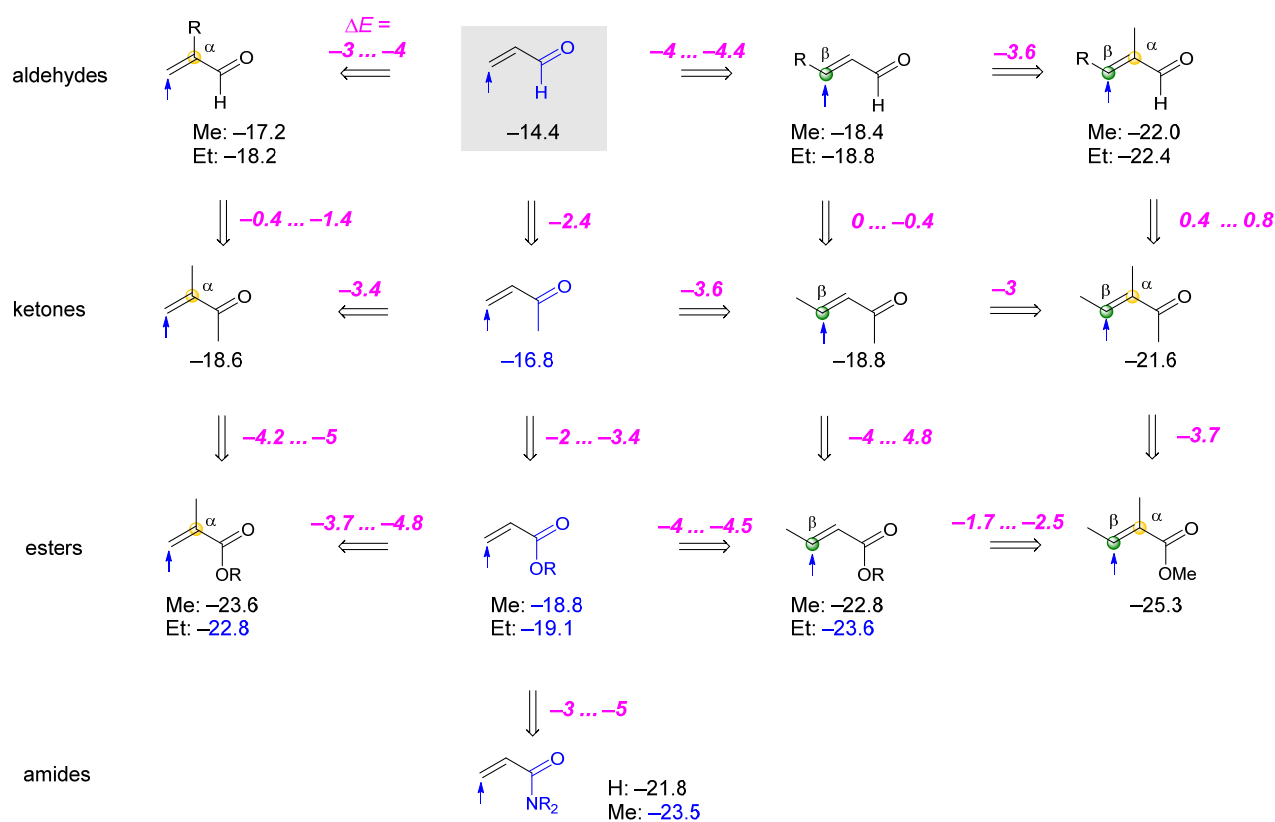

**Figure S4.** Structure/electrophilicity relationships for Michael acceptors based on the electrophilicities  $E$  (in blue color: from ref<sup>[S10c]</sup>; in black color: this work).

Generally, introduction of alkyl substituents in the  $\alpha$ -position reduces the electrophilic reactivity of the Michael acceptor on average by 3 to 4  $E$  units. Analogously, alkyl substituents in the  $\beta$ -position reduce reactivity by 3.5 to 4.5  $E$  units. While the reactivity of  $\alpha,\beta$ -unsaturated aldehydes and the corresponding ketones is in a comparable range (going from an aldehyde to a structurally related ketone generally slightly reduces the reactivity, but the effects are rather small), esters are significantly less reactive by on average of 3 to 5  $E$  units than the corresponding ketones. Swapping a ketone for an amide reduces the electrophilicity significantly ( $\Delta E = -5$  to  $-8$ ).

## Example 4: Rational prediction of Michael additions

According to the Patz-Mayr equation (equation 1, main text), electrophilicity  $E$  is defined as a solvent-independent parameter.<sup>[S37a]</sup> Therefore, the electrophilicity parameters  $E$  of Michael acceptors determined in this study can be combined with any known solvent-dependent nucleophilicity parameter  $N$  (and  $s_N$ ) of potential reaction partners<sup>[S21]</sup> to predict second-order rate constants for their 1,4-addition reactions.<sup>[S37b]</sup>

Will I get a product within reasonable reaction time? In the majority of the possible electrophile-nucleophile combinations the answer to this most important question for synthetic chemists can be given by calculating the sum  $\lg k_2(20\text{ °C}) = E + N$ . If  $E + N > -3$ , the reaction should be feasible at 20 °C when applying typical reactant concentrations of 0.1 M.

In Figure S5 Michael acceptors and nucleophiles are arranged in a way that  $E + N = -3$  for reaction partners on the same horizontal level. Michael acceptors can be expected to react at ambient temperature with nucleophiles on the same level in Figure S5. When equimolar concentrations of 0.1 M are used for the electrophile-nucleophile mixture and  $s_N$  is in the typical range (0.5 to 0.8 for nucleophiles with  $N > 11$  that undergo Michael additions), a half-reaction time between 1 and 3 hours is expected for a certain Michael acceptor when reacting with nucleophilic reaction partners located at the same horizontal level in Figure S5. A certain Michael acceptor will also react at ambient temperature with those nucleophiles, which are positioned below itself in Figure S5, but only sluggish or not at all with those above its own position. Slower reactions may become feasible under harsher reaction conditions, for example, upon heating or increasing the concentrations of reactants up to neat. This is only a crude approximation, however, and considering the susceptibility parameter  $s_N$  in equation 1 is advised for borderline cases.

Please note that the Patz-Mayr equation (equation 1) only analyzes the *kinetic* feasibility for the formation of a  $\sigma$ -bond. Sufficiently *favorable thermodynamics* is another condition for the success of an intended Michael addition. Nevertheless, Figure S5 summarizes well-known synthetically employed reactions of Michael acceptors with nucleophiles. For example, rates of Corey-Chaykovsky cyclopropanations,<sup>[S38]</sup> stepwise 1,3-dipolar cycloadditions (Huisgen reactions),<sup>[S10c]</sup> Weitz-Scheffer epoxidations,<sup>[S39]</sup> cyanoethylations<sup>[S20,S22,S24,S26,S31]</sup> or simple Michael adduct formations (1,4-addition) of Michael acceptors with amines, alkoxide ions, and thiolates<sup>[S20-S31]</sup> can be predicted by using equation 1 and the available Mayr reactivity parameters  $E$ ,  $N$  and  $s_N$ .<sup>[S21]</sup> The precision of these predictions can be assessed from the  $k_2^{\text{exp}}/k_2^{\text{eq 1}}$  ratios, which compare reported experimental rate constants  $k_2^{\text{exp}}$  with rate constants  $k_2^{\text{eq 1}}$  predicted by equation 1 (see Table S6 above).

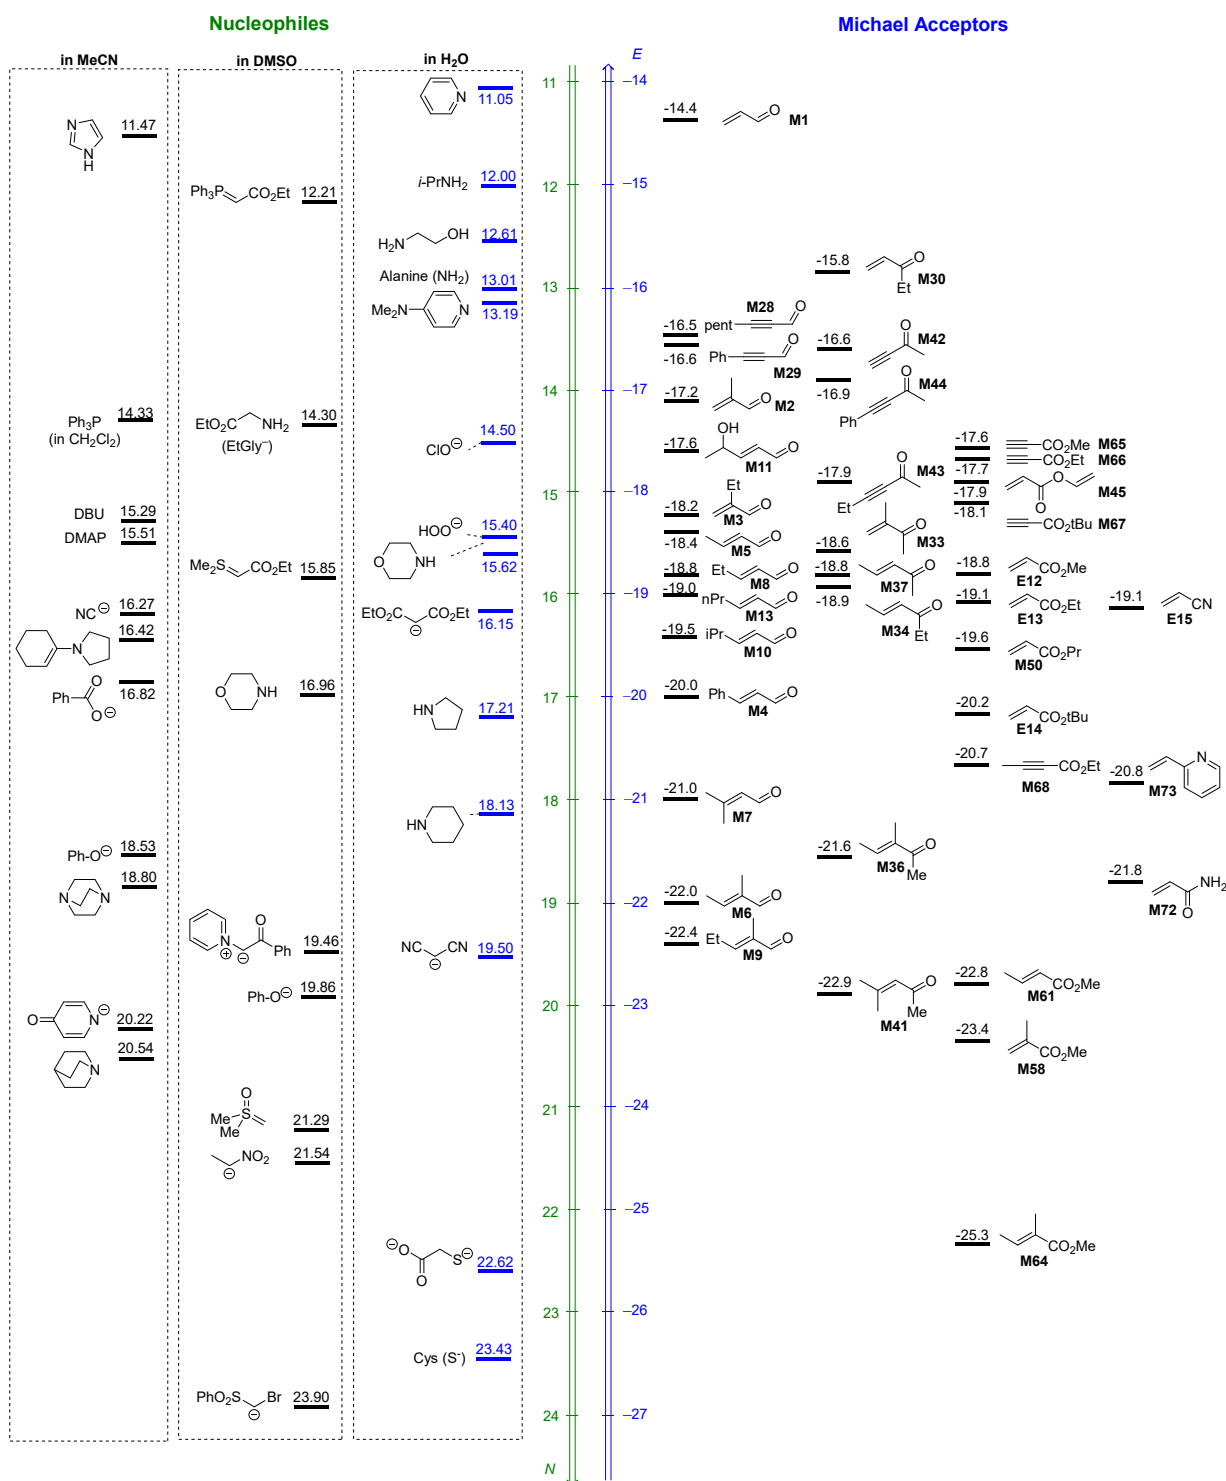

**Figure S5.** Nucleophilicity ( $N$ ) and electrophilicity ( $E$ ) scales arranged in a way that a certain Michael acceptor will react with those nucleophiles, which are positioned below its own level ( $N + E > -3$ ). Nucleophile-specific parameters  $N$  were taken from ref<sup>[S21]</sup>, electrophilicity parameters  $E$  for Michael acceptors were taken from Table S4.

## References

- [S1] J. T. Edsall, J. Wyman, *Biophysical Chemistry*, Academic Press, New York, 1958.
- [S2] M. Friedman, J. F. Cavins, J. S. Wall, *J. Am. Chem. Soc.* **1965**, *87*, 3672–3682.
- [S3] D. L. Rabenstein, *J. Am. Chem. Soc.* **1973**, *95*, 2797–2803.
- [S4] A. Mirzahassemi, M. Somlyay, B. Noszál, *Chem. Phys. Lett.* **2015**, *622*, 50–56.
- [S5] a) T. Bug, H. Mayr, *J. Am. Chem. Soc.* **2003**, *125*, 12980–12986. b) F. Brotzel, H. Mayr, *Org. Biomol. Chem.* **2007**, *5*, 3814–3820.
- [S6] A. Meißner, P. Gockel, H. Vahrenkamp, *Chem. Ber.* **1994**, *127*, 1235–1241.
- [S7] a) H. Esterbauer, H. Zollner, N. Scholz, *Z. Naturforsch. C* **1975**, *30*, 466–473. b) G. Eisenbrand, J. Schuhmacher, P. Gölzer, *Chem. Res. Toxicol.* **1995**, *8*, 40–46. c) K. Chan, R. Poon, P. J. O’Brien, *J. Appl. Toxicol.* **2008**, *28*, 1027–1039.
- [S8] A. Böhme, A. Laqua, G. Schüürmann, *Chem. Res. Toxicol.* **2016**, *29*, 952–962.
- [S9] J. A. H. Schwöbel, D. Wondrusch, Y. K. Koleva, J. C. Madden, M. T. D. Cronin, G. Schüürmann, *Chem. Res. Toxicol.* **2010**, *23*, 1576–1585.
- [S10] a) H. Mayr, J. Ammer, M. Baidya, B. Maji, T. A. Nigst, A. R. Ofial, T. Singer, *J. Am. Chem. Soc.* **2015**, *137*, 2580–2599; b) P. A. Byrne, S. Kobayashi, E.-U. Würthwein, J. Ammer, H. Mayr, *J. Am. Chem. Soc.* **2017**, *139*, 1499–1511; c) D. S. Allgäuer, H. Jangra, H. Asahara, Z. Li, Q. Chen, H. Zipse, A. R. Ofial, H. Mayr, *J. Am. Chem. Soc.* **2017**, *139*, 13318–13329.
- [S11] E. Harder, W. Damm, J. Maple, C. Wu, M. Reboul, J. Y. Xiang, L. Wang, D. Lupyan, M. K. Dahlgren, J. L. Knight, J. W. Kaus, D. S. Cerutti, G. Krilov, W. L. Jorgensen, R. Abel, R. A. Friesner, *J. Chem. Theory Comput.* **2016**, *12*, 281–296.
- [S12] *MacroModel* (Schrödinger Release 2019-1), Schrödinger, LLC, New York, NY, 2019.
- [S13] A. D. Becke, *J. Chem. Phys.* **1993**, *98*, 5648–5652.
- [S14] R. Ditchfield, W. J. Hehre, J. A. Pople, *J. Chem. Phys.* **1971**, *54*, 724–728.
- [S15] R. Krishnan, J. S. Binkley, R. Seeger, J. A. Pople, *J. Chem. Phys.* **1980**, *72*, 650–654.
- [S16] T. Clark, J. Chandrasekhar, G. W. Spitznagel, P. v. R. Schleyer, *J. Comput. Chem.* **1983**, *4*, 294–301.
- [S17] A. V. Marenich, C. J. Cramer, D. G. Truhlar, *J. Phys. Chem. B.* **2009**, *113*, 6378–6396.
- [S18] *Gaussian 16, Revision A.03*, M. J. Frisch, G. W. Trucks, H. B. Schlegel, G. E. Scuseria, M. A. Robb, J. R. Cheeseman, G. Scalmani, V. Barone, G. A. Petersson, H. Nakatsuji, X. Li, M. Caricato, A. V. Marenich, J. Bloino, B. G. Janesko, R. Gomperts, B. Mennucci, H. P. Hratchian, J. V. Ortiz, A. F. Izmaylov, J. L. Sonnenberg, D. Williams-Young, F. Ding, F. Lipparini, F. Egidi, J. Goings, B. Peng, A. Petrone, T. Henderson, D. Ranasinghe, V. G. Zakrzewski, J. Gao, N. Rega, G. Zheng, W. Liang, M. Hada, M. Ehara, K. Toyota, R. Fukuda, J. Hasegawa, M. Ishida, T. Nakajima, Y. Honda, O. Kitao, H. Nakai, T. Vreven, K. Throssell, J. A. Montgomery, Jr., J. E. Peralta, F. Ogliaro, M. J. Bearpark, J. J. Heyd, E. N. Brothers, K. N. Kudin, V. N. Staroverov, T. A. Keith, R. Kobayashi, J. Normand, K. Raghavachari, A. P. Rendell, J. C. Burant, S. S. Iyengar, J. Tomasi, M. Cossi, J. M. Millam, M. Klene, C. Adamo, R. Cammi, J. W. Ochterski, R. L. Martin, K. Morokuma, O. Farkas, J. B. Foresman, and D. J. Fox, Gaussian, Inc., Wallingford CT, 2016.
- [S19] H. Mayr, *Angew. Chem.* **2011**, *123*, 3692–3698; *Angew. Chem. Int. Ed.* **2011**, *50*, 3612–3618.

- [S20] C. K. M. Heo, J. W. Bunting, *J. Org. Chem.* **1992**, *57*, 3570–3578.
- [S21] A database of reactivity parameters  $E$ ,  $N$ , and  $s_N$  can be accessed at: [www.cup.lmu.de/oc/mayr/DBintro.html](http://www.cup.lmu.de/oc/mayr/DBintro.html).
- [S22] H. Shenhav, Z. Rappoport, S. Patai, *J. Chem. Soc. B* **1970**, 469–476.
- [S23] H. Esterbauer, *Monatsh. Chem.* **1970**, *101*, 782–810.
- [S24] M. Friedman, J. S. Wall, *J. Org. Chem.* **1966**, *31*, 2888–2894.
- [S25] N. Ferry, F. J. McQuillin, *J. Chem. Soc.* **1962**, 103–113.
- [S26] R. N. Ring, G. C. Tesoro, D. R. Moore, *J. Org. Chem.* **1967**, *32*, 1091–1094.
- [S27] I.-H. Um, E.-J. Lee, J.-S. Min, *Tetrahedron* **2001**, *57*, 9585–9589.
- [S28] I.-H. Um, J.-S. Lee, S.-M. Yuk, *J. Org. Chem.* **1998**, *63*, 9152–9153.
- [S29] I.-H. Um, J.-S. Lee, S.-M. Yuk, *Bull. Korean Chem. Soc.* **1998**, *19*, 776–779.
- [S30] S.-I Kim, H.-W. Baek, I.-H. Um, *Bull. Korean Chem. Soc.* **2009**, *30*, 2909–2912.
- [S31] B.-A. Feit, A. Zilkha, *J. Org. Chem.* **1963**, *28*, 406–410.
- [S32] X. Jiang, J. Chen, A. Bajić, C. Zhang, X. Song, S. L. Carroll, Z.-L. Cai, M. Tang, M. Xue, N. Cheng, C. P. Schaaf, F. Li, K. R. MacKenzie, A. C. M. Ferreon, F. Xia, M. C. Wang, M. Maletić-Savatić, J. Wang, *Nat. Commun.* **2017**, *8*, 16087.
- [S33] K. Umezawa, M. Yoshida, M. Kamiya, T. Yamasoba, Y. Urano, *Nat. Chem.* **2017**, *9*, 279–286.
- [S34] X. Jiang, Y. Yu, J. Chen, M. Zhao, H. Chen, X. Song, A. J. Matzuk, S. L. Carroll, X. Tan, A. Sizovs, N. Cheng, M. C. Wang, J. Wang, *ACS Chem. Biol.* **2015**, *10*, 864–874.
- [S35] J. Chen, X. Jiang, S. L. Carroll, J. Huang, J. Wang, *Org. Lett.* **2015**, *17*, 5978–5981.
- [S36] O. García-Beltrán, C. González, E. G. Pérez, B. K. Cassels, J. G. Santos, D. Millán, N. Mena, P. Pavez, M. E. Aliaga, *J. Phys. Org. Chem.* **2012**, *25*, 946–952.
- [S37] a) H. Mayr, M. Patz, *Angew. Chem.* **1994**, *106*, 990–1010; *Angew. Chem. Int. Ed. Engl.* **1994**, *33*, 938–957. b) H. Mayr, A. R. Ofial, *Pure Appl. Chem.* **2017**, *89*, 729–744.
- [S38] R. Appel, N. Hartmann, H. Mayr, *J. Am. Chem. Soc.* **2010**, *132*, 17894–17900.
- [S39] a) R. J. Mayer, T. Tokuyasu, P. Mayer, J. Gomar, S. Sabelle, B. Mennucci, H. Mayr, A. R. Ofial, *Angew. Chem.* **2017**, *129*, 13463–13467; *Angew. Chem. Int. Ed.* **2017**, *56*, 13279–13282. b) R. J. Mayer, A. R. Ofial, *Org. Lett.* **2018**, *20*, 2816–2820. c) R. J. Mayer, A. R. Ofial, *Eur. J. Org. Chem.* **2018**, 6010–6017.
